# 1 **Extrinsic Activin signaling cooperates with an intrinsic temporal program** 2 **to increase mushroom body neuronal diversity**

3 Anthony M. Rossi<sup>1</sup> and Claude Desplan<sup>1\*</sup>

4 <sup>1</sup>Department of Biology, New York University, New York, NY 10003, USA.

5 \*Lead contact

6 Correspondence: amr808@nyu.edu, cd38@nyu.edu

7

## 8 **Summary:**

9 Temporal patterning of neural progenitors leads to the sequential production of diverse neuronal types. To  
10 better understand how extrinsic cues interact with intrinsic temporal programs to contribute to temporal  
11 patterning, we studied the *Drosophila* mushroom body neural progenitors (neuroblasts). Each of these  
12 four neuroblasts divides ~250 times to sequentially produce only three main neuronal types over the  
13 course of ~9 days of development:  $\gamma$ , followed by  $\alpha'\beta'$ , and finally  $\alpha\beta$  neurons. The intrinsic temporal  
14 clock is composed of two RNA-binding proteins, IGF-II mRNA binding protein (Imp) and Syncrip (Syp),  
15 that are expressed in opposing temporal gradients. Activin signaling affects the production of  $\alpha'\beta'$   
16 neurons but whether and how this extrinsic cue interacts with the intrinsic temporal program was not  
17 known. We show that the Activin ligand Myoglianin produced from glia regulates the levels of the  
18 intrinsic temporal factor Imp in mushroom body neuroblasts. In neuroblasts mutant for the Activin  
19 signaling receptor *baboon*, Imp levels are higher than normal during the  $\alpha'\beta'$  temporal window, leading  
20 to the specific loss of the  $\alpha'\beta'$  neurons. The intrinsic temporal clock still progresses but with a delay,  
21 skipping the  $\alpha'\beta'$  window without affecting the total number of neurons produced: The number of  $\gamma$   
22 neurons increases,  $\alpha'\beta'$  disappear and the number of  $\alpha\beta$  neurons decreases. Our results illustrate that an  
23 extrinsic cue modifies an intrinsic temporal program to increase neuronal diversity.

24

25

1 **Keywords:**

2 Temporal patterning, neuronal specification, intrinsic, extrinsic, *Drosophila*, mushroom body, Kenyon  
3 cells, RNA-binding, Activin, Myoglianin

4  
5 **Introduction:**

6 The building of intricate neural networks during development is controlled by highly coordinated  
7 patterning programs that regulate the generation of different neuronal types in the correct number, place  
8 and time. The sequential production of different neuronal types from individual progenitors, *i.e.* temporal  
9 patterning, is a conserved feature of neurogenesis (Cepko, 2014; Holguera and Desplan, 2018; Kohwi and  
10 Doe, 2013; Lodato and Arlotta, 2015). For instance, individual radial glia progenitors in the vertebrate  
11 cortex sequentially give rise to neurons that occupy the different cortical layers in an inside-out manner  
12 (Gao et al., 2014; Llorca et al., 2019). In *Drosophila*, neural progenitors (called neuroblasts) also give rise  
13 to different neuronal types sequentially. For example, projection neurons in the antennal lobe are born in a  
14 stereotyped temporal order and innervate specific glomeruli (Jefferis et al., 2001; Kao et al., 2012; Yu et  
15 al., 2010). In both of these examples, individual progenitors age concomitantly with the developing  
16 animal (e.g., from embryonic stages 11-17 in mouse and from the first larval stage (L1) to the end of the  
17 final larva stage (L3) in *Drosophila*). Thus, these progenitors are exposed to changing environments that  
18 could alter their neuronal output. Indeed, classic heterochronic transplantation experiments demonstrated  
19 that young cortical progenitors placed in an old host environment alter their output to match the host  
20 environment and produce upper-layer neurons (Desai and McConnell, 2000; McConnell, 1988;  
21 McConnell and Kaznowski, 1991).

22 The adult *Drosophila* central brain is built from ~100 neuroblasts (Lee et al., 2020; Urbach and  
23 Technau, 2004; Wong et al., 2013; Yu et al., 2013a) that divide continuously from L1 to L3 (Homem et  
24 al., 2014; Sousa-Nunes et al., 2010; Yang et al., 2017). Each asymmetric division regenerates the  
25 neuroblast and produces an intermediate progenitor called ganglion mother cell (GMC) that divides only  
26 once, typically producing two different cell types (Lin et al., 2010; Spana and Doe, 1996; Truman et al.,

1 2010). Thus, during larval life central brain neuroblasts divide 50-60 times, sequentially producing many  
2 different neuronal types. All central brain neuroblasts progress through opposing temporal gradients of  
3 two RNA-binding proteins as they age: IGF-II mRNA binding protein (Imp) when they are young and  
4 Syncrip (Syp) when they are old (Liu et al., 2015; Syed et al., 2017b, 2017a; Yang et al., 2015). Loss of  
5 Imp or Syp in antennal lobe or Type II neuroblasts affects the ratio of young to old neuronal types (Liu et  
6 al., 2015; Ren et al., 2017). Imp and Syp also affect neuroblast lifespan (Yang et al., 2017). Thus, a single  
7 temporal program can affect both the diversity of neuronal types produced and their numbers.

8         Since central brain neuroblasts produce different neuronal types through developmental time,  
9 roles for extrinsic cues have recently garnered attention. Ecdysone triggers all the major developmental  
10 transitions including progression into the different larval stages and entry in pupation (Yamanaka et al.,  
11 2013). The majority of central brain neuroblasts are not responsive to ecdysone until mid-larval life when  
12 they begin to express the Ecdysone Receptor (EcR) (Syed et al., 2017a). Expressing a dominant-negative  
13 version of EcR (EcR-DN) in Type II neuroblasts delays the Imp to Syp transition that normally occurs  
14 ~60 hours after larval hatching (ALH). This leads to many more cells that express the early-born marker  
15 gene Repo and fewer cells that express the late-born marker gene Bsh.

16         To further understand how extrinsic signals contribute to temporal patterning, we studied  
17 mushroom body neuroblasts because of the deep understanding of their development. The mushroom  
18 body is comprised of ~2,000 neurons (Kenyon cells) that belong to only three main neuronal types that  
19 have unique morphologies and play distinct roles in learning and memory (Cognigni et al., 2018; Ito et  
20 al., 1997; Lee et al., 1999). They receive input mainly from ~200 projection neurons that each relays odor  
21 information from olfactory receptor neurons (Vosshall and Stocker, 2007). Each projection neuron  
22 connects to a random subset of Kenyon cells and each Kenyon cell receives input from ~7 different  
23 projection neurons (Jefferis et al., 2007; Murthy et al., 2008; Turner et al., 2008). This connectivity  
24 pattern requires a large number of mushroom body neurons (~2,000) to represent complex odors (Hige,  
25 2018). To produce this very large number of neurons, mushroom body development is unique in many  
26 respects. Mushroom body neurons are born from four identical neuroblasts that divide continuously

1 (unlike any other neuroblast) from the late embryonic stages until the end of pupation (~9 days for ~250  
2 divisions each) (Fig. 1A) (Ito et al., 1997; Kraft et al., 2016; Kunz et al., 2012; Kurusu et al., 2009; Lee et  
3 al., 1999; Pahl et al., 2019; Siegrist et al., 2010; Sipe and Siegrist, 2017). Furthermore, the two neurons  
4 born from each mushroom body GMC are identical. The neuronal simplicity of the adult mushroom body  
5 makes it ideal to study how extrinsic cues might affect diversity since the loss of any single neuronal type  
6 is obvious given that each is represented hundreds of times.

7         The three main neuronal types that make up the adult mushroom body are produced sequentially  
8 during neurogenesis: first  $\gamma$ , followed by  $\alpha'\beta'$ , and then  $\alpha\beta$  neurons (Lee et al., 1999) (Fig. 1A),  
9 representing the simplest lineage in the central brain. The  $\gamma$  temporal window extends from L1 (the first  
10 larval stage) until mid L3 (the final larval stage) when animals attain critical weight and are committed to  
11 metamorphosis; the  $\alpha'\beta'$  window from mid L3 to the beginning of pupation, and the  $\alpha\beta$  window from  
12 pupation until eclosion (the end of development). Like all other central brain neuroblasts Imp and Syp are  
13 expressed by mushroom body neuroblasts, but in much shallower gradients through time, which accounts  
14 for their extended lifespan (Liu et al., 2015; Yang et al., 2017). Imp and Syp are inherited by newborn  
15 neurons where they instruct temporal identity. Imp positively and Syp negatively regulate the translation  
16 of *chronologically inappropriate morphogenesis (chinmo)*, a gene encoding a transcription factor that acts  
17 as a temporal morphogen in neurons (Kao et al., 2012; Ren et al., 2017; Zhu et al., 2006). The first-born  $\gamma$   
18 neurons are produced for the first ~85 cell divisions, when Imp levels in neuroblasts, and thus Chinmo in  
19 neurons, are high.  $\alpha'\beta'$  neurons are produced for the next ~40 divisions, when Imp and Syp are at similar  
20 low levels that translate into lower Chinmo levels in neurons. Low Chinmo then regulates the expression  
21 in neurons of *maternal gene required for meiosis (mamo)*, which encodes a transcription factor that  
22 specifies the  $\alpha'\beta'$  fate and whose mRNA is stabilized by Syp (Liu et al., 2019).  $\alpha\beta$  neurons are generated  
23 for the final ~125 neuroblast divisions, when Syp levels are high, Imp is absent in neuroblasts, and thus  
24 Chinmo and Mamo are no longer expressed in neurons.

1           Extrinsic cues are known to have important roles in regulating neuronal specification and  
2 differentiation during mushroom body neurogenesis. The ecdysone peak that controls entry into pupation  
3 regulates  $\gamma$  neuron axonal remodeling (Lee et al., 2000). Ecdysone was also proposed to be required for  
4 the final differentiation of  $\alpha'\beta'$  neurons (Marchetti and Tavosanis, 2017). EcR expression in  $\gamma$  neurons is  
5 timed by Activin signaling, a member of the TGF $\beta$  family, from local glia (Awasaki et al., 2011; Zheng et  
6 al., 2003). Activin signaling is also required for  $\alpha'\beta'$  specification (Marchetti and Tavosanis, 2019):  
7 Knocking-down the Activin pathway receptor Baboon (Babo) leads to the loss of  $\alpha'\beta'$  neurons. It was  
8 proposed that Activin signaling in mushroom body neuroblasts regulates the expression of EcR in  
9 prospective  $\alpha'\beta'$  neurons, providing a link between the two signaling pathways (Marchetti and Tavosanis,  
10 2019).

11           Although there is strong evidence that extrinsic cues have important functions in neuronal  
12 patterning in the *Drosophila* central brain, it remains unknown how extrinsic temporal cues interface with  
13 the Imp and Syp intrinsic temporal program to regulate neuronal specification. Here we address this  
14 question using the developing mushroom bodies. We independently discovered that Activin signaling  
15 from glia is required for  $\alpha'\beta'$  specification. However, we show that Activin signaling lowers the levels of  
16 the intrinsic factor Imp in mushroom body neuroblasts to define the mid  $\alpha'\beta'$  temporal identity window.  
17 Removing the Activin receptor Babo in mutant clones leads to the loss of  $\alpha'\beta'$  neurons, to fewer last-born  
18  $\alpha\beta$  neurons, and to the generation of additional first-born  $\gamma$  neurons without affecting overall clone size.  
19 This appears to be caused by a delayed decrease in Imp levels, although the intrinsic temporal clock still  
20 progresses even in the absence of Activin signaling. We also demonstrate that ecdysone signaling is not  
21 necessary for the specification of  $\alpha'\beta'$  neurons, although it might still be involved in later  $\alpha'\beta'$   
22 differentiation. Our results provide a model for how intrinsic and extrinsic temporal programs operate  
23 within individual progenitors to regulate neuronal specification.

24

25   **Results:**

## 1 $\alpha'\beta'$ neurons are not generated from *babo* mutant neuroblasts

2 The production of the three different mushroom body neuronal types occurs within specific  
3 developmental stages of larval and pupal development. That is, the  $\gamma$  window extends from L1 to mid L3,  
4 the  $\alpha'\beta'$  window from mid L3 to pupation, and the  $\alpha\beta$  window from pupation to eclosion (Fig. 1A) (Lee  
5 et al., 1999). This means that extrinsic cues could play a role in controlling or fine-tuning transitions  
6 between these temporal windows. Additionally, the specification of neuronal identity within each  
7 temporal window could be aided by extrinsic cues. To test these hypotheses, we used Mosaic Analysis  
8 with Repressible Cell Marker (MARCM) (Lee and Luo, 1999) to test the function of receptors for inter-  
9 cellular signaling pathways with known roles either in mushroom body neurogenesis (Activin and  
10 Ecdysone) (Lee et al., 2000; Marchetti and Tavosanis, 2017, 2019; Zheng et al., 2003) or more broadly  
11 during nervous system development (Hedgehog and juvenile hormone) (Fig. S1) (Baumann et al., 2017;  
12 Chai et al., 2013). We induced mushroom body neuroblast clones at L1 and compared the axonal  
13 morphologies of adult neurons born from mutant neuroblasts to neurons born from surrounding wildtype  
14 neuroblasts. To identify mushroom body axonal lobes (both mutant and wildtype), we used antibodies to  
15 the Rho guanine exchange factor Trio (a weak  $\gamma$  and strong  $\alpha'\beta'$  cytoplasmic marker ) and to the cell  
16 adhesion molecule Fasciclin II (FasII) (an axonal  $\gamma$  and  $\alpha\beta$  marker) (Fig. 1B) (Awasaki et al., 2000;  
17 Crittenden et al., 1998). To visualize mushroom body neurons within clones we expressed *UAS-*  
18 *CD8::GFP* under the control of *OK107-Gal4* (referred to as *mb-Gal4* hereafter), a *Gal4* enhancer trap in  
19 *eyeless* and a common mushroom body *Gal4* driver that strongly labels all mushroom body neuronal  
20 types during development and in the adult, and weakly mushroom body neuroblasts and young neurons  
21 throughout development (Connolly et al., 1996; Liu et al., 2015; Zhu et al., 2006).

22 In wildtype clones induced at L1, GFP<sup>+</sup> axons projected to all five mushroom body lobes:  $\alpha$ ,  $\alpha'$ ,  $\beta$ ,  
23  $\beta'$  (hidden behind the  $\gamma$  lobe in max projections), and  $\gamma$  (Fig. 1D, Fig. S1A). In clones mutant for *babo*, we  
24 did not detect GFP<sup>+</sup> axons within the  $\alpha'\beta'$  lobes, which remained visible by Trio staining due to the  
25 presence of wildtype  $\alpha'\beta'$  neurons (Fig. 1E, Fig. S1B). In addition, and as previously described,  $\gamma$  neurons

1 within *babo* mutant clones remained unpruned (visualized by vertical GFP<sup>+</sup> axons that were Trio<sup>+</sup> and  
2 FasII<sup>+</sup>), providing a positive control since  $\gamma$  remodeling is known to require Activin signaling (Fig. 1E,  
3 S1B) (Awasaki et al., 2011; Yu et al., 2013b; Zheng et al., 2003).

4 Babo is the sole Type I receptor in the Activin pathway (a member of the TGF $\beta$  family of  
5 signaling molecules). Babo with its Type II co-receptors binds four different Activin ligands and acts  
6 through the transcription factor Smad on X (Smad2) (Brummel et al., 1999; Upadhyay et al., 2017). We  
7 induced *Smad2* mutant clones at L1 and characterized adult axonal morphologies. Similar to *babo* mutant  
8 clones, *Smad2* clones were missing  $\alpha'$  $\beta'$  neurons and also contained unpruned  $\gamma$  neurons (Fig. S1I).

9 The absence of GFP<sup>+</sup> axons within the  $\alpha'$  $\beta'$  lobes in *babo* mutant clones could be due to the loss  
10 of axonal projections, or to the loss of neuronal identity. Using antibodies against Trio and Mamo that  
11 strongly label  $\alpha'$  $\beta'$  neuron cell bodies in the adult (Fig. 1B, Fig. S1J) (Alyagor et al., 2018; Awasaki et  
12 al., 2000; Croset et al., 2018; Liu et al., 2019), we detected strong Trio<sup>+</sup> and Mamo<sup>+</sup> cells within adult  
13 GFP<sup>+</sup> clones induced at L1 (Fig. 1F, Fig. S1K). In *babo* mutant clones however, the vast majority of  
14 strong Trio<sup>+</sup> and Mamo<sup>+</sup> cells inside clones were missing compared to surrounding wildtype neurons (Fig.  
15 1G, Fig. S1L), suggesting that  $\alpha'$  $\beta'$  neurons were not specified. We quantified the number of  $\alpha'$  $\beta'$   
16 neurons in wildtype and *babo* clones by counting the number of strong Mamo<sup>+</sup> cells within a clone versus  
17 the total number of strong Mamo<sup>+</sup> cells outside the clone. In wildtype MARCM clones affecting a single  
18 mushroom body neuroblast (n=7), the percentage of all  $\alpha'$  $\beta'$  neurons that were present within the clones  
19 was 25.5%, the expected ratio since each mushroom body is built from four identical neuroblasts (Fig.  
20 1H) (Ito et al., 1997; Lee et al., 1999). In comparison, in *babo* mutant clones (n=8) the percentage of  $\alpha'$  $\beta'$   
21 neurons within clones was 2.2% (Fig. 1H). These data suggest that Activin signaling is necessary for  $\alpha'$  $\beta'$   
22 specification.

23 We next sought to determine the fate of the missing  $\alpha'$  $\beta'$  neurons in *babo* clones, particularly  
24 since there was no significant difference in average clone sizes between mutant and control clones labeled  
25 with *mb-Gal4* (wildtype: clone size= 533.6, n=7; *babo*: clone size = 551.3, n=7) (Fig. 1H'), which

1 suggests that there is no defect in neuroblast proliferation, and that  $\alpha'\beta'$  neurons are not lost by cell death  
2 in *babo* clones. However, to directly test whether cell death played a role, we expressed the caspase  
3 inhibitor P35 in *babo* mutant clones (Fig. S2A). However,  $\alpha'\beta'$  neurons were still missing in the adult  
4 (Fig. S2A), indicating that  $\alpha'\beta'$  neurons are not generated and then die. We thus tested whether the  $\gamma$  or  
5  $\alpha\beta$  temporal windows were extended in *babo* mutant clones. We made MARCM clones in which the  $\gamma$ ,  
6  $\alpha'\beta'$  or  $\alpha\beta$  neurons were specifically marked with different *Gal4* lines, and then quantified the total  
7 number of GFP<sup>+</sup> neurons in wildtype versus *babo* mutant clones (Fig. 1I-K, Fig. S2B-M). Using *R71G10-*  
8 *Gal4* (Issman-Zecharya and Schuldiner, 2014) (referred to as  $\gamma$ -*Gal4*), the average number of  $\gamma$  neurons  
9 trended higher in *babo* mutant clones, although not significantly (wildtype: 154.3, n=10; *babo*: 178.4,  
10 n=12) (Fig. 1I, Fig. S2B-E), likely because the number of  $\gamma$  neurons directly depends on the time of clone  
11 induction.  $\alpha'\beta'$  neurons, marked by *41C07-Gal4* (referred to as  $\alpha'\beta'$ -*Gal4*), were mostly missing in *babo*  
12 mutant clones compared to wildtype clones (wildtype: 81.5, n=4; *babo*: 2.1, n=8,) consistent with our  
13 previous results when counting strong Mamo<sup>+</sup> cells in *babo* clones marked by *mb-Gal4* (Fig. 1H, 1J, Fig.  
14 S2F-I). The average number of  $\alpha\beta$  neurons, marked by *44E04-Gal4* (referred to as  $\alpha\beta$ -*Gal4*), was  
15 significantly reduced in *babo* versus wildtype clones (wildtype: 276, n=7,; *babo*: 228.9, n=8) (Fig. 1K,  
16 Fig. S2J-M). Together, these results suggest that additional  $\gamma$  neurons are produced, and that fewer  $\alpha\beta$   
17 neurons are generated, in *babo* mutant clones. We note that the total number of neurons labeled by our  
18 neuron type specific *Gal4* drivers did not add up to the expected number of ~500 neurons in *babo* mutant  
19 clones, which is likely explained by the large variability in the number of  $\gamma$  neurons labeled by  $\gamma$ -*Gal4* in  
20 *babo* mutant clones. These results are consistent with a recent report showing the loss of  $\alpha'\beta'$  neurons in  
21 the adult following knockdown of *babo* with RNA interference (RNAi), which was explained by a role in  
22 regulating EcR expression in neurons (see below) (Marchetti and Tavosanis, 2019). Here, we focused on  
23 understanding whether and how Activin signaling interacts with the intrinsic Imp and Syp temporal  
24 program.

25



1

2

3

#### 4 **Activin signaling acts in neuroblasts to lower Imp levels and specify $\alpha'\beta'$ neurons**

5 Given that  $\alpha'\beta'$  neuronal specification is intrinsically controlled by Imp and Syp (Liu et al., 2015), we  
6 asked whether Activin signaling acts through or in parallel to this intrinsic temporal system, specifically  
7 at L3 when  $\alpha'\beta'$  neurons are being produced. We first asked whether *babo* is expressed at L3 in  
8 mushroom body neuroblasts. Based on published transcriptome data collected from mushroom body  
9 neuroblasts at different developmental stages (Liu et al., 2015; Yang et al., 2015), *babo* is expressed  
10 evenly through time in mushroom body neuroblasts, unlike the two RNA binding proteins *Imp* and *Syp*  
11 (Fig. S3A). Although this measure does not take into account the possibility of post-transcriptional  
12 regulation, it is likely that the Activin signaling pathway is temporally controlled by ligand interaction  
13 and not by differential expression of *babo*.

14 To directly test whether Activin signaling acts on Imp and Syp to affect  $\alpha'\beta'$  specification, we  
15 induced MARCM clones for *babo* at L1 and compared the Imp to Syp protein ratio in mutant mushroom  
16 body neuroblasts to surrounding wildtype neuroblasts at wandering L3 (Fig. 2). The average Imp to Syp  
17 ratio was significantly higher in *babo* neuroblasts (ratio: 4.2; n=9 from 4 different brains) compared to  
18 wildtype neuroblasts (ratio: 2.4; n=23 from the same 4 brains as *babo*) at L3, driven by a significantly  
19 higher Imp level in mutant neuroblasts (Fig. 2, Fig. S3B) while Syp was not significantly different (Fig.  
20 SB'). In addition, the  $\alpha'\beta'$  neuronal marker Mamo (Liu et al., 2019) was lost in *babo* mutant clones at L3  
21 (Fig. S3C), consistent with the notion that high Imp levels block  $\alpha'\beta'$  specification. The significantly  
22 higher Imp to Syp ratio in *babo* mutant neuroblasts persisted even ~24 hours After Pupal Formation  
23 (APF) (*babo* ratio: 0.58; n=7 from 6 different brains; wildtype ratio: 0.27; n=27 from the same 6 brains as  
24 *babo*), once again driven by higher Imp levels (Fig. S3D-I). Together, these results indicate that Activin  
25 signaling lowers Imp levels at late larval and early pupal stages. Importantly, although Imp was higher in

1 *babo* mutant neuroblasts and persisted longer, the absolute level of Imp still decreased significantly albeit  
2 with prolonged kinetics, while the absolute level of Syp was higher in *babo* mutant neuroblasts at ~24  
3 hours APF vs. L3 (Fig. S3J-J'): Thus, these changes are either intrinsically regulated or are affected by  
4 additional extrinsic factors. Our finding that Imp was higher in *babo* mutant neuroblasts at L3 is also  
5 consistent with our suggestion that additional  $\gamma$  neurons are produced and that the number of  $\alpha\beta$  neurons  
6 decreases, since higher Imp levels for a longer period of time may lead to the production of  $\gamma$  neurons  
7 during the  $\alpha'\beta'$  time window and expanding to the beginning of the  $\alpha\beta$  window. The lack of  $\alpha'\beta'$   
8 neurons in *babo* mutant clones even though Imp levels were finally low at ~24 hours APF suggests that  
9  $\alpha'\beta'$  specification can only occur from L3 to the start of pupation.

10 We have shown that Activin signaling functions in mushroom body neuroblasts to decrease Imp  
11 during L3. However, previous studies have shown that Babo also acts post-mitotically in mushroom body  
12  $\gamma$  neurons where it times the expression of EcR for their remodeling, indicating that Babo can act  
13 independently in neuroblasts and in neurons (Zheng et al., 2003). To test if Activin signaling functions  
14 post-mitotically in prospective  $\alpha'\beta'$  neurons, we characterized the morphology of *babo* mutant neurons  
15 born from ganglion mother cell (GMC) clones induced during mid-late L3, the time at which  $\alpha'\beta'$   
16 neurons are born. GMCs are intermediate progenitors that divide only once to produce two neurons. In  
17 this way, the role of Babo in prospective  $\alpha'\beta'$  neurons can be tested without affecting mushroom body  
18 neuroblasts:  $\alpha'\beta'$  neurons were present in *babo* GMC clones (n=34/34), observable by axonal projections  
19 into the Trio labeled  $\alpha'\beta'$  lobes (Fig. S3K-K'). As a positive control for the efficiency of *babo* GMC  
20 clones, we also made *babo* GMC clones at L1 to target  $\gamma$  neurons. In the majority of cases,  $\gamma$  axons  
21 remained unpruned (n=8/10, Fig. S3L-L') (Zheng et al., 2003). These results show that Activin signaling  
22 acts in mushroom body neuroblasts, and not in neurons, to specify the  $\alpha'\beta'$  fate.

23

24 **Activin signaling is sufficient to expand production of  $\alpha'\beta'$  neurons**

1 Since Activin signaling functions in mushroom body neuroblasts and is necessary for  $\alpha'\beta'$  specification,  
2 we next investigated whether it is sufficient for the  $\alpha'\beta'$  fate. We expressed a constitutively active form  
3 of the Babo receptor (*UAS-Babo-Act*) throughout development in MARCM clones with *mb-Gal4* and  
4 assessed the total number of  $\alpha'\beta'$  neurons in the adult by strong Mamo expression. While in wildtype  
5 clones the percentage of  $\alpha'\beta'$  neurons was 25.5% (n=7), the number of  $\alpha'\beta'$  neurons present within *UAS-*  
6 *Babo-Act* clones significantly increased to 32% (n=4) (Fig. 3A-B). To ask when these additional  $\alpha'\beta'$   
7 neurons were produced, we characterized the expression of the  $\alpha'\beta'$  marker Mamo in young neurons at  
8 early L3, when  $\gamma$  neurons are being produced. In comparison to wildtype neurons, Mamo was expressed  
9 in neurons in *UAS-Babo-Act* clones at this stage (Fig. 3C-D). These results confirm the precocious  
10 specification of  $\alpha'\beta'$  neurons, although constitutively expressing an activated version of Babo did not  
11 result in adult clones consisting entirely of  $\alpha'\beta'$  neurons.

12

### 13 **Glia are the source of the Activin ligand Myoglianin to specify $\alpha'\beta'$ neurons**

14 Our finding that Activin signaling plays an important role in specifying  $\alpha'\beta'$  identity during mushroom  
15 body development led us to question from where the Activin ligand originates. Glia secrete the Activin  
16 ligand Myoglianin (Myo) to initiate  $\gamma$  neuron remodeling by activating EcR at L3 (Awasaki et al., 2011;  
17 Yu et al., 2013b). Therefore, we hypothesized that Myo from glia may also regulate  $\alpha'\beta'$  specification.  
18 To test this, we knocked-down *myo* by expressing *UAS-myo-RNAi* with *repo-Gal4*, a driver expressed in  
19 all glia, and quantified the total number of  $\alpha'\beta'$  neurons based on strong Mamo expression in the adult  
20 (Fig. 4A-E). In comparison to control (428.9, n=10), the number of  $\alpha'\beta'$  neurons was dramatically  
21 reduced (106.6; n=10) (Fig. 4E). Mamo was also not expressed in mushroom body neurons at L3 (Fig.  
22 4F-G). Importantly, EcR was not expressed in  $\gamma$  neurons at this stage, providing a positive control for the  
23 efficiency of *UAS-myo-RNAi*. We note that even though the number of  $\alpha'\beta'$  neurons was reduced in this  
24 experiment, *myo* knockdown was weaker than *babo* mutant clones, possibly due to incomplete

1 knockdown of *myo* or because more than one ligand (or more than one source) contribute to  $\alpha'\beta'$   
2 specification. Our results are consistent with a recent report that also showed that glia are the source of  
3 Myo for  $\alpha'\beta'$  specification (Marchetti and Tavosanis, 2019).

#### 4 **$\alpha'\beta'$ neurons are specified by low Imp levels at L3**

5 We and others have shown that Activin signaling is necessary for  $\alpha'\beta'$  specification (Marchetti and  
6 Tavosanis, 2019). We have shown that Activin signaling acts by lowering Imp levels at L3. Although Imp  
7 is required for  $\alpha'\beta'$  specification (Fig. S4A-C) (Liu et al., 2015), we wanted to determine whether low  
8 Imp levels are required at L3. We therefore characterized Mamo expression in young neurons at L3  
9 following knockdown (*UAS-Imp-RNAi*) or overexpression (*UAS-Imp-OE*) of *Imp* with *mb-Gal4*. (Fig.  
10 S4A-C) (Liu et al., 2015). Consistent with our model, Mamo was not expressed in either condition.  
11 Although knocking-down *Syp* by expressing *UAS-Syp-RNAi* led to the loss of Mamo, its early  
12 overexpression (*UAS-Syp-OE*) did not (Fig. 5D-E). The loss of Mamo in *Syp* knockdown is consistent  
13 with its role in stabilizing *mamo* transcripts at L3 (Liu et al., 2019). We conclude that low Imp and low or  
14 high *Syp* levels are required for  $\alpha'\beta'$  specification. Consistent with this, we were unable to rescue the loss  
15 of  $\alpha'\beta'$  neurons in *babo* mutant clones by constitutively repressing Imp with *UAS-Imp-RNAi* (0.2%, n=7)  
16 (Fig. S4I, S4N, S4P), likely due Imp reduction below the threshold required for  $\alpha'\beta'$  specification.  
17 However, we could rescue *babo* mutant clones by expressing *UAS-babo* (21.1%, n=6) (Fig. S4A-C, S4K-  
18 M, S4P). Overexpressing *Syp* (*UAS-Syp-OE*) to reduce the altered Imp:*Syp* ratio in *babo* mutant clones  
19 also did not rescue  $\alpha'\beta'$  neurons (1.8%, n=7) (Fig. S4J, S4O-P), further highlighting that Imp but not *Syp*  
20 levels are important for  $\alpha'\beta'$  specification.

21

#### 22 **Ecdysone signaling is not necessary for $\alpha'\beta'$ specification**

23 It has been proposed that Activin signaling in mushroom body neuroblasts leads to EcR expression in  
24 neurons and that ecdysone signaling at late L3 induces differentiation of  $\alpha'\beta'$  neurons (Marchetti and  
25 Tavosanis, 2017, 2019). The role of ecdysone was tested by expressing a dominant-negative ecdysone

1 receptor (*UAS-EcR-DN*). We confirmed these results by also expressing *UAS-EcR-DN* driven by *mb-Gal4*  
2 and were unable to detect GFP<sup>+</sup> mutant axons within adult  $\alpha'\beta'$  lobes marked by Trio (Fig. 6A-B). In  
3 addition, strong Trio<sup>+</sup> and Mamo<sup>+</sup> cells were missing inside *UAS-EcR-DN* mutant clones compared to  
4 wildtype clones (wildtype: 25.5%, n=7; *UAS-EcR-DN*: 3.4%, n=6) (Fig. 6C-E, Fig. S5A). However, we  
5 were surprised to find that  $\alpha'\beta'$  neurons were still present in mutant clones for the EcR co-receptor  
6 *ultraspiracle (usp)* (Fig. 6F). Therefore, we sought to better understand the function of EcR-DN. Unlike  
7 our result in *babo* mutant neuroblasts, we did not observe a significant difference in the average Imp to  
8 Syp protein ratio at L3 in *UAS-EcR-DN* expressing mushroom body neuroblasts with *mb-Gal4* (*UAS-*  
9 *EcR-DN* ratio: 2.6, n=4 from 4 different brains; wildtype ratio: 1.7, n=27 from the same 4 brains as *UAS-*  
10 *EcR-DN*) (Fig. 6G-J, S5B-B'). In order to specify  $\alpha'\beta'$  neurons, EcR should function in neuroblasts at the  
11 time these neurons are produced. However, driving strong expression of *UAS-EcR-DN* in neuroblast with  
12 *inscuteable-Gal4* (referred to as *NB-Gal4*) and labeling all adult neurons with *R13F02-Gal4* (referred to  
13 as *mb2-Gal4*) (Jenett et al., 2012) did not lead to the loss of  $\alpha'\beta'$  neurons in the adult (Fig. 6K-N, S5C-  
14 D). These results indicate that EcR-DN acts in neurons, not neuroblasts, to lead to the loss of  $\alpha'\beta'$   
15 neurons, which is consistent with our inability to detect EcR protein in mushroom body neuroblasts at  
16 wandering L3 (Fig. S5E-E), although EcR was expressed in  $\gamma$  neurons at this stage (Fig. S5F-F') (Lee et  
17 al., 2000; Liu et al., 2015; Marchetti and Tavosanis, 2017).

18 Since Mamo expression marks  $\alpha'\beta'$  neurons during development (Liu et al., 2019), we asked  
19 whether EcR-DN affects Mamo expression. At L3, Mamo expression was lost in *UAS-EcR-DN*  
20 expressing clones driven by *mb-Gal4* (Fig. 6P) but it was not affected by expression of *UAS-EcR-RNAi*  
21 (Fig. 6Q) although the RNAi was effective since we could not detect EcR protein in mushroom body  
22 neurons (Fig. 6O, 6Q). Given these contradictory results, we compared Mamo and EcR expression at L3:  
23 Mamo and EcR appeared mutually exclusive as EcR was not expressed in young  $\alpha'\beta'$  neurons (see Fig.  
24 6O'). These results are also consistent with our inability to rescue the loss of  $\alpha'\beta'$  neurons in *babo*  
25 mutant clones by expressing *UAS-EcR* (Fig. S5G-H). In summary,  $\alpha'\beta'$  neurons were only lost in adult

1 clones when expressing *UAS-EcR-DN* and not in *usp* mutant clones and  $\alpha'\beta'$  neurons were still present in  
2 *EcR-RNAi* in L3. In addition, EcR protein was not detected in Mamo<sup>+</sup> cells during development, although  
3 expressing *UAS-EcR-DN* blocked Mamo expression at L3. We conclude that ecdysone signaling is not  
4 involved in  $\alpha'\beta'$  specification although it might still be required for late differentiation of  $\alpha'\beta'$  neurons  
5 (Marchetti and Tavosanis, 2017). We therefore speculate that loss of  $\alpha'\beta'$  neurons with *UAS-EcR-DN* is  
6 caused by off-target inhibition of Mamo.

7

## 8 **Discussion:**

### 9 **Establishment of mushroom body neuronal identities**

10 Mushroom body neurogenesis is unique and programmed to generate many copies of a few neuronal  
11 types.

12 During the early stages of mushroom body development, high Imp levels are translated into high Chinmo  
13 levels to specify  $\gamma$  identity. As in other central brain neuroblasts, as development proceeds, inhibitory  
14 interactions between Imp and Syp help create a slow decrease of Imp and a corresponding increase of  
15 Syp. However, at the end of the  $\gamma$  temporal window (mid L3), Activin signaling from glia acts to rapidly  
16 reduce Imp levels without significantly affecting Syp, establishing a period of low Imp (and thus low  
17 Chinmo) and also low Syp. This is required for activating effector genes in prospective  $\alpha'\beta'$  neurons,  
18 including Mamo, whose translation is promoted by Syp (Liu et al., 2019). The production of  $\alpha\beta$  identity  
19 begins when Imp (and thus Chinmo) are further decreased and Syp levels are high (modeled in Fig. 7).  
20 The peak of ecdysone that instructs the larval to pupal transitions instructs  $\gamma$  neurons to remodel (Zheng et  
21 al., 2003) but is not involved in the specification of  $\alpha'\beta'$  identity, although it might still play a role in  
22 their final fate (Marchetti and Tavosanis, 2017). Ecdysone signaling in  $\alpha\beta$  neurons is also involved in  
23 quickly lowering Chinmo levels (Kucherenko et al., 2012; Wu et al., 2012).

24 In this study, we have focused on the three main classes of mushroom body neurons although at  
25 least 7 subtypes exist: 2  $\gamma$ , 2  $\alpha'\beta'$  and 3  $\alpha\beta$  (Aso et al., 2014; Shih et al., 2019). The subtypes are specified

1 sequentially (Aso et al., 2014) suggesting that each of the three broad mushroom body temporal windows  
2 can be subdivided further, either by fine-scale reading of the changing Imp and Syp gradients, by  
3 additional extrinsic cues, or perhaps by a tTF series as in other neuroblasts.

4

5

## 6 **Temporal patterning of *Drosophila* central brain neuroblasts**

7 Postembryonic central brain neuroblasts are long-lived and divide on average ~50 times. Unlike in other  
8 regions of the developing *Drosophila* brain, rapidly progressing series of tTFs have not yet been  
9 described in these neuroblasts (Doe, 2017; Holguera and Desplan, 2018; Kohwi and Doe, 2013; Rossi et  
10 al., 2017). Instead, they express Imp and Syp in opposing temporal gradients (Liu et al., 2015; Ren et al.,  
11 2017; Syed et al., 2017a). Conceptually, how Imp and Syp gradients translate into different neuronal  
12 identities through time has been compared to how morphogen gradients pattern tissues in space (Liu et al.,  
13 2019, 2015). During patterning of the anterior-posterior axis of the *Drosophila* embryo, the anterior  
14 gradient of the Bicoid morphogen and the posterior Nanos gradient are converted into discrete spatial  
15 domains that define cell fates (Briscoe and Small, 2015; Liu et al., 2019). Since gradients contain  
16 unlimited information, differences in Imp and Syp levels through time could translate into different  
17 neuronal types. Another intriguing possibility is that tTF series could act downstream of Imp and Syp,  
18 similarly to how the gap genes in the *Drosophila* embryo act downstream of the anterior-posterior  
19 morphogens. We have shown that another possibility is that temporal extrinsic cues can be incorporated  
20 by individual progenitors to increase neuronal diversity. In mushroom body neuroblasts Activin signaling  
21 acts directly on the intrinsic program, effectively converting two broad temporal windows into three to  
22 help define an additional neuronal type. We propose that subdividing the broad Imp and Syp temporal  
23 windows by extrinsic cues may be a simple way to increase neuronal diversity in other central brain  
24 neuroblasts.

25 We have also shown that Activin signaling times the Imp to Syp transition for mushroom body  
26 neuroblasts, similar to the function of ecdysone for other central brain neuroblasts (Syed et al., 2017a). In

1 both cases however, the switch still occurs, indicating that a separate independent clock continues to tick.  
2 This role for extrinsic cues during *Drosophila* neurogenesis is reminiscent of their roles on individual  
3 vertebrate progenitors. For example, hindbrain neural stem cells progressively produce motor neurons  
4 followed by serotonergic neurons before switching to producing glia (Chleilat et al., 2018; Dias et al.,  
5 2014). The motor neuron to serotonergic neuron switch is fine-tuned by TGF $\beta$  signaling. It would be  
6 interesting to determine if hindbrain neuronal subtypes are lost in TGF $\beta$  mutants, similar to how  $\alpha'$  $\beta'$   
7 identity is lost in the mushroom bodies in *babo* mutants.

8

### 9 **Ecdysone signaling is not necessary for $\alpha'$ $\beta'$ specification**

10 EcR is temporally expressed in mushroom body neurons at late L3. At this stage, both  $\gamma$  and  $\alpha'$  $\beta'$  neurons  
11 exist and new  $\alpha'$  $\beta'$  neurons are still being generated. The observation that EcR is not expressed in Mamo<sup>+</sup>  
12 cells at the time  $\alpha'$  $\beta'$  neurons are produced (*i.e.*, from mid L3) suggests that ecdysone signaling does not  
13 function in  $\alpha'$  $\beta'$  specification and does not regulate Mamo. The lack of a role for ecdysone in  $\alpha'$  $\beta'$   
14 specification is consistent with our observations that expression of *UAS-EcR-RNAi* or mutants for *usp* do  
15 not disrupt  $\alpha'$  $\beta'$  specification. In contrast, we and others have shown that expression of *UAS-EcR-DN*  
16 leads to the loss of  $\alpha'$  $\beta'$  neurons (Marchetti and Tavosanis, 2017) However, since we cannot detect EcR  
17 protein in Mamo<sup>+</sup> cells at L3 and only *UAS-EcR-DN* blocks  $\alpha'$  $\beta'$  specification by inhibiting Mamo at L3,  
18 we conclude that EcR-DN artifactually represses Mamo, leading to the loss of  $\alpha'$  $\beta'$  neurons.

19

### 20 **Glia are a source of the Activin ligand Myoglianin**

21 *myo* is temporally expressed in brain glia at L3 to initiate the remodeling of mushroom body  $\gamma$  neurons  
22 (Awasaki et al., 2011) and  $\alpha'$  $\beta'$  specification (Fig. 4) (Marchetti and Tavosanis, 2019). However,  
23 knocking-down Myo from glia is not as severe as removing Babo from mushroom body neuroblasts. This  
24 might be due to incomplete knockdown of *myo* or to other sources of Myo, potentially from neurons. In  
25 the vertebrate cortex, old neurons signal back to young neurons to control their number (Parthasarathy et



1 al., 2014; Seuntjens et al., 2009; Toma et al., 2014; Wang et al., 2016). It is also possible the Babo is  
2 activated by other Activin ligands, including Activin and Dawdle (Upadhyay et al., 2017).

3

4

5

## 6 **Conserved mechanisms of temporal patterning**

7 It is well established that extrinsic cues play important roles during vertebrate neurogenesis, either by  
8 regulating temporal competence of neural stem cells or by controlling the timing of temporal identity  
9 transitions (reviewed in Kawaguchi, 2019). Competence changes mediated by extrinsic cues were  
10 demonstrated in classic heterochronic transplantation studies that showed that young donor progenitors  
11 produce old neuronal types when placed in older host brains. (Desai and McConnell, 2000; Frantz and  
12 McConnell, 1996; McConnell, 1988). Recent studies show that the reverse is also true when old  
13 progenitors are placed in a young environment (Oberst et al., 2019).

14 Mechanisms of intrinsic temporal patterning are also conserved (Alsio et al., 2013; Elliott et al.,  
15 2008; Holguera and Desplan, 2018; Konstantinides et al., 2015; Mattar et al., 2015; Shen et al., 2006). For  
16 example, vertebrate retinal progenitor cells use an intrinsic tTF cascade to bias young, mid, and old retinal  
17 fates (Elliott et al., 2008; Liu et al., 2020; Mattar et al., 2015). Two of the factors (Ikaros and Casz1) used  
18 for intrinsic temporal patterning are orthologs to the *Drosophila* tTFs Hb and Cas. tTF series might also  
19 exist in cortical radial glia progenitors and even in the nerve cord (Delile et al., 2019; Gao et al., 2014;  
20 Llorca et al., 2019; Telley et al., 2016, 2019). Recent results also show the importance of post-  
21 transcriptional regulation in defining either young or old cortical fates (Shu et al., 2019; Zahr et al., 2018),  
22 which can be compared to the use of posttranscriptional regulators that are a hallmark of neuronal  
23 temporal patterning in *Drosophila* central brain neuroblasts. These studies highlight that the mechanisms  
24 driving the diversification of neuronal types are conserved.

25

26 **Acknowledgements:**

1 We would like to thank the fly community, the Bloomington and the DGRC stock centers for flies and  
2 reagents; Nikos Konstantinides for discussion throughout the project and comments on the manuscript.  
3 Tzumin Lee for sharing data prior to publication and for discussions; Tzumin Lee, Lynn Riddiford, Oren  
4 Schuldine, Cedric Maurange and Michael B. O'Connor for fly stocks and antibodies. We would like to  
5 thank all the Desplan lab members for their discussion and comments on the manuscript; Funding: This  
6 work was supported by grants from NIH (R01 EY017916 and R21 NS095288). A.M.R. was partly  
7 supported by funding from NIH (T32 HD007520), and by NYU's GSAS MacCracken Program and a  
8 Dean's Dissertation Fellowship.

9

#### 10 **Author contributions:**

11 Conceptualization, A.M.R. and C.D.; Investigation, A.M.R.; Writing - Original Draft, A.M.R.; Writing -  
12 Review and Editing, A.M.R. and C.D.; Data and materials availability: All data are available in the main  
13 text or supplementary materials.

14

#### 15 **Declaration of Interests:**

16 The authors declare no competing interests.

17

#### 18 **Figure titles and legends:**

19 **Fig. 1.  $\alpha'\beta'$  neurons are not generated from *babo* mutant neuroblasts. A.** Summary of intrinsic  
20 temporal patterning mechanism operating during mushroom body development. During early larval  
21 stages, mushroom body neuroblasts express high levels of Imp (red) and Chinmo (red) in neurons to  
22 specify  $\gamma$  identity for ~85 neuroblast divisions (red-dashed box). From mid L3 to metamorphosis, when  
23 Imp and Syp (cyan) are both at low levels, the same neuroblast divides ~40 times to produce  $\alpha'\beta'$  neurons  
24 (magenta-dashed box). Low Chinmo regulates the expression Mamo, a terminal selector of  $\alpha'\beta'$  identity.  
25 From the beginning of metamorphosis throughout pupal development, high Syp leads to  $\alpha\beta$  neurons

1 (cyan-dashed outline). **B.** Known molecular markers can distinguish between the three mushroom body  
2 neuronal types in the adult. **C.** Mushroom body projections originating from neurons born from four  
3 neuroblasts (numbered 1 to 4) per hemisphere fasciculate into a single bundle (peduncle) before  
4 branching into the five mushroom body lobes. The first-born  $\gamma$  neurons (red) remodel during development  
5 to project into a single, medial lobe in the adult. This lobe is the most anterior of the medial lobes. Axons  
6 from  $\alpha'\beta'$  neurons (magenta) bifurcate to project into the vertical and medial  $\alpha'$  and  $\beta'$  lobes. The  $\beta'$  lobe  
7 is posterior to the  $\gamma$  lobe. The last-born  $\alpha\beta$  neurons (cyan) also bifurcate their axons into the vertical  
8 projecting  $\alpha$  lobe and medial projecting  $\beta$  lobe. The  $\alpha$  lobe is positioned adjacent and medial to the  $\alpha'$   
9 lobe. The  $\beta$  lobe is the most posterior medial lobe. **D-E.** Representative max projections showing adult  
10 axons of clonally related neurons born from L1 stage in wildtype and *babo* conditions. *UAS-CD8::GFP* is  
11 driven by *mb-Gal4* (*OK107-Gal4*). Outlines mark  $GFP^+$  axons, where  $\gamma$  axons are outlined in red,  $\alpha'\beta'$   
12 axons are outlined in magenta, and  $\alpha\beta$  axons are outlined in cyan. A white box outlines the Inset panel.  
13 Trio (magenta) is used to label all  $\gamma$  and  $\alpha'\beta'$  axons for comparison to  $GFP^+$  axons. **D.** In wildtype,  $GFP^+$   
14 axons (green, outlined in red, magenta and cyan) are visible in all observable mushroom body lobes. **E.** In  
15 *babo* mutant clones,  $\gamma$  neurons (red outline) remain unpruned.  $GFP^+$  axons are missing inside the Trio<sup>+</sup>  $\alpha'$   
16 lobe, indicating the absence of  $\alpha'\beta'$  neurons. **F-G.** Representative, single z-slices from the adult cell body  
17 region of clones induced at L1 in wildtype and *babo* conditions. *UAS-CD8::GFP* is driven by *mb-Gal4*.  
18 **F.** Wildtype clones show the presence of strongly expressing Trio (magenta) and Mamo (blue, gray in  
19 single channel) neurons, indicative of  $\alpha'\beta'$  identity. **G.** In *babo* mutant clones, cells strongly expressing  
20 Trio and Mamo are not present. **H.** Quantification of MARCM clones marked by *mb-Gal4*, which labels  
21 all mushroom body neuronal types. The number of  $\alpha'\beta'$  neurons are quantified in wildtype (n=7) and  
22 *babo* (n=8) conditions. Plotted is the percentage of strong Mamo<sup>+</sup> and  $GFP^+$  cells (clonal cells) versus all  
23 Mamo<sup>+</sup> cells (clonal and non-clonal cells) within a single mushroom body. In wildtype, 25.5% of the total  
24 strong Mamo expressing cells ( $\alpha'\beta'$  neurons) are within a clone, consistent with our expectation since  
25 each mushroom body is made from four neuroblasts. In *babo* clones, only 2.2% of  $\alpha'\beta'$  neurons are

1 within a clone. **H'**. There are no significant differences between the average clone sizes (wildtype:533.6;  
2 *babo*:551.3). **I.** Quantification of  $\gamma$  neurons marked by  $\gamma Gal4$  (*71G10-Gal4*) in MARCM clones. Plotted  
3 is the total number of  $\gamma$  neurons marked by GFP and Trio in wildtype (n=10) and *babo* mutant (n=12)  
4 clones. In wildtype, the average number of  $\gamma$  neurons is 154.3. In *babo* mutants, the average is 178.4. **J.**  
5 Quantification of  $\alpha'\beta'$  neurons marked by  $\alpha'\beta'-Gal4$  (*41C07-Gal4*) in MARCM clones. Plotted is the  
6 total number of  $\alpha'\beta'$  neurons marked by GFP and strong Trio in wildtype (n=4) and *babo* mutant (n=8)  
7 clones. In wildtype, the average number of  $\alpha'\beta'$  neurons is 81.5. In *babo* mutants, the average is 2.1. **K.**  
8 Quantification of  $\alpha\beta$  neurons marked by  $\alpha\beta-Gal4$  (*44E04-Gal4*) in MARCM clones. Plotted is the total  
9 number of GFP<sup>+</sup> cells in wildtype (n=7) and *babo* mutant (n=8) clones. In wildtype, the average number  
10 is 276. In *babo* mutants, the average number is 228.9. A two-sample, two-tailed t-test was performed.  
11 \*\*\*p<0.001, \*\*p<0.01, ns: not significant. Scale bars: D, 20 $\mu$ m; F, 5 $\mu$ m.

12  
13 **Fig. 2. Activin signaling acts in neuroblasts to lower Imp levels.** **A.** Representative image of a *babo*  
14 mushroom body neuroblast marked by *UAS-CD8::GFP* driven by *mb-Gal4* (red box) adjacent to a  
15 wildtype neuroblast (green-dashed box) in the same focal plane from a wandering L3 stage brain,  
16 immunostained for Imp (blue, gray in single channel) and Syp (magenta). **B.** Close-up view of wildtype  
17 neuroblast (green-dashed box in **A**). **C.** Close up view of *babo* mutant neuroblast (red box in **A**). **D.**  
18 Quantification of the Imp to Syp ratio in *babo* neuroblasts (n=9 from 4 different brains) compared to  
19 wildtype (n=23 from the same 4 brains as *babo* neuroblasts). A two-sample, two-tailed t-test was  
20 performed. \*\*\*p<0.001, ns: not significant. Scale bar: 10 $\mu$ m.

21  
22 **Fig. 3. Activin signaling is sufficient to expand production of  $\alpha'\beta'$  neurons.** **A.** Expression of *UAS-*  
23 *Babo-Act* by *mb-Gal4* leads to additional  $\alpha'\beta'$  neurons but does not convert all mushroom body neurons  
24 into this fate. **B.** Plotted is the percentage of strong Mamo<sup>+</sup> and GFP<sup>+</sup> cells (clonal cells) versus all Mamo<sup>+</sup>  
25 cells (clonal and non-clonal cells) within a single mushroom body. The number of  $\alpha'\beta'$  neurons is

1 quantified in wildtype (n=7, replotted from data in Figure 1H ) and *UAS-babo-Act* (n=4). In wildtype,  
2 25.5% of the total strong Mamo expressing cells ( $\alpha'\beta'$  neurons) are within a clone while precociously  
3 activating the Activin pathway increased the percentage to 32%. **C.** A representative image of a  
4 wandering L3 brain in which a single mushroom body neuroblast is expressing *UAS-babo-Act* driven by  
5 *mb-Gal4* (white-dashed line). Imp (blue) and Syp (magenta), along with GFP (green), are used to identify  
6 mushroom body neuroblasts (asterisks). **D.** Inset (gray box in **C**) showing that Mamo (gray) is expressed  
7 inside GFP<sup>+</sup> cells that express *UAS-babo-Act* but not outside in adjacent wildtype mushroom body  
8 neurons (yellow line) (n=3/3). A two-sample, two-tailed t-test was performed. \*\*\*p<0.001.

9  
10 **Fig. 4. Glia are the source of the Activin ligand Myo to specify  $\alpha'\beta'$  neurons. A-B.** Representative  
11 images of adult mushroom body lobes labeled by FasII (green) and Trio (magenta). **A.** In wildtype  
12 controls (428.9, (n=10) (*repo-Gal4* only) all three neuronal types are present based on axonal projections.  
13 **B.** Expressing *UAS-myo-RNAi* (106.6, n=10) causes  $\gamma$  neurons not to remodel and to the loss of the  
14 majority of  $\alpha'\beta'$  neurons, however some still remain (purple arrow, FasII- region). **C-D.** Representative  
15 images of adult mushroom body cell body region. Trio (magenta) and Mamo (gray) are used to  
16 distinguish between the three neuronal types. Expressing *UAS-myo-RNAi* leads to loss of the majority of  
17 strong Mamo<sup>+</sup> and Trio<sup>+</sup> cells, indicating the loss of  $\alpha'\beta'$  neurons. **E.** Quantification of phenotype  
18 presented in **A-D**. **F.** At L3, EcR (magenta) and Mamo (gray) are expressed in mushroom body neurons  
19 labeled by Eyeless (green, yellow outline). Mamo<sup>+</sup> cells are  $\alpha'\beta'$  neurons. **G.** Expressing *UAS-myo-RNAi*  
20 with *repo-Gal4* leads to loss of both Mamo and EcR in mushroom body neurons. A two-sample, two-  
21 tailed t-test was performed. \*\*\*p<0.001.

22  
23 **Fig. 5.  $\alpha'\beta'$  neurons are specified by low Imp levels at L3. A-A'.** Representative image of wildtype  
24 mushroom body neurons labeled by *mb-Gal4* driving *UAS-CD8::GFP* (green, white-dashed outline)  
25 during the wandering L3 stage. Mamo (gray) is used as a marker for  $\alpha'\beta'$  neurons. **B-B'.** When *mb-Gal4*

1 is used to drive *UAS-Imp-RNAi*, Mamo is not expressed. **C-C'**. Similarly, Mamo expression is lost when  
2 overexpressing *Imp* (*UAS-Imp-overexpression (OE)*). **D-D'**. Expressing *UAS-Syp-RNAi* also leads to the  
3 loss of Mamo. **E**. Expressing *UAS-Syp-overexpression (OE)* does not affect Mamo. Scale bar: 5 $\mu$ m.  
4  
5 **Fig. 6. Ecdysone signaling is not necessary for  $\alpha'\beta'$  specification. A-B.** Representative max projections  
6 showing adult axons of clonally related neurons born from L1 stage in wildtype and *UAS-EcR-DN*  
7 conditions. *UAS-CD8::GFP* is driven by *mb-Gal4 (OK107-Gal4)*. Outlines mark GFP<sup>+</sup> axons, where  $\gamma$   
8 axons are outlined in red,  $\alpha'\beta'$  axons are outlined in magenta, and  $\alpha\beta$  axons are outlined in cyan. A white  
9 box outlines the Inset panel. Trio (magenta) is used to label all  $\gamma$  and  $\alpha'\beta'$  axons for comparison to GFP<sup>+</sup>  
10 axons. **A**. In wildtype, GFP<sup>+</sup> axons are visible in all mushroom body lobes. **B**.  $\alpha'\beta'$  axons are lost, and  $\gamma$   
11 neurons do not remodel, in *UAS-EcR-DN* expressing clones. **C-D**. Representative, single z-slices from the  
12 adult cell body region of clones induced at L1 in wildtype and *UAS-EcR-DN* conditions. *UAS-CD8::GFP*  
13 is driven by *mb-Gal4*. **C**. Wildtype clones show the presence of strongly expressing Trio (magenta) and  
14 Mamo (blue, gray in single channel) neurons, indicative of  $\alpha'\beta'$  identity. **D**. In *UAS-EcR-DN* clones,  
15 strong Trio and Mamo cells are not present. **E**. Quantification of MARCM clones marked by *mb-Gal4*,  
16 which labels all mushroom body neuronal types. The number of  $\alpha'\beta'$  neurons are quantified in wildtype  
17 (n=7, replotted from data in Figure 1H) and *UAS-EcR-DN* (n=6) conditions. Plotted is the percentage of  
18 strong Mamo<sup>+</sup> and GFP<sup>+</sup> cells (clonal cells) versus all Mamo<sup>+</sup> cells (clonal and non-clonal cells) within a  
19 single mushroom body. In wildtype, 25.5% of the total strong Mamo expressing cells ( $\alpha'\beta'$  neurons) are  
20 within a clone. In *UAS-EcR-DN* clones, only 3.4% of  $\alpha'\beta'$  neurons are within a clone. **F**. *usp* mutant  
21 clones contain  $\alpha'\beta'$  neurons. FasII (magenta) is used to label  $\gamma$  and  $\alpha\beta$  lobes. Red arrow indicates  
22 unpruned  $\gamma$  neurons. **G**. Representative image of an *UAS-EcR-DN* expressing neuroblast marked by *UAS-*  
23 *CD8::GFP* driven by *mb-Gal4* (red box) ventral to a wildtype neuroblast (green-dashed box) from the  
24 same wandering L3 stage brain, immunostained for *Imp* (blue, gray in single channel) and *Syp* (magenta).  
25 **H**. Close-up view of wildtype neuroblast (green-dashed box in **G**). **I**. Close-up view of *UAS-EcR-DN*

1 neuroblast (red box in **G**). **J**. Quantification of the Imp to Syp ratio in *UAS-EcR-DN* neuroblasts (n=4  
2 from 4 different brains) compared to wildtype (n=27 from the same 4 brains as *UAS-EcR-DN*  
3 neuroblasts). **K**. A representative adult mushroom body clone (green) induced at L1 expressing *UAS-EcR-*  
4 *DN* driven by *mb-Gal4*.  $\alpha'\beta'$  neurons (GFP<sup>+</sup> (green), FasII<sup>-</sup> (magenta)) are not observed and  $\gamma$  neurons do  
5 not remodel (GFP<sup>+</sup>, FasII<sup>+</sup>, red outline). **L**. A representative adult wildtype clone induced at L1 driven by  
6 *NB + mb2-Gal4*. All three neuron types are present, including  $\alpha'\beta'$  neurons (GFP<sup>+</sup>, FasII<sup>-</sup>, magenta  
7 outline). **M**.  $\alpha'\beta'$  neurons are also present when *UAS-EcR-DN* is driven by *NB + mb2-Gal4* although  $\gamma$   
8 neurons do not remodel. **N**. Quantification of MARCM clones in which *UAS-EcR-DN* is driven by *mb-*  
9 *Gal4* (n=6, replotted from data in **E**) or *NB + mb2-Gal4* (n=6) compared to wildtype (n=7, replotted from  
10 data in Figure 1H). In *UAS-EcR-DN* clones driven by *NB + mb2-Gal4*, 24.6% of  $\alpha'\beta'$  neurons are within  
11 a clone, similar to wildtype. **O**. At L3, Mamo (gray) is expressed in young mushroom body neurons  
12 ( $\alpha'\beta'$ ) while EcR (magenta) can only be detected in more mature neurons (mainly  $\gamma$  at this stage). **P**.  
13 Expressing *UAS-EcR-DN* with *mb-Gal4* (green, white outline) leads to the loss of Mamo expression  
14 (gray) inside the clone but not in surrounding wildtype mushroom body neurons. **Q**. In contrast,  
15 expressing *UAS-EcR-RNAi* driven by *mb-Gal4* abolishes EcR expression but does not affect Mamo. For **E**  
16 and **J** a two-sample, two-tailed t-test was performed. For **N**, a Tukey test was performed. \*\*\*p<0.001, ns:  
17 not significant. Scale bars: A, 20 $\mu$ m; G, 10 $\mu$ m; P, 5 $\mu$ m.

18

19 **Fig. 7. Model of how Activin signaling defines the  $\alpha'\beta'$  temporal identity window.** In wildtype, as  
20 development proceeds, mushroom body neuroblasts incorporate an Activin signal (Myo) from glia  
21 through Babo to lower the level of the intrinsic temporal factor Imp (magenta dashed line). The lower Imp  
22 levels inherited by newborn neurons leads to lower Chinmo levels to control the expression of the  $\alpha'\beta'$   
23 effector Mamo, defining the mid-temporal window (magenta dashed lines). In *babo* mutants, Imp remains  
24 higher for longer, leading to the loss of Mamo (and likely many other targets) during mid-late L3 in

1 neurons. In this scenario,  $\gamma$  neuron numbers increase,  $\alpha'\beta'$  neurons are lost, and fewer  $\alpha\beta$  neurons are  
2 produced. The Imp to Syp transition still occurs, allowing for young ( $\gamma$ ) and old ( $\alpha\beta$ ) fates to be produced.

3

#### 4 **Methods:**

##### 5 ***Drosophila* strains and MARCM**

6 Flies were kept on standard cornmeal medium at 25°C. For MARCM experiments, embryos were  
7 collected every 12 hours. After 24 hours, L1 larvae were placed at 37°C for 2 hours for neuroblast clones  
8 or 15 minutes for GMC clones. To target GMCs at L3, larvae were aged for 84 hours and then placed at  
9 37°C for 15 minutes. Brains were dissected from 1-5 day old adults.

10

11 We used the following transgenic and mutant flies in combination or recombined in this study. { } enclose  
12 individual genotypes, separated by commas. Stock numbers refers to BDSC unless otherwise stated:

13 {y, w, UAS-mCD8::GFP, hsFlp; FRTG13, tub-Gal80/CyO; ; OK107-Gal4 (gift from Oren Schuldiner)},  
14 {hsFLP, y, w; FRTG13, UAS-mCD8::GFP (#5131)}, {hsFLP, tubP-GAL80, w, FRT19A; UAS-  
15 mCD8::GFP/CyO; OK107-Gal4 (#44407)}, {hsFLP, y, w, UAS-mCD8::GFP; FRT82B, tubP-  
16 GAL80/TM3, Sb<sup>1</sup>; OK107-Gal4 (#44408)}, {hsFLP, y<sup>1</sup>, w\*, UAS-mCD8::GFP; tubP-GAL80, FRT40A;  
17 OK107-Gal4 (#44406)}, {UAS-EcR.B1-DeltaC655.W650A (#6872)}, {y, w, FRT19A (#1744)},  
18 {FRTG13, babo<sup>52</sup> (gift from Dr. Michael B. O'Connor)}, {w; FRTG13 (#1956)}, {w<sup>1118</sup>; repo-  
19 Gal4/TM3, Sb<sup>1</sup> (#7415)}, {w; GMR71G10-GAL4 (#39604)}, {w; GMR41C07-GAL4/TM3, Sb<sup>1</sup> (#48145)},  
20 {w; GMR13F02-GAL4 (#48571)}, {w; GMR44E04-GAL4 (#50210)}, {w\*; insc-Gal4<sup>Mz1407</sup> (#8751)},  
21 {usp<sup>2</sup>/FM7a (#31414)}, {Met<sup>27</sup>, gce<sup>2.5K</sup>/FM7c, 2xTb<sup>1</sup>-RFP, sn<sup>+</sup> (gift from Dr. Lynn Riddiford)}, {y<sup>d2</sup>,  
22 w<sup>1118</sup>, ey-FLP; tai<sup>EY11718</sup> FRT40A/CyO, y<sup>+</sup> (DGRC #114680)}, {dpy<sup>ov1</sup>, tai<sup>61G1</sup>, FRT40A/CyO (#6379)},  
23 {w\*; smo<sup>119B6</sup>, al<sup>1</sup>, dpy<sup>ov1</sup>, b<sup>1</sup>, FRT40A/CyO (#24772)}, {FRT82B, svp<sup>1</sup>/TM3 (gift from Tzumin Lee)}, {y<sup>1</sup>,  
24 w\*, UAS-mCD8::GFP, Smox<sup>MB388</sup>, FRT19A/FM7c (#44384)}, {w\*;; UAS-p35 (#5073)}, {y<sup>1</sup>, w; Mi{PT-  
25 GFSTF.1}EcR[MI05320-GFSTF.1]/SM6a, (#59823)}, {y<sup>1</sup>, w\*; Pin<sup>Yt</sup>/CyO; UAS-mCD8::GFP (#5130)},



1 {w\*; ; *UAS-EcR.B1* (#6469)}, {y, w; ; *UAS-babo-a/TM6* (gift from Dr. Michael O'Connor)}, {*UAS-Imp-*  
2 *RNAi* (#34977)}, {*UAS-Imp-RM-Flag* (gift from Dr. Tzumin Lee)}, {*UAS-Syp-RNAi* (VDRC 33012, gift  
3 from Dr. Tzumin Lee)}, {*UAS-Syp-RB-HA* (gift from Dr. Tzumin Lee)}, {y<sup>l</sup>, v<sup>l</sup>; *UAS-myoglianin-RNAi*  
4 (#31200)}, {w\*; *OK107-Gal4 /In<sup>4</sup>, ci<sup>D</sup>* (#854)}; {w, *UAS-EcR-RNAi* (#9326)}; {w, *UAS-EcR-RNAi*  
5 (#9327)}; {yw, *UAS-babo.Q302D* (#64293)}.

6

## 7 **Immunohistochemistry and microscopy**

8 Fly brains were dissected in ice-cold PBS and fixed for 15-20 minutes in 4% Formaldehyde (v/w) in  
9 1XPBS. Following a 2 hour wash in PBST (1XPBS + 0.3% Triton X-100), brains were incubated for 1-2  
10 days in primary antibodies diluted in PBST, followed by overnight with secondary antibodies diluted in  
11 PBST. After washes, brains were mounted in Slowfade (Life Technologies) and imaged on either a Leica  
12 SP5 or SP8 confocal. Images were processed in Fiji and Adobe Illustrator (CC18).

13

14 We used the following antibodies in this study:

15 sheep anti-GFP (1:500, Bio-Rad #4745-1051), mouse anti-Trio (1:50, DSHB #9.4A anti-Trio), guinea pig  
16 anti-Mamo (1:200, this study, Genscript), mouse anti-FasII (1:50, DSHB #1D4 anti-Fasciclin II), rat anti-  
17 Imp (1:200, this study, Genscript), rabbit anti-Syp (1:200, this study, Genscript), guinea pig anti-Dpn  
18 (1:1000, Genscript), rabbit anti-FasII (1:50, this study, Genscript), mouse anti-EcR-B1 (1:20, DSHB  
19 #AD4.4(EcR-B1)), mouse anti-Dac2-3 (1:20, DSHB #mAbdac2-3), guinea pig anti-Chinmo (1:200, this  
20 study, Genscript), rat anti-Chinmo (1:200, gift from Dr. Cedric Maurange ), rat anti-DNcad (1:20, DSHB  
21 #DN-Ex #8), donkey anti-sheep Alexa 488 (1:500, Jackson ImmunoResearch #713-545-147), donkey  
22 anti-mouse Alexa 555 (1:400, Thermo Scientific #A-31570), donkey anti-rabbit Alexa 555 (1:400,  
23 Thermo Scientific #A-31572), donkey anti-rat Alexa 647 (1:400, Jackson Immunochemicals #712-605-  
24 153), donkey anti-guinea pig Alexa 647 (1:400, Jackson Immunochemicals #706-605-148), donkey anti-  
25 rabbit 405 (1:100, Jackson Immunochemicals #711-475-152), donkey anti-rat Cy3 (1:400, Jackson

1 Immunochemicals #712-165-153), donkey anti-mouse 405 (1:100, Jackson Immunochemicals # #711-  
2 475-150).

3  
4 Polyclonal antibodies were generated by Genscript (<https://www.genscript.com/>). The epitopes used for  
5 each immunization are listed below.

6  
7 Mamo: amino acids 467-636 of the full length protein:  
8 MDDRLEQDVDEEDLDDDDVVVVG PATAMARGIAQRLAHQNLQRLHHTHHHAHQHQHSQHHPH  
9 SQHHHTPHHQHHHTHSDDDEDAMPVIAKSEILDDDDYDDEMDLEDDDEADNSSNDLGLNMKMGS  
10 GGAGGGGGVDLSTGSTLIPSLITLPSSSAAAAAAAAAAMESQRSTPHHHHHH

11  
12 Imp: amino acids 76-455 (of isoform PB) of the full length protein:  
13 ADFPLRILVQSEMVGAIIGRQGSTIRITITQQSRARVDVHRKENVGSLEKSITIYGNPENCTNACKRI  
14 LEVMQQEAISTNKGEICKILAHNNLIGRIIGKSGNTIKRIMQD TDTKITVSSINDINSFNLERIITVK  
15 GLIENMSRAENQISTKLRQSYENDLQAMAPQSLMFPGLHPMAMMSTPGNGMVFNTPMPFPSCQ  
16 SFAMSKTPASVVPVFPNDLQETTYLYIPNNAVGAIIGTRGSHIRSIMRFSNASLKIAPLDADKPLD  
17 QQTERKVTIVGTPEGQWKAQYMIFEKMREEGFMCGTDDVRLTVELLVASSQVGRIGKGGQNV  
18 RELQRVTG SVIKLPEHALAPPSGGDEETPVHIIGLFYVQSAQRRIRAMML

19  
20 Syp: amino acids 35-231(of isoform PA) of the full length protein:  
21 MAEGNGELLDDINQKADDRGDGERTEDYPKLLEYGLDKKVAGKLDEIYKTGKLAHAELDERAL  
22 DALKEFPVDGALNVLGQFLESNLEHVSNKSAYL CGVMKTYRQKSRASQQGVAAPATVKGPDED  
23 KIKKILERTGYTLDVTTGQRKYGGPPPHWEGNVPNGCEVFCGKIPKDMYEDELIPLFENCGIHW  
24 DLRLMM

25  
26 FasII: amino acids 770-873 (of isoform PA) of the full length protein:

1 MHHHHHHDLLCCITVHMGVMATMCRKAKRSPSEIDDEAKLGSGQLVKEPPPSPLPLPPPVKLGG

2 SPMSTPLDEKEPLRTPGSIKQNSTIEFDGRFVHSRSGEIIGKNSAV

3

4 Chinmo: amino acids 494-604 (of isoform PF) of the full length protein:

5 MLNVWNATKMNNKNSVNTADGKKLKCLYCDRLYGYETNLRAHIRQRHQGIRVPCPCERTFTR

6 NNTVRRHIAREHKQEIGLAAGATIAPAHLAAAAAASAAATAAAS NHSPHHHHHH

7

### 8 **Cell counts quantification**

9 All confocal images were taken with a step size of three microns. Using Fiji, each image was cropped to  
10 limit the area to a region containing mostly mushroom body cell bodies. In all cases, GFP<sup>+</sup> cells were  
11 manually counted. To count  $\alpha'$  $\beta'$  neurons, images were split into their individual channels and the  
12 channel containing Mamo staining was automatically binarized to account for weak and strong Mamo  
13 expression using either Default or RenyiEntropy thresholding. Binarized images were processed further  
14 using the Watershed method to differentiate between contacting cells. The number of particles (*i.e.*, strong  
15 Mamo cells) measuring between 50-infinity squared pixels were automatically counted using the Analyze  
16 Particles function and a separate channel containing bare outlines of the counts was produced and  
17 inverted. This method automatically produced the total number of strong Mamo<sup>+</sup> cells. Individual  
18 channels were then remerged. Outlines drawn from the Analyze Particles function that overlapped with  
19 GFP<sup>+</sup> cells were defined as  $\alpha'$  $\beta'$  neurons within a clone. In the eight cases where two mushroom body  
20 neuroblasts were labeled in a single hemisphere (wildtype:1; *babo*, *UAS-EcR*: 3; *babo*, *UAS-Syp*: 2), the  
21 total number of  $\alpha'$  $\beta'$  neurons within clones was divided by 2.

22

### 23 **Imp and Syp fluorescence quantification**

24 All brains used for quantifying Imp and Syp fluorescence values in *babo* or *UAS-EcR-DN* mutants were  
25 prepared together. Additionally, all images used for quantification were imaged using the same confocal

1 settings for each channel. Fluorescence measurements were made in Fiji. Values for Imp and Syp were  
2 measured within the same hand-drawn area encompassing the entire neuroblast from a single z-slice.

3

#### 4 **Statistics**

5 Statistical tests were performed in Excel or R. The exact tests used are reported in the figure legends. In  
6 all cases, whisker plots represent the minimum value (bottom whisker), first quartile (bottom of box to  
7 middle line), inclusive median (middle line), third quartile (middle line to top of box) and maximum value  
8 (top whisker). The “x” represents the average value. Outliers are 1.5 times the distance from the first and  
9 third quartile.

10

#### 11 **References:**

12 Alsio, J.M., Tarchini, B., Cayouette, M., and Livesey, F.J. (2013). Ikaros promotes early-born neuronal  
13 fates in the cerebral cortex. *Proc. Natl. Acad. Sci. 110*, E716–E725.

14 Alyagor, I., Berkun, V., Keren-Shaul, H., Marmor-Kollet, N., David, E., Maysel, O., Issman-Zecharya,  
15 N., Amit, I., and Schuldiner, O. (2018). Combining Developmental and Perturbation-Seq Uncovers  
16 Transcriptional Modules Orchestrating Neuronal Remodeling. *Dev. Cell 47*, 38-52.e6.

17 Aso, Y., Hattori, D., Yu, Y., Johnston, R.M., Iyer, N.A., Ngo, T.-T.B., Dionne, H., Abbott, L.F., Axel, R.,  
18 Tanimoto, H., et al. (2014). The neuronal architecture of the mushroom body provides a logic for  
19 associative learning. *Elife 3*, e04577.

20 Awasaki, T., Saito, M., Sone, M., Suzuki, E., Sakai, R., Ito, K., and Hama, C. (2000). The *Drosophila* trio  
21 plays an essential role in patterning of axons by regulating their directional extension. *Neuron 26*, 119–  
22 131.

23 Awasaki, T., Huang, Y., O’Connor, M.B., and Lee, T. (2011). Glia instruct developmental neuronal  
24 remodeling through TGF- $\beta$  signaling. *Nat. Neurosci. 14*, 821–823.

25 Baumann, A.A., Texada, M.J., Chen, H.M., Etheredge, J.N., Miller, D.L., Picard, S., Warner, R., Truman,  
26 J.W., and Riddiford, L.M. (2017). Genetic tools to study juvenile hormone action in *Drosophila*. *Sci. Rep.*

- 1 7, 2132.
- 2 Briscoe, J., and Small, S. (2015). Morphogen rules: Design principles of gradient-mediated embryo  
3 patterning. *Dev.* *142*, 3996–4009.
- 4 Brummel, T., Abdollah, S., Haerry, T.E., Shimell, M.J., Merriam, J., Raftery, L., Wrana, J.L., and  
5 O'Connor, M.B. (1999). The *Drosophila* activin receptor Baboon signals through dSmad2 and controls  
6 cell proliferation but not patterning during larval development. *Genes Dev.* *13*, 98–111.
- 7 Cepko, C. (2014). Intrinsically different retinal progenitor cells produce specific types of progeny. *Nat.*  
8 *Rev. Neurosci.* *15*, 615–627.
- 9 Chai, P.C., Liu, Z., Chia, W., and Cai, Y. (2013). Hedgehog Signaling Acts with the Temporal Cascade to  
10 Promote Neuroblast Cell Cycle Exit. *PLoS Biol.* *11*.
- 11 Chleilat, E., Skatulla, L., Rahhal, B., Hussein, M.T., Feuerstein, M., Kriegelstein, K., and Roussa, E.  
12 (2018). TGF- $\beta$  Signaling Regulates Development of Midbrain Dopaminergic and Hindbrain Serotonergic  
13 Neuron Subgroups. *Neuroscience* *381*, 124–137.
- 14 Cognigni, P., Felsenberg, J., and Waddell, S. (2018). Do the right thing: neural network mechanisms of  
15 memory formation, expression and update in *Drosophila*. *Curr. Opin. Neurobiol.* *49*, 51–58.
- 16 Connolly, J.B., Roberts, I.J.H., Armstrong, J.D., Kaiser, K., Forte, M., Tully, T., and O'Kane, C.J. (1996).  
17 Associative learning disrupted by impaired Gs signaling in *Drosophila* mushroom bodies. *Science* (80-.).  
18 *274*, 2104–2107.
- 19 Crittenden, J.R., Skoulakis, E.M.C., Han, K.-A., Kalderon, D., and Davis, R.L. (1998). Tripartite  
20 Mushroom Body Architecture Revealed by Antigenic Markers. *Learn. Mem.* *5*, 38–51.
- 21 Croset, V., Treiber, C.D., and Waddell, S. (2018). Cellular diversity in the *Drosophila* midbrain revealed  
22 by single-cell transcriptomics. *Elife* *7*, e34550.
- 23 Delile, J., Rayon, T., Melchionda, M., Edwards, A., Briscoe, J., and Sagner, A. (2019). Single cell  
24 transcriptomics reveals spatial and temporal dynamics of gene expression in the developing mouse spinal  
25 cord. *Development* *146*.
- 26 Desai, A.R., and McConnell, S.K. (2000). Progressive restriction in fate potential by neural progenitors

- 1 during cerebral cortical development. *Development* *127*, 2863–2872.
- 2 Dias, J.M., Alekseenko, Z., Applequist, J.M., and Ericson, J. (2014). Tgfb $\beta$  Signaling Regulates Temporal  
3 Neurogenesis and Potency of Neural Stem Cells in the CNS. *Neuron* *84*, 927–939.
- 4 Doe, C.Q. (2017). Temporal Patterning in the Drosophila CNS. *Annu. Rev. Cell Dev. Biol.* *33*, 219–240.
- 5 Elliott, J., Jolicoeur, C., Ramamurthy, V., and Cayouette, M. (2008). Ikaros Confers Early Temporal  
6 Competence to Mouse Retinal Progenitor Cells. *Neuron* *60*, 26–39.
- 7 Frantz, G.D., and McConnell, S.K. (1996). Restriction of late cerebral cortical progenitors to an upper-  
8 layer fate. *Neuron* *17*, 55–61.
- 9 Gao, P., Postiglione, M.P., Krieger, T.G., Hernandez, L., Wang, C., Han, Z., Streicher, C., Papusheva, E.,  
10 Insolera, R., Chugh, K., et al. (2014). Deterministic Progenitor Behavior and Unitary Production of  
11 Neurons in the Neocortex. *Cell* *159*, 775–788.
- 12 Hige, T. (2018). What can tiny mushrooms in fruit flies tell us about learning and memory? *Neurosci.*  
13 *Res.* *129*, 8–16.
- 14 Holguera, I., and Desplan, C. (2018). Neuronal specification in space and time. *Science* (80-. ). *362*, 176–  
15 180.
- 16 Homem, C.C.F., Steinmann, V., Burkard, T.R., Jais, A., Esterbauer, H., and Knoblich, J.A. (2014).  
17 Ecdysone and Mediator Change Energy Metabolism to Terminate Proliferation in Drosophila Neural  
18 Stem Cells. *Cell* *158*, 874–888.
- 19 Issman-Zecharya, N., and Schuldiner, O. (2014). The PI3K class III complex promotes axon pruning by  
20 downregulating a ptc-derived signal via endosome-lysosomal degradation. *Dev. Cell* *31*, 461–473.
- 21 Ito, K., Awano, W., Suzuki, K., Hiromi, Y., and Yamamoto, D. (1997). The Drosophila mushroom body  
22 is a quadruple structure of clonal units each of which contains a virtually identical set of neurones and  
23 glial cells. *Development* *124*, 761–771.
- 24 Jefferis, G.S.X.E., Marin, E.C., Stocker, R.F., and Luo, L. (2001). Target neuron prespecification in the  
25 olfactory map of Drosophila. *Nature* *414*, 204–208.
- 26 Jefferis, G.S.X.E., Potter, C.J., Chan, A.M., Marin, E.C., Rohlfsing, T., Maurer, C.R., and Luo, L. (2007).

- 1 Comprehensive Maps of *Drosophila* Higher Olfactory Centers: Spatially Segregated Fruit and Pheromone  
2 Representation. *Cell* 128, 1187–1203.
- 3 Jenett, A., Rubin, G.M., Ngo, T.T., Shepherd, D., Murphy, C., Dionne, H., Pfeiffer, B.D., Cavallaro, A.,  
4 Hall, D., Jeter, J., et al. (2012). A GAL4-driver line resource for *Drosophila* neurobiology. *Cell Rep* 2,  
5 991–1001.
- 6 Kao, C.-F., Yu, H.-H., He, Y., Kao, J.-C., and Lee, T. (2012). Hierarchical Deployment of Factors  
7 Regulating Temporal Fate in a Diverse Neuronal Lineage of the *Drosophila* Central Brain. *Neuron* 73,  
8 677–684.
- 9 Kawaguchi, A. (2019). Temporal patterning of neocortical progenitor cells: How do they know the right  
10 time? *Neurosci. Res.* 138, 3–11.
- 11 Kohwi, M., and Doe, C.Q. (2013). Temporal fate specification and neural progenitor competence during  
12 development. *Nat. Rev. Neurosci.* 14, 823–838.
- 13 Konstantinides, N., Rossi, A.M., and Desplan, C. (2015). Common Temporal Identity Factors Regulate  
14 Neuronal Diversity in Fly Ventral Nerve Cord and Mouse Retina. *Neuron* 85, 447–449.
- 15 Kraft, K.F., Massey, E.M., Kolb, D., Walldorf, U., and Urbach, R. (2016). Retinal homeobox promotes  
16 cell growth, proliferation and survival of mushroom body neuroblasts in the *Drosophila* brain. *Mech.*  
17 *Dev.* 142, 50–61.
- 18 Kucherenko, M.M., Barth, J., Fiala, A., and Shcherbata, H.R. (2012). Steroid-induced microRNA *let-7*  
19 acts as a spatio-temporal code for neuronal cell fate in the developing *Drosophila* brain. *EMBO J.* 31,  
20 4511–4523.
- 21 Kunz, T., Kraft, K.F., Technau, G.M., and Urbach, R. (2012). Origin of *Drosophila* mushroom body  
22 neuroblasts and generation of divergent embryonic lineages. *Development* 139, 2510–2522.
- 23 Kurusu, M., Maruyama, Y., Adachi, Y., Okabe, M., Suzuki, E., and Furukubo-Tokunaga, K. (2009). A  
24 conserved nuclear receptor, *Tailless*, is required for efficient proliferation and prolonged maintenance of  
25 mushroom body progenitors in the *Drosophila* brain. *Dev. Biol.* 326, 224–236.
- 26 Lee, T., and Luo, L. (1999). Mosaic analysis with a repressible neurotechnique cell marker for studies of

- 1 gene function in neuronal morphogenesis. *Neuron* 22, 451–461.
- 2 Lee, T., Lee, A., and Luo, L. (1999). Development of the *Drosophila* mushroom bodies: sequential  
3 generation of three distinct types of neurons from a neuroblast. *Development* 126, 4065–4076.
- 4 Lee, T., Marticke, S., Sung, C., Robinow, S., and Luo, L. (2000). Cell-autonomous requirement of the  
5 USP/EcR-B ecdysone receptor for mushroom body neuronal remodeling in *Drosophila*. *Neuron* 28, 807–  
6 818.
- 7 Lee, Y.-J., Yang, C.-P., Miyares, R.L., Huang, Y.-F., He, Y., Ren, Q., Chen, H.-M., Kawase, T., Ito, M.,  
8 Otsuna, H., et al. (2020). Conservation and divergence of related neuronal lineages in the *Drosophila*  
9 central brain. *Elife* 9.
- 10 Lin, S., Lai, S.-L., Yu, H.-H., Chihara, T., Luo, L., and Lee, T. (2010). Lineage-specific effects of  
11 Notch/Numb signaling in post-embryonic development of the *Drosophila* brain. *Development* 137, 43–  
12 51.
- 13 Liu, L., Long, X., Yang, C., Miyares, R.L., Sugino, K., Singer, R.H., and Lee, T. (2019). Mamo decodes  
14 hierarchical temporal gradients into terminal neuronal fate. *Elife* 8, 1–28.
- 15 Liu, S., Liu, X., Li, S., Huang, X., Qian, H., Jin, K., and Xiang, M. (2020). Foxn4 is a temporal identity  
16 factor conferring mid/late-early retinal competence and involved in retinal synaptogenesis. *Proc. Natl.*  
17 *Acad. Sci.* 201918628.
- 18 Liu, Z., Yang, C.-P., Sugino, K., Fu, C.-C., Liu, L.-Y., Yao, X., Lee, L.P., and Lee, T. (2015). Opposing  
19 intrinsic temporal gradients guide neural stem cell production of varied neuronal fates. *Science* (80-. ).  
20 350, 317–320.
- 21 Llorca, A., Ciceri, G., Beattie, R., Wong, F.K., Diana, G., Serafeimidou-Pouliou, E., Fernández-Otero,  
22 M., Streicher, C., Arnold, S.J., Meyer, M., et al. (2019). A stochastic framework of neurogenesis  
23 underlies the assembly of neocortical cytoarchitecture. *Elife* 8, 1–27.
- 24 Lodato, S., and Arlotta, P. (2015). Generating Neuronal Diversity in the Mammalian Cerebral Cortex.  
25 *Annu. Rev. Cell Dev. Biol.* 31, 699–720.
- 26 Marchetti, G., and Tavosanis, G. (2017). Steroid Hormone Ecdysone Signaling Specifies Mushroom



- 1 Body Neuron Sequential Fate via Chinmo. *Curr. Biol.* 27, 3017-3024.e4.
- 2 Marchetti, G., and Tavosanis, G. (2019). Modulators of hormonal response regulate temporal fate
- 3 specification in the *Drosophila* brain. *PLOS Genet.* 15, e1008491.
- 4 Mattar, P., Ericson, J., Blackshaw, S., and Cayouette, M. (2015). A Conserved Regulatory Logic Controls
- 5 Temporal Identity in Mouse Neural Progenitors. *Neuron* 85, 497–504.
- 6 McConnell, S.K. (1988). Fates of visual cortical neurons in the ferret after isochronic and heterochronic
- 7 transplantation. *J. Neurosci.* 8, 945–974.
- 8 McConnell, S.K., and Kaznowski, C.E. (1991). Cell cycle dependence of laminar determination in
- 9 developing neocortex. *Science* 254, 282–285.
- 10 Murthy, M., Fiete, I., and Laurent, G. (2008). Testing Odor Response Stereotypy in the *Drosophila*
- 11 Mushroom Body. *Neuron* 59, 1009–1023.
- 12 Oberst, P., Fièvre, S., Baumann, N., Concetti, C., Bartolini, G., and Jabaudon, D. (2019). Temporal
- 13 plasticity of apical progenitors in the developing mouse neocortex. *Nature* 573, 370–374.
- 14 Pahl, M.C., Doyle, S.E., and Siegrist, S.E. (2019). E93 Integrates Neuroblast Intrinsic State with
- 15 Developmental Time to Terminate MB Neurogenesis via Autophagy. *Curr. Biol.* 1–13.
- 16 Parthasarathy, S., Srivatsa, S., Nityanandam, A., and Tarabykin, V. (2014). Ntf3 acts downstream of Sip1
- 17 in cortical postmitotic neurons to control progenitor cell fate through feedback signaling. *Development*
- 18 141, 3324–3330.
- 19 Ren, Q., Yang, C.-P., Liu, Z., Sugino, K., Mok, K., He, Y., Ito, M., Nern, A., Otsuna, H., and Lee, T.
- 20 (2017). Stem Cell-Intrinsic, Seven-up-Triggered Temporal Factor Gradients Diversify Intermediate
- 21 Neural Progenitors. *Curr. Biol.* 1–11.
- 22 Rossi, A.M., Fernandes, V.M., and Desplan, C. (2017). Timing temporal transitions during brain
- 23 development. *Curr. Opin. Neurobiol.* 42, 84–92.
- 24 Seuntjens, E., Nityanandam, A., Miquelajauregui, A., Debruyne, J., Stryjewska, A., Goebbels, S., Nave,
- 25 K.A., Huylebroeck, D., and Tarabykin, V. (2009). Sip1 regulates sequential fate decisions by feedback
- 26 signaling from postmitotic neurons to progenitors. *Nat. Neurosci.* 12, 1373–1380.

1 Shen, Q., Wang, Y., Dimos, J.T., Fasano, C.A., Phoenix, T.N., Lemischka, I.R., Ivanova, N.B., Stifani,  
2 S., Morrisey, E.E., and Temple, S. (2006). The timing of cortical neurogenesis is encoded within lineages  
3 of individual progenitor cells. *Nat. Neurosci.* *9*, 743–751.

4 Shih, M.-F.M., Davis, F.P., Henry, G.L., and Dubnau, J. (2019). Nuclear Transcriptomes of the Seven  
5 Neuronal Cell Types That Constitute the *Drosophila* Mushroom Bodies. *G3 (Bethesda)*. *9*, 81–94.

6 Shu, P., Wu, C., Ruan, X., Liu, W., Hou, L., Fu, H., Wang, M., Liu, C., Zeng, Y., Chen, P., et al. (2019).  
7 Opposing Gradients of MicroRNA Expression Temporally Pattern Layer Formation in the Developing  
8 Neocortex. *Dev. Cell* *49*, 764-785.e4.

9 Siegrist, S.E., Haque, N.S., Chen, C.-H., Hay, B. a., and Hariharan, I.K. (2010). Inactivation of Both *foxo*  
10 and *reaper* Promotes Long-Term Adult Neurogenesis in *Drosophila*. *Curr. Biol.* *20*, 643–648.

11 Sipe, C.W., and Siegrist, S.E. (2017). *Eyeless* uncouples mushroom body neuroblast proliferation from  
12 dietary amino acids in *Drosophila*. *Elife* *6*, 1–10.

13 Sousa-Nunes, R., Cheng, L.Y., and Gould, A.P. (2010). Regulating neural proliferation in the *Drosophila*  
14 CNS. *Curr. Opin. Neurobiol.* *20*, 50–57.

15 Spana, E.P., and Doe, C.Q. (1996). *Numb* antagonizes Notch signaling to specify sibling neuron cell  
16 fates. *Neuron* *17*, 21–26.

17 Syed, M.H., Mark, B., and Doe, C.Q. (2017a). Steroid hormone induction of temporal gene expression in  
18 *Drosophila* brain neuroblasts generates neuronal and glial diversity. *Elife* *6*, 1–23.

19 Syed, M.H., Mark, B., and Doe, C.Q. (2017b). Playing Well with Others □: Extrinsic Cues Regulate  
20 Neural Progenitor Temporal Identity to Generate Neuronal Diversity. *Trends Genet.* *xx*, 1–10.

21 Telley, L., Govindan, S., Prados, J., Stevant, I., Nef, S., Dermitzakis, E., Dayer, A., and Jabaudon, D.  
22 (2016). Sequential transcriptional waves direct the differentiation of newborn neurons in the mouse  
23 neocortex. *Science (80-. )*. *351*, 1443–1446.

24 Telley, L., Agirman, G., Prados, J., Amberg, N., Fièvre, S., Oberst, P., Bartolini, G., Vitali, I., Cadilhac,  
25 C., Hippenmeyer, S., et al. (2019). Temporal patterning of apical progenitors and their daughter neurons  
26 in the developing neocortex. *Science (80-. )*. *364*, eaav2522.

- 1 Toma, K., Kumamoto, T., Hanashima, C., Toma, K., and Hanashima, C. (2014). The timing of upper-  
2 layer neurogenesis is conferred by sequential derepression and negative feedback from deep-layer  
3 neurons. *J. Neurosci.* *34*, 13259–13276.
- 4 Truman, J.W., Moats, W., Altman, J., Marin, E.C., and Williams, D.W. (2010). Role of Notch signaling  
5 in establishing the hemilineages of secondary neurons in *Drosophila melanogaster*. *Development* *137*, 53–  
6 61.
- 7 Turner, G.C., Bazhenov, M., and Laurent, G. (2008). Olfactory Representations by *Drosophila* Mushroom  
8 Body Neurons. *J. Neurophysiol.* *99*, 734–746.
- 9 Upadhyay, A., Moss-Taylor, L., Kim, M.-J., Ghosh, A.C., and O’Connor, M.B. (2017). TGF- $\beta$  Family  
10 Signaling in *Drosophila*. *Cold Spring Harb. Perspect. Biol.* *9*, a022152.
- 11 Urbach, R., and Technau, G.M. (2004). Neuroblast formation and patterning during early brain  
12 development in *Drosophila*. *Bioessays* *26*, 739–751.
- 13 Vosshall, L.B., and Stocker, R.F. (2007). Molecular Architecture of Smell and Taste in *Drosophila*. *Annu.*  
14 *Rev. Neurosci.* *30*, 505–533.
- 15 Wang, W., Jossin, Y., Chai, G., Lien, W.H., Tissir, F., and Goffinet, A.M. (2016). Feedback regulation of  
16 apical progenitor fate by immature neurons through Wnt7-Celsr3-Fzd3 signalling. *Nat. Commun.* *7*, 1–11.
- 17 Wong, D.C., Lovick, J.K., Ngo, K.T., Borisuthirattana, W., Omoto, J.J., and Hartenstein, V. (2013).  
18 Postembryonic lineages of the *Drosophila* brain: II. Identification of lineage projection patterns based on  
19 MARCM clones. *Dev. Biol.* *384*, 258–289.
- 20 Wu, Y.-C., Chen, C.-H., Mercer, A., and Sokol, N.S. (2012). let-7-Complex MicroRNAs Regulate the  
21 Temporal Identity of *Drosophila* Mushroom Body Neurons via chinmo. *Dev. Cell* *23*, 202–209.
- 22 Yamanaka, N., Rewitz, K.F., and O’Connor, M.B. (2013). Ecdysone Control of Developmental  
23 Transitions: Lessons from *Drosophila* Research. *Annu. Rev. Entomol.* *58*, 497–516.
- 24 Yang, C.-P., Fu, C.-C., Sugino, K., Liu, Z., Ren, Q., Liu, L.-Y., Yao, X., Lee, L.P., and Lee, T. (2015).  
25 Transcriptomes of lineage-specific *Drosophila* neuroblasts profiled via genetic targeting and robotic  
26 sorting. *Development*.

- 1 Yang, C.-P.P., Samuels, T.J., Huang, Y., Yang, L., Ish-Horowicz, D., Davis, I., and Lee, T. (2017). Imp  
2 and Syp RNA-binding proteins govern decommissioning of *Drosophila* neural stem cells. *Development*  
3 *144*, 3454–3464.
- 4 Yu, H.-H., Kao, C.-F., He, Y., Ding, P., Kao, J.-C., and Lee, T. (2010). A Complete Developmental  
5 Sequence of a *Drosophila* Neuronal Lineage as Revealed by Twin-Spot MARCM. *PLoS Biol.* *8*,  
6 e1000461.
- 7 Yu, H.H., Awasaki, T., Schroeder, M.D., Long, F., Yang, J.S., He, Y., Ding, P., Kao, J.C., Wu, G.Y.Y.,  
8 Peng, H., et al. (2013a). Clonal development and organization of the adult *Drosophila* central brain. *Curr.*  
9 *Biol.* *23*, 633–643.
- 10 Yu, X.M., Gutman, I., Mosca, T.J., Iram, T., Özkan, E., Garcia, K.C., Luo, L., and Schuldiner, O.  
11 (2013b). Plum, an immunoglobulin superfamily protein, regulates axon pruning by facilitating TGF- $\beta$   
12 signaling. *Neuron* *78*, 456–468.
- 13 Zahr, S.K., Yang, G., Kazan, H., Borrett, M.J., Yuzwa, S.A., Voronova, A., Kaplan, D.R., and Miller,  
14 F.D. (2018). A Translational Repression Complex in Developing Mammalian Neural Stem Cells that  
15 Regulates Neuronal Specification. *Neuron* *97*, 520-537.e6.
- 16 Zheng, X., Wang, J., Haerry, T.E., Wu, A.Y.-H., Martin, J., O'Connor, M.B., Lee, C.-H.J., and Lee, T.  
17 (2003). TGF-beta signaling activates steroid hormone receptor expression during neuronal remodeling in  
18 the *Drosophila* brain. *Cell* *112*, 303–315.
- 19 Zhu, S., Lin, S., Kao, C.-F., Awasaki, T., Chiang, A.-S., and Lee, T. (2006). Gradients of the *Drosophila*  
20 Chinmo BTB-Zinc Finger Protein Govern Neuronal Temporal Identity. *Cell* *127*, 409–422.
- 21

### A Post-embryonic development (~9 days)

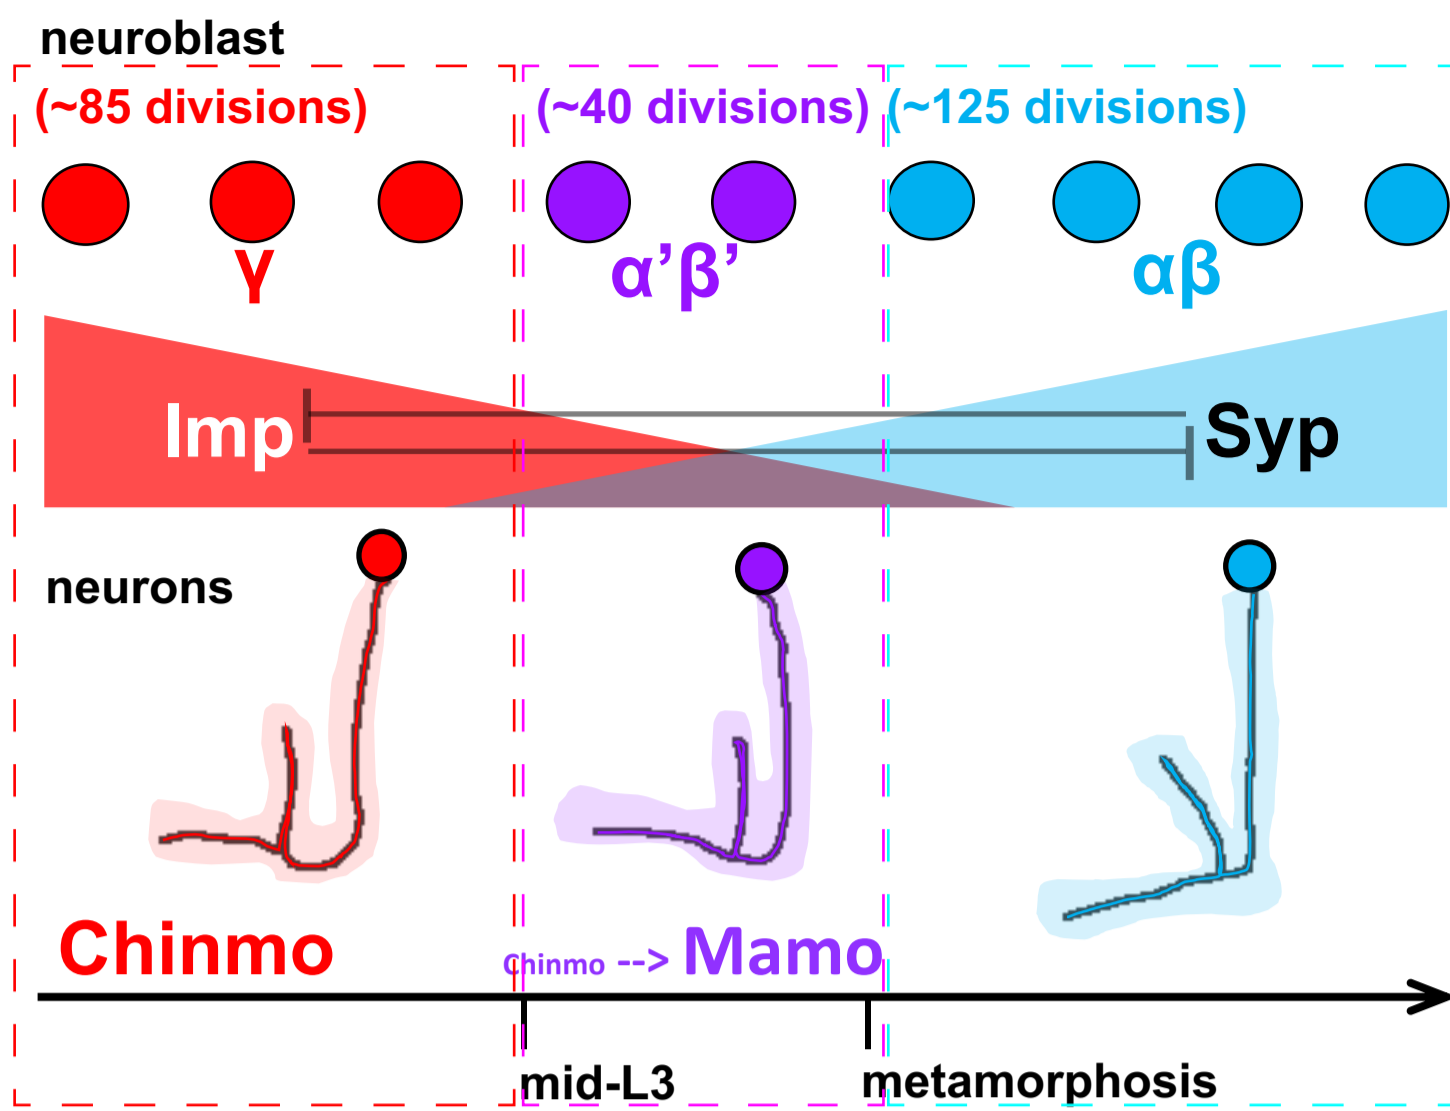

### B Adult

|                    | $\gamma$ | $\alpha'\beta'$ | $\alpha\beta$ |
|--------------------|----------|-----------------|---------------|
| Trio               | +        | ++              |               |
| Mamo               | +        | ++              |               |
| FasII (axons only) | +        |                 | ++            |

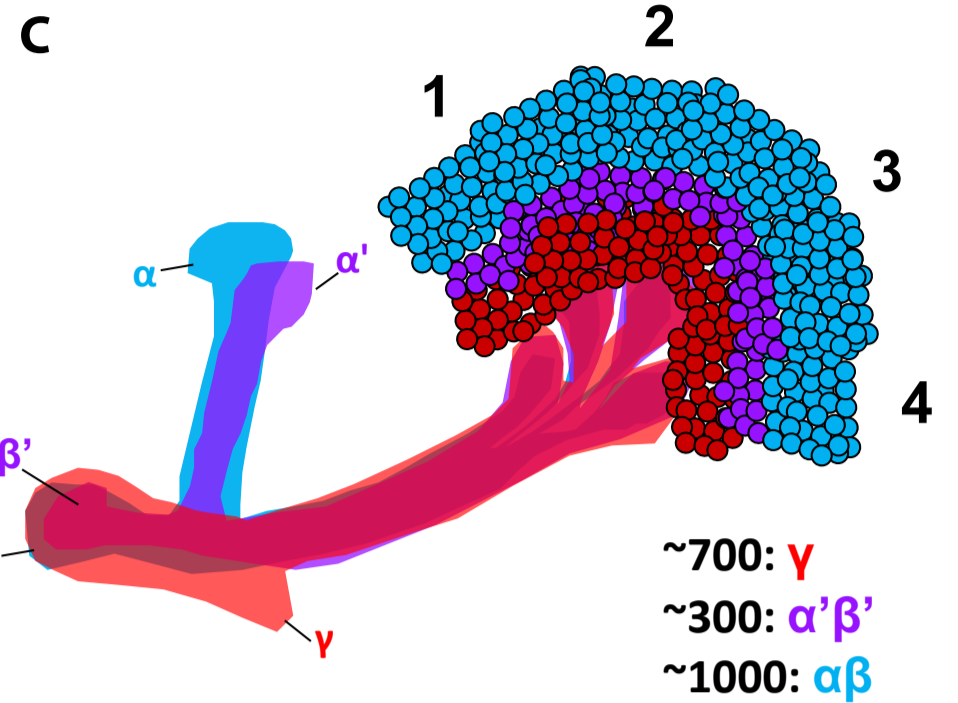

### Adult: *mb-Gal4* MARCM neuroblast clones induced at L1

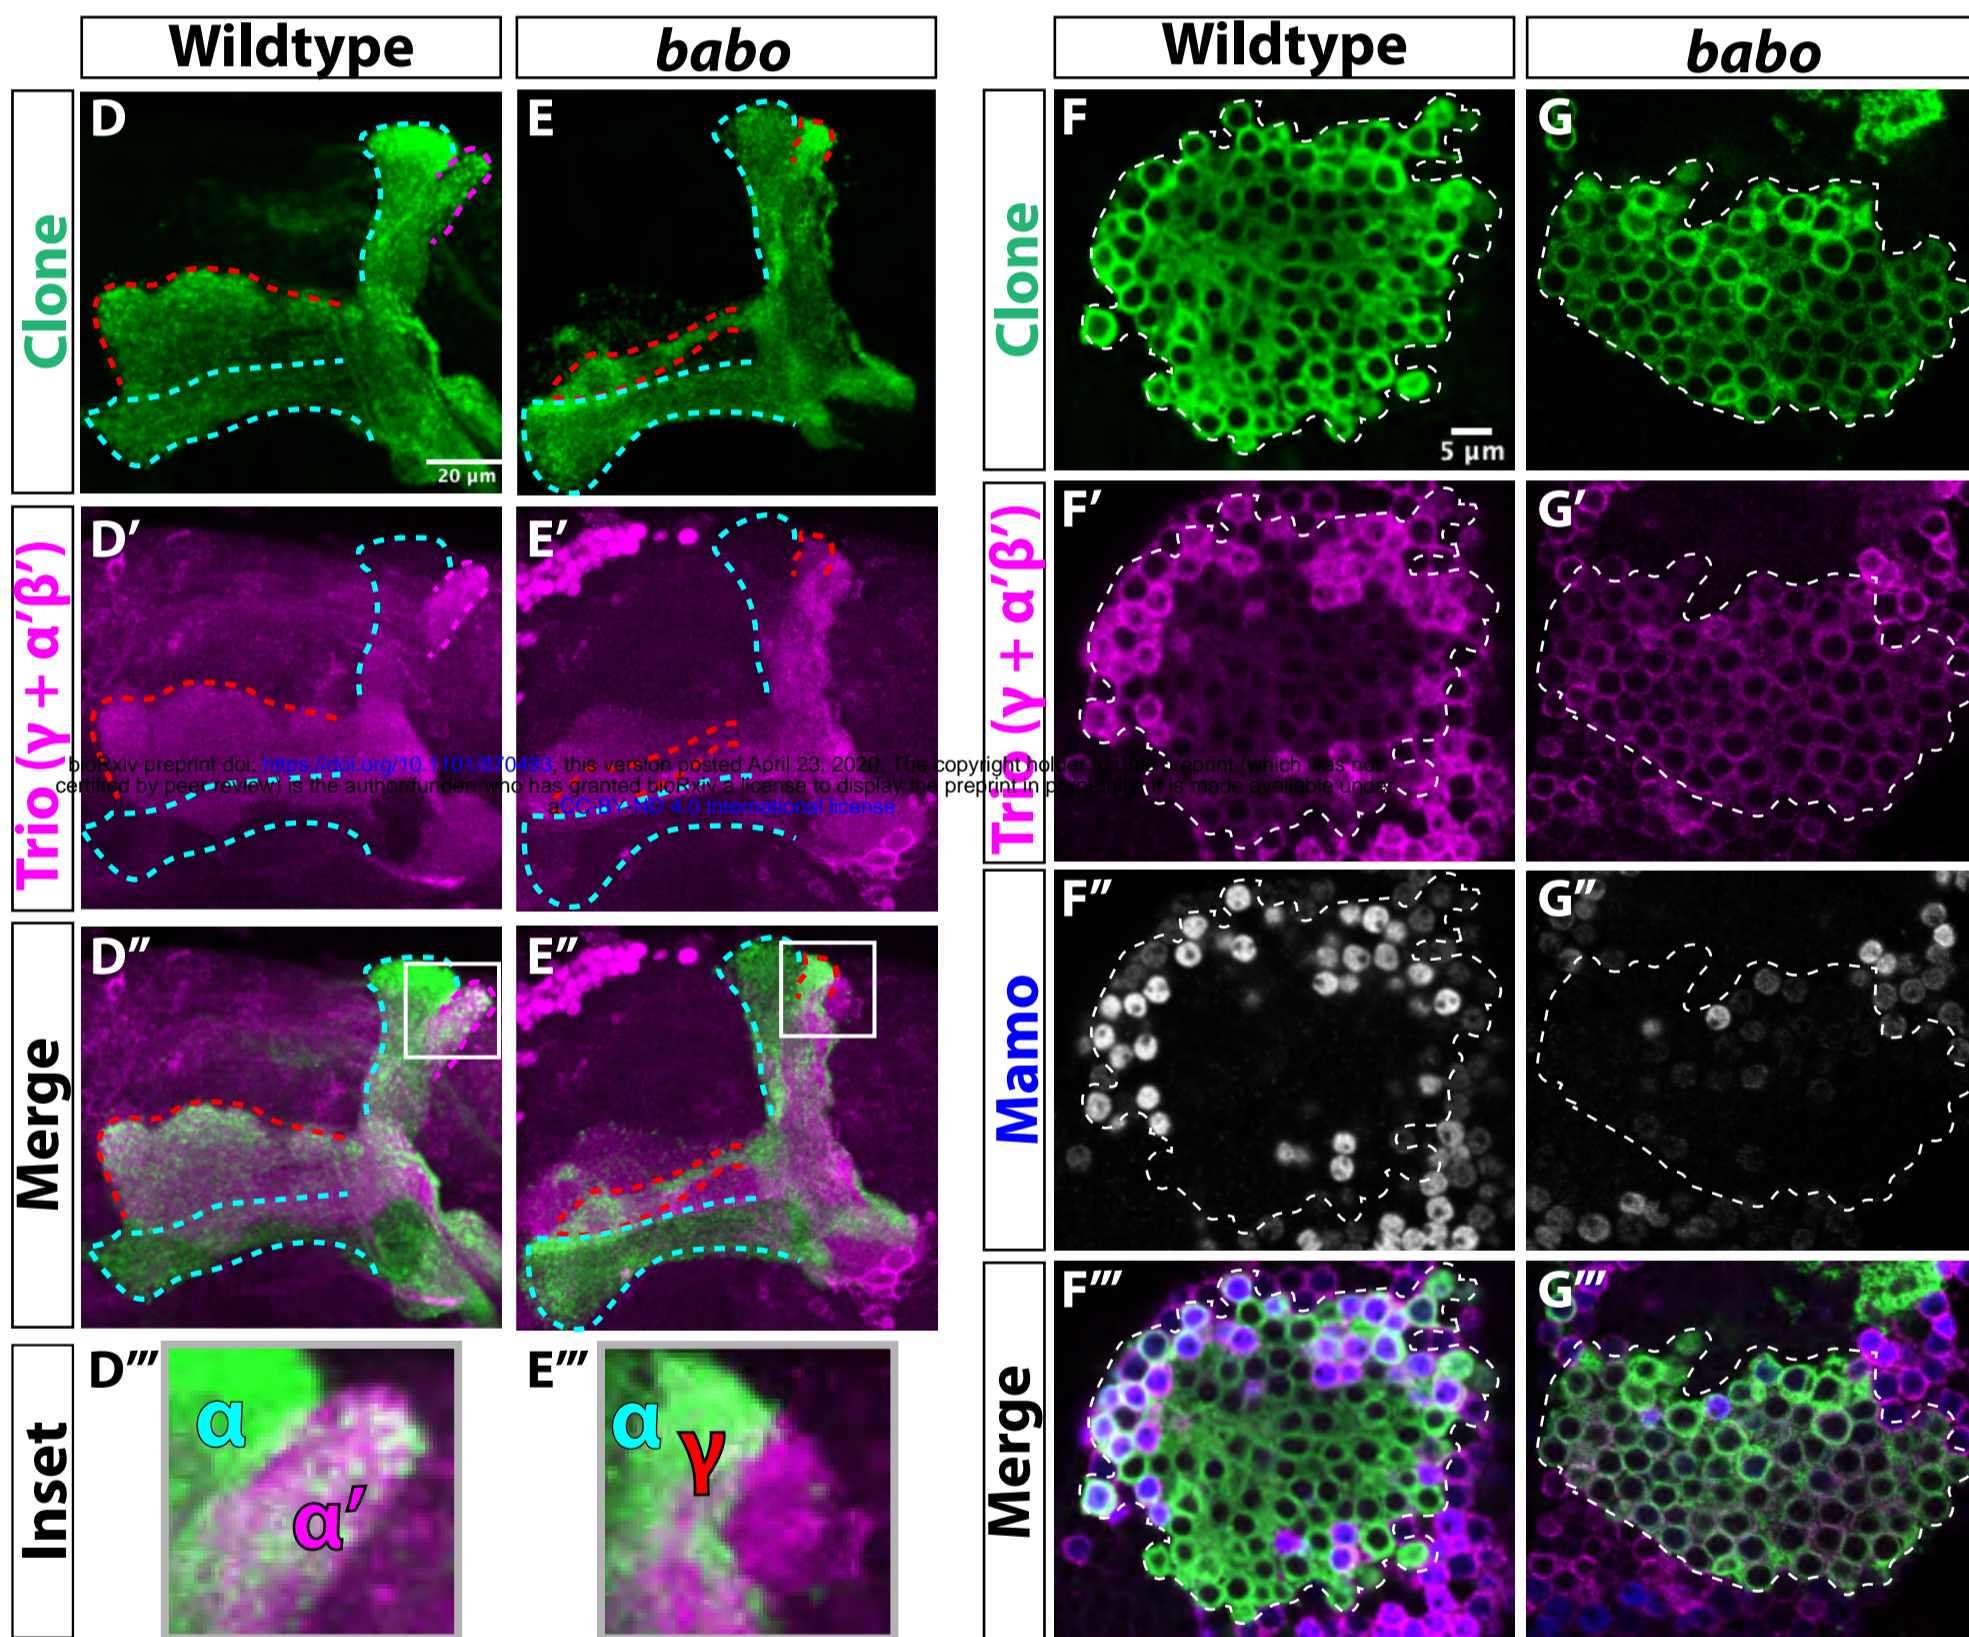

### H *mb-Gal4* MARCM

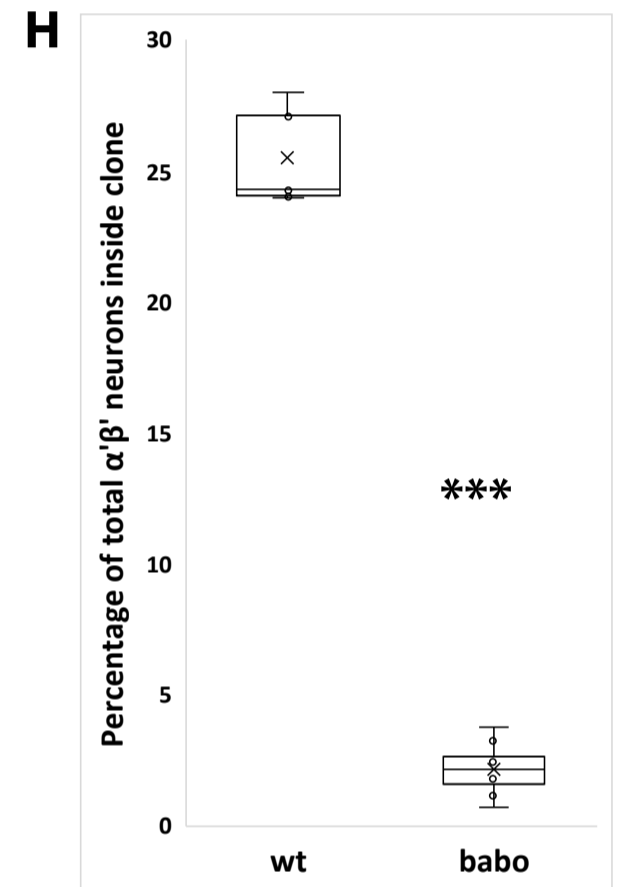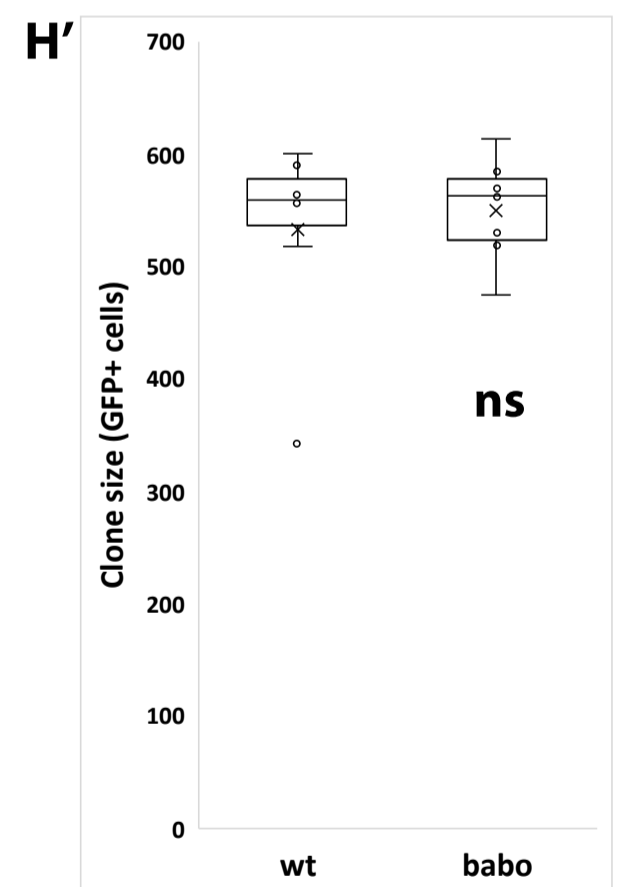

### Adult axonal morphology: $\gamma$ , $\alpha'\beta'$ , $\alpha\beta$

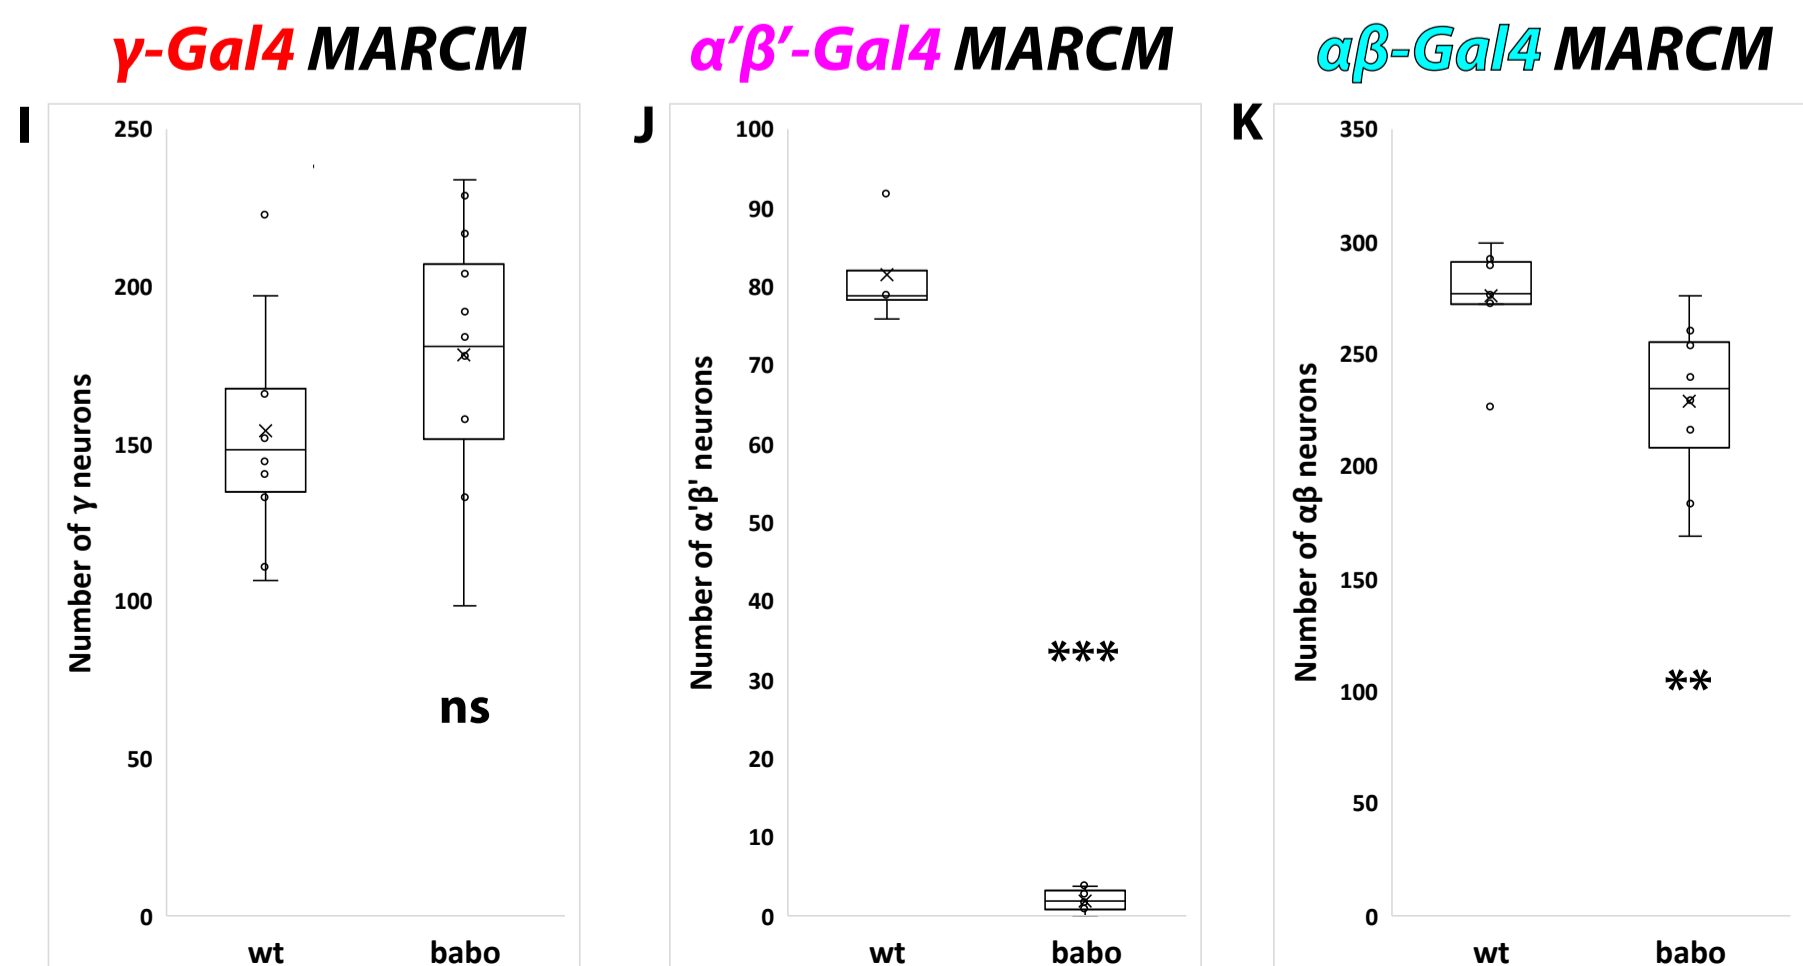

# Wandering L3: *mb-Gal4* MARCM neuroblast clones induced at L1

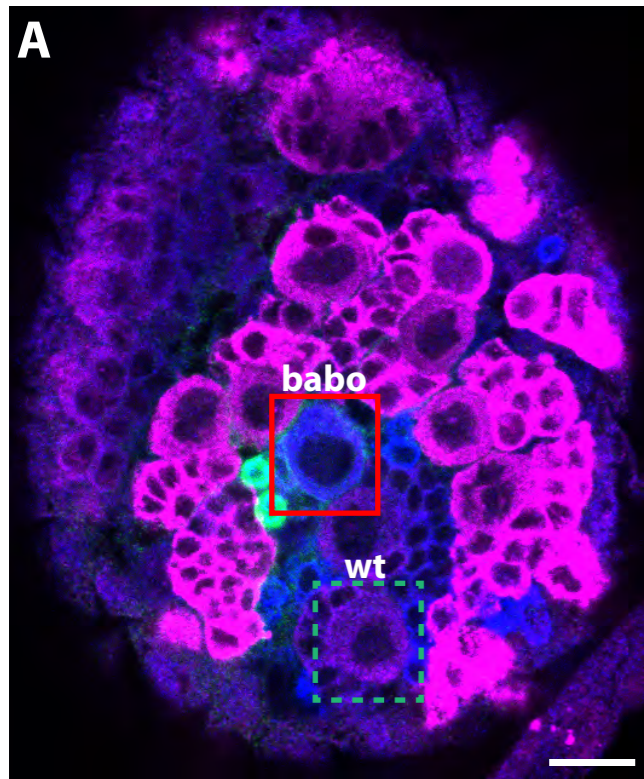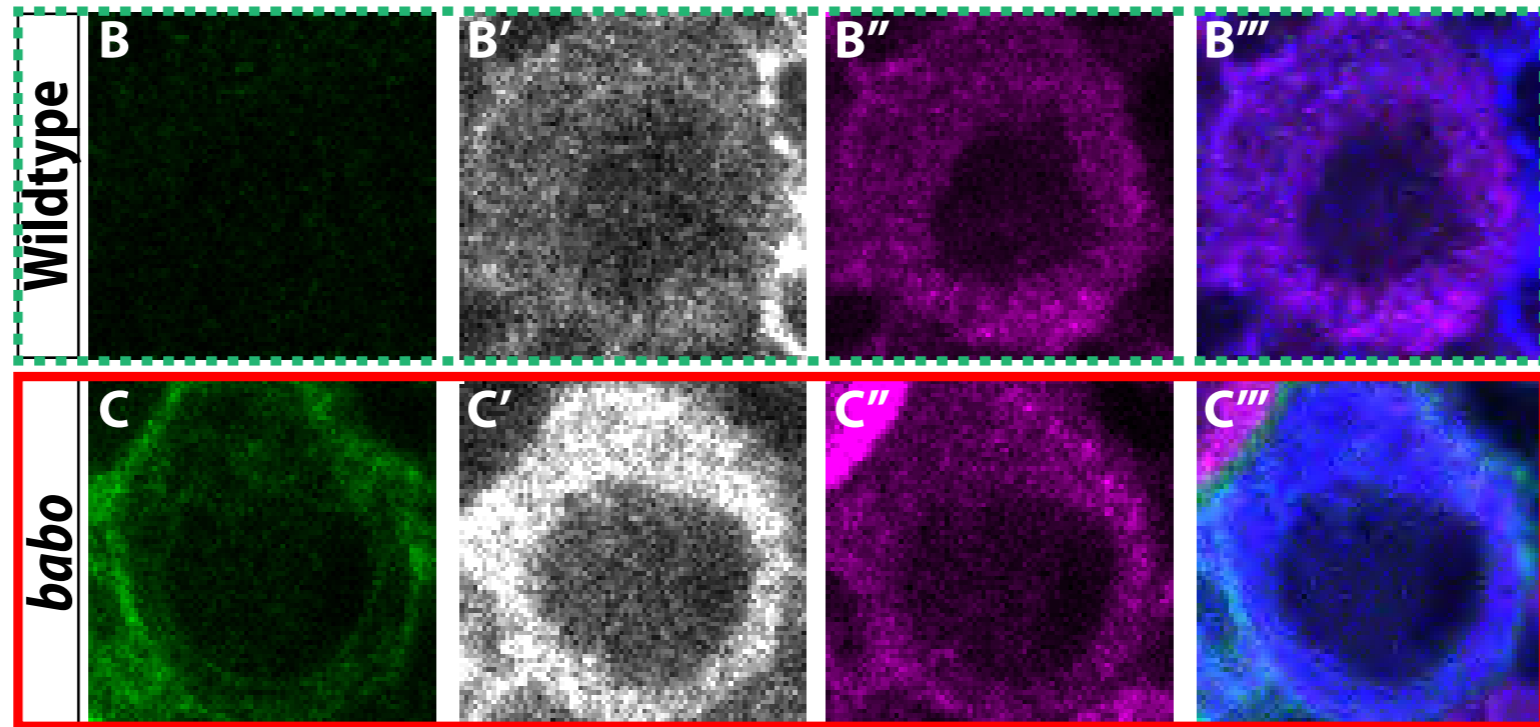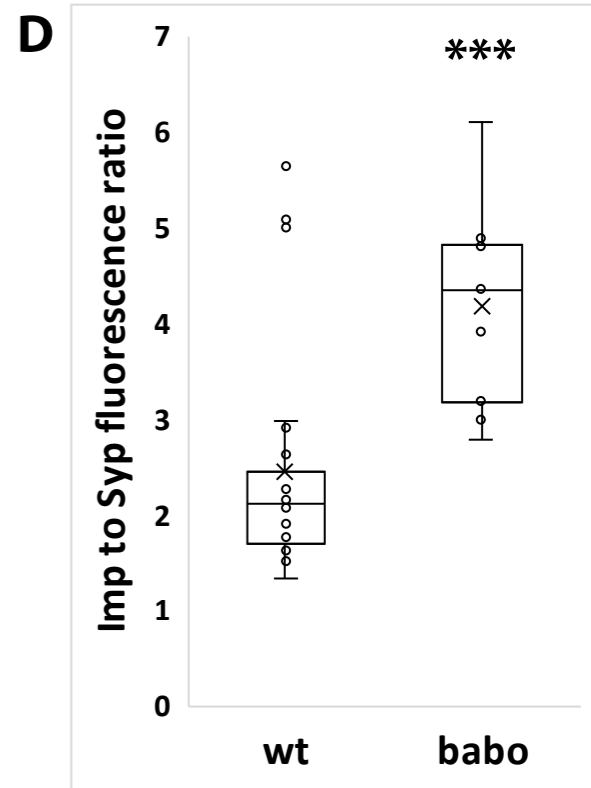

## Adult: *mb-Gal4* MARCM neuroblast clones induced at L1

**UAS-babo-Act**

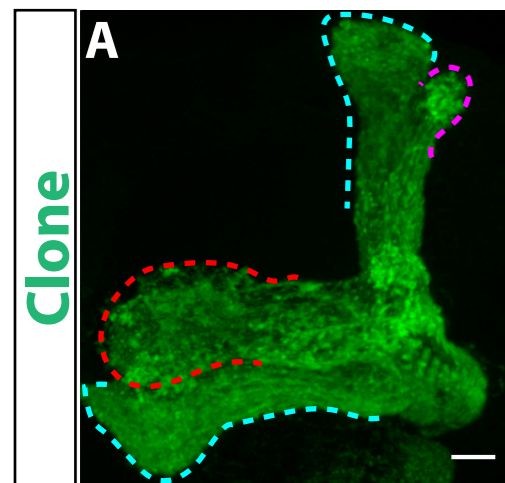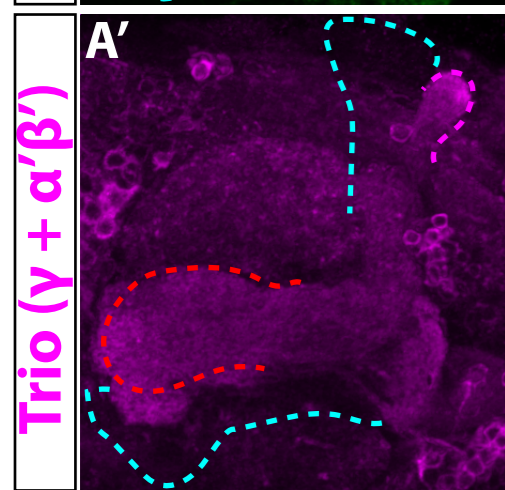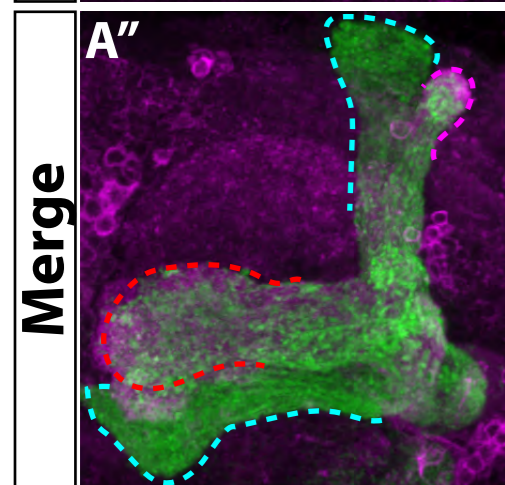

**B**

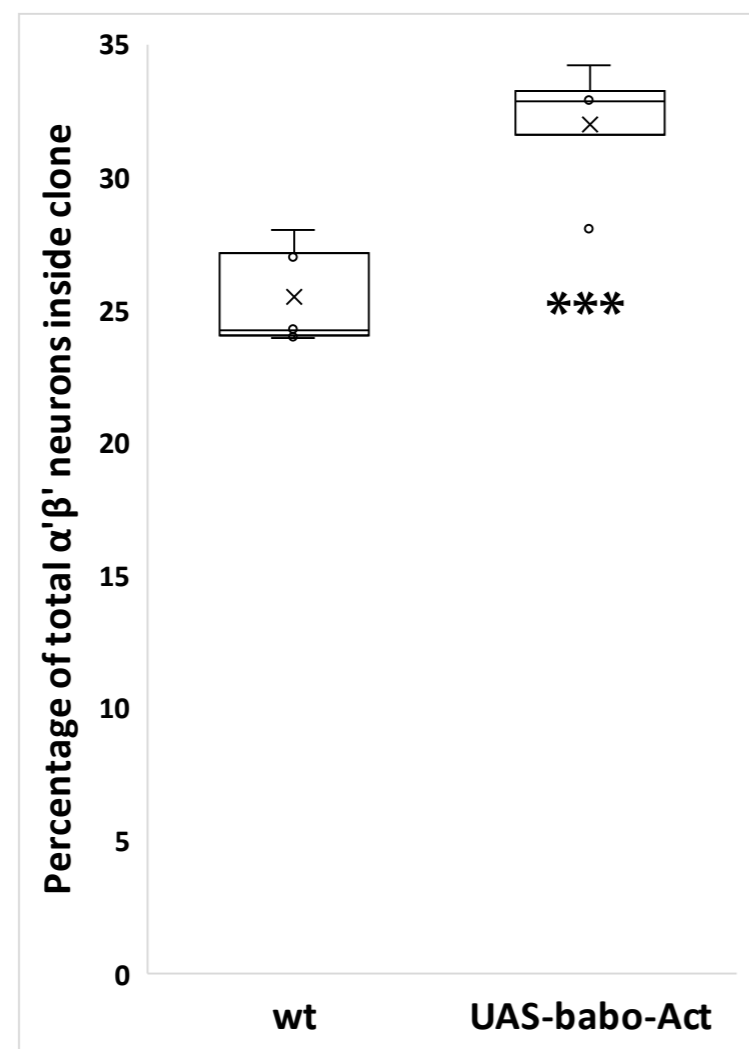

## Wandering L3: *mb-Gal4* MARCM neuroblast clone induced at L1

**C**

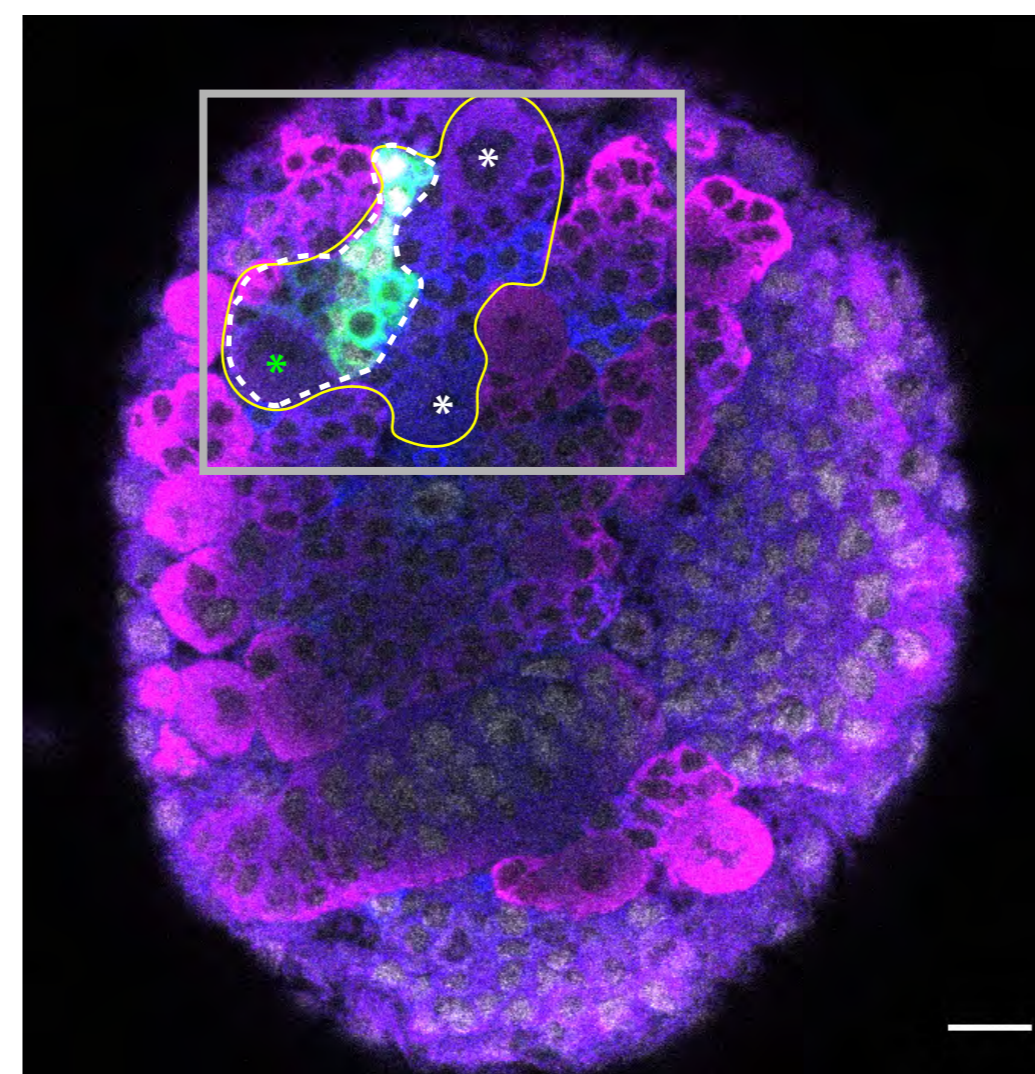

**UAS-babo-Act**

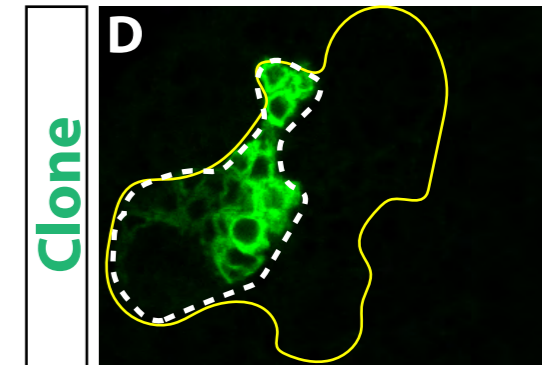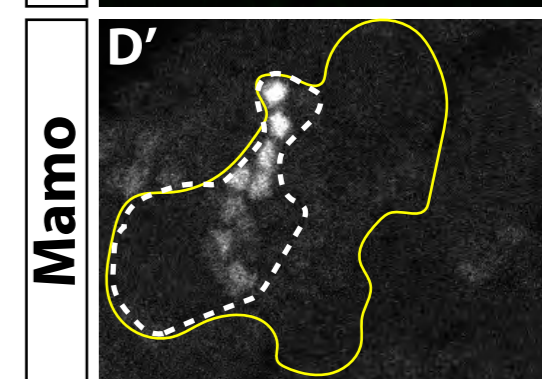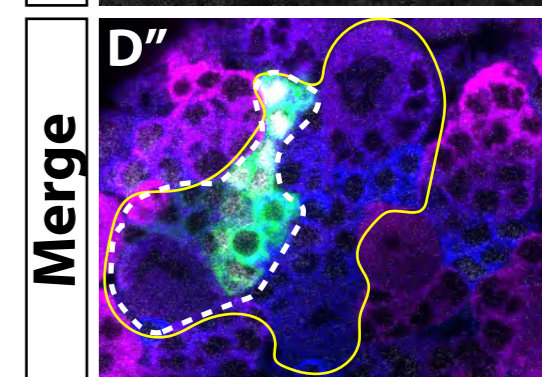

## Adult axon region: *repo-Gal4*

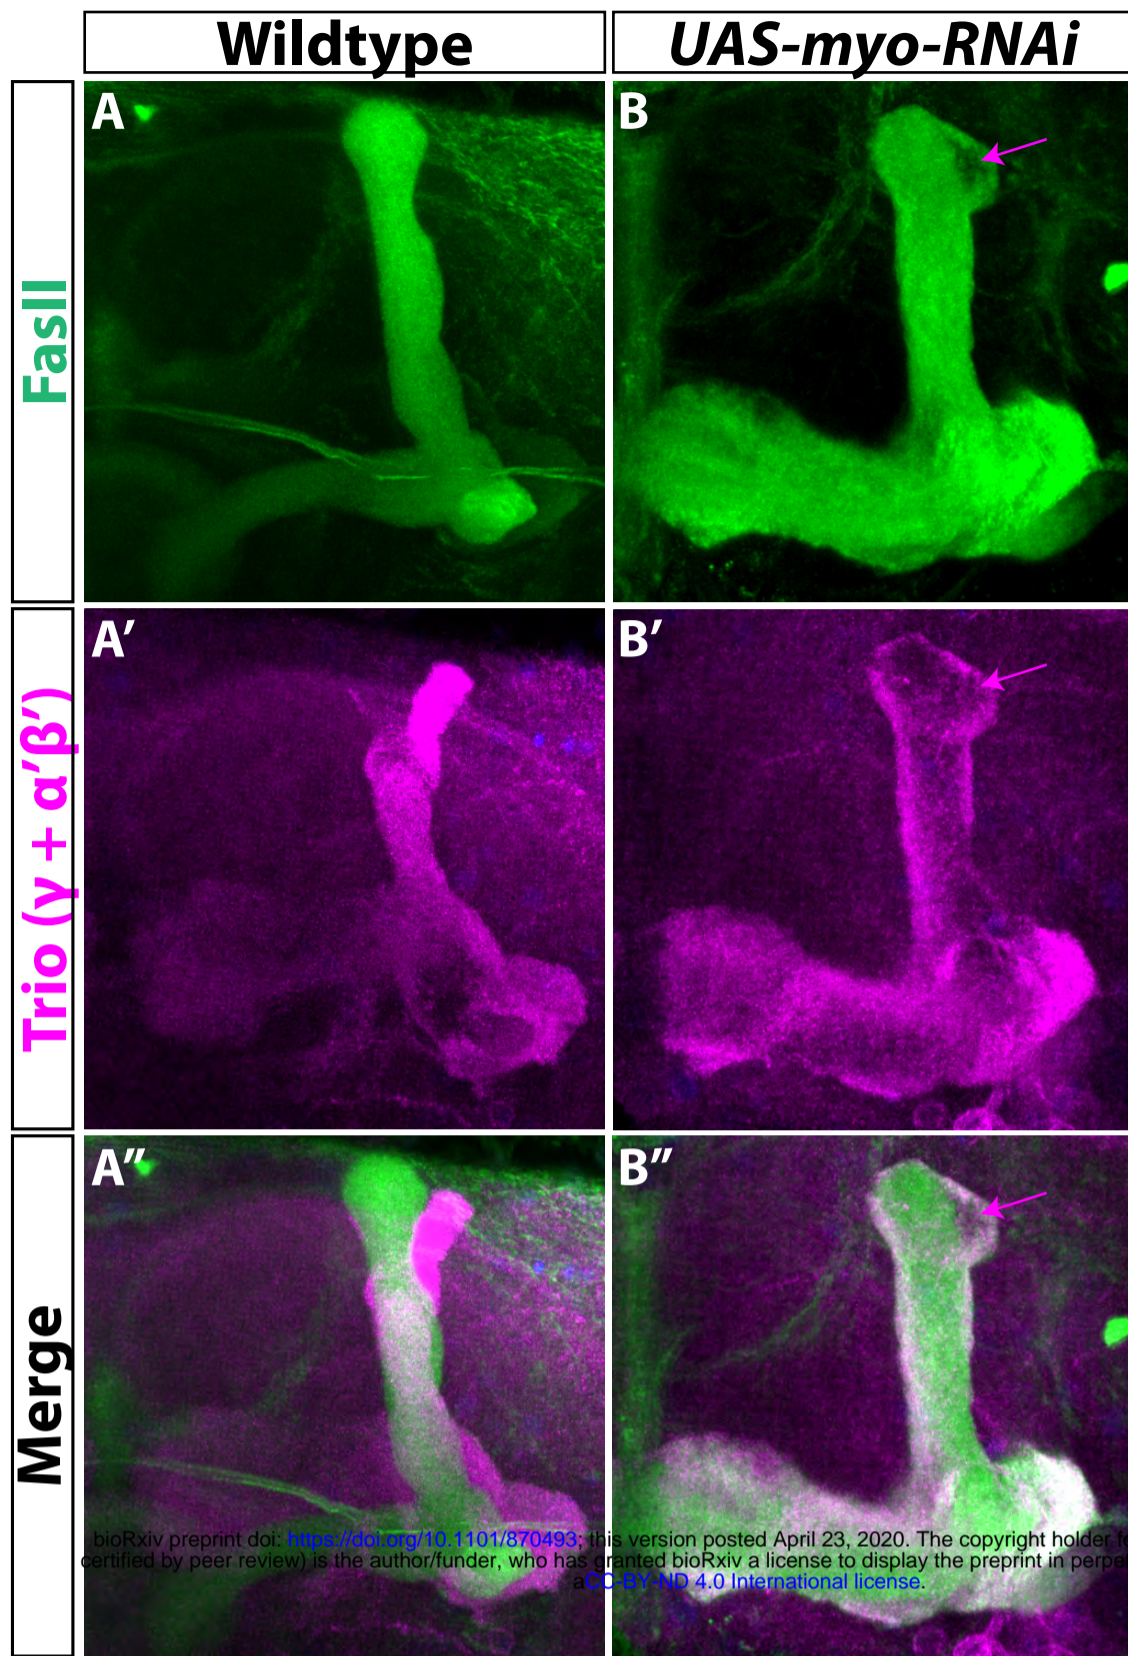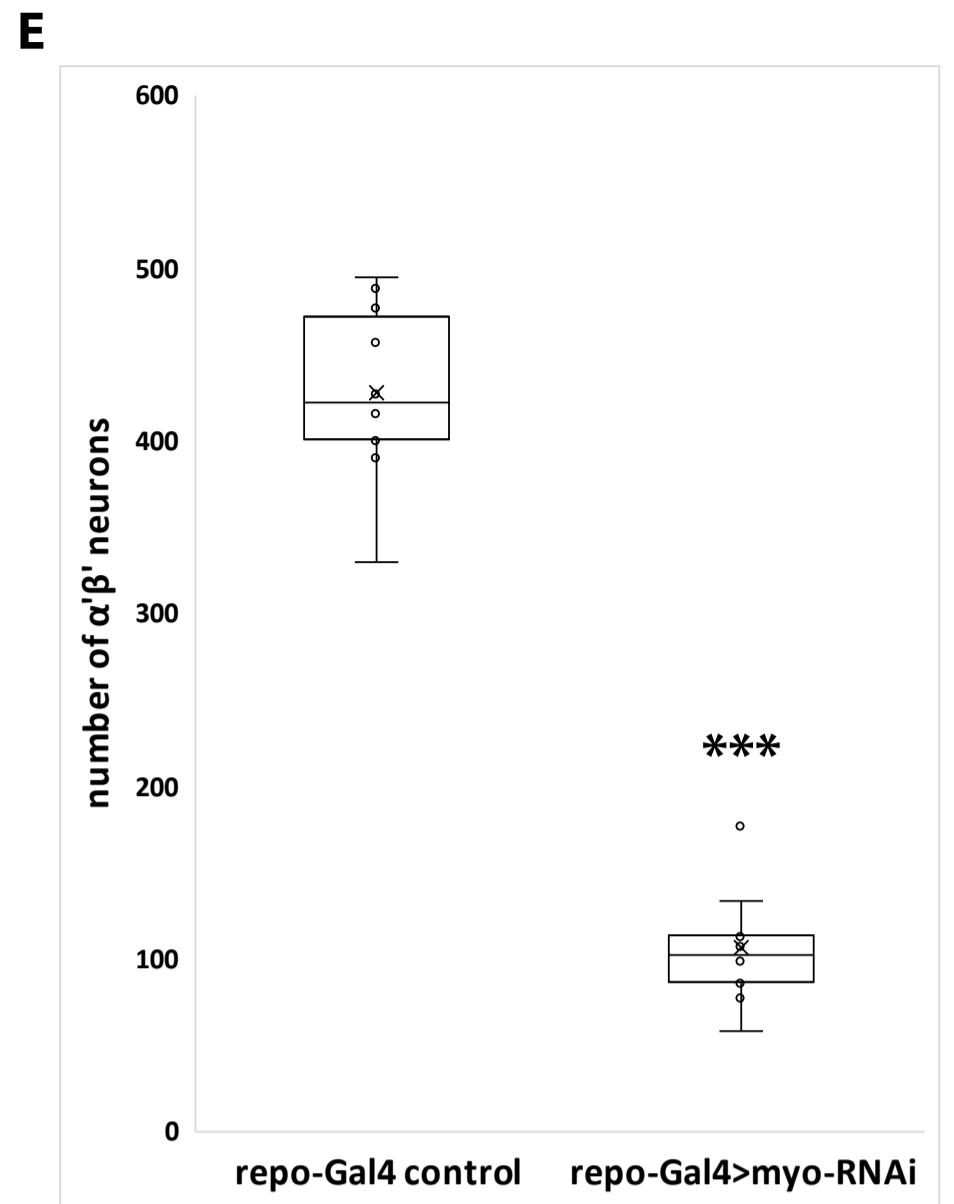

## Wandering L3: *repo-Gal4*

### Adult axonal morphology: $\gamma$ , $\alpha'\beta'$ , $\alpha\beta$

### Adult cell body region: *repo-Gal4*

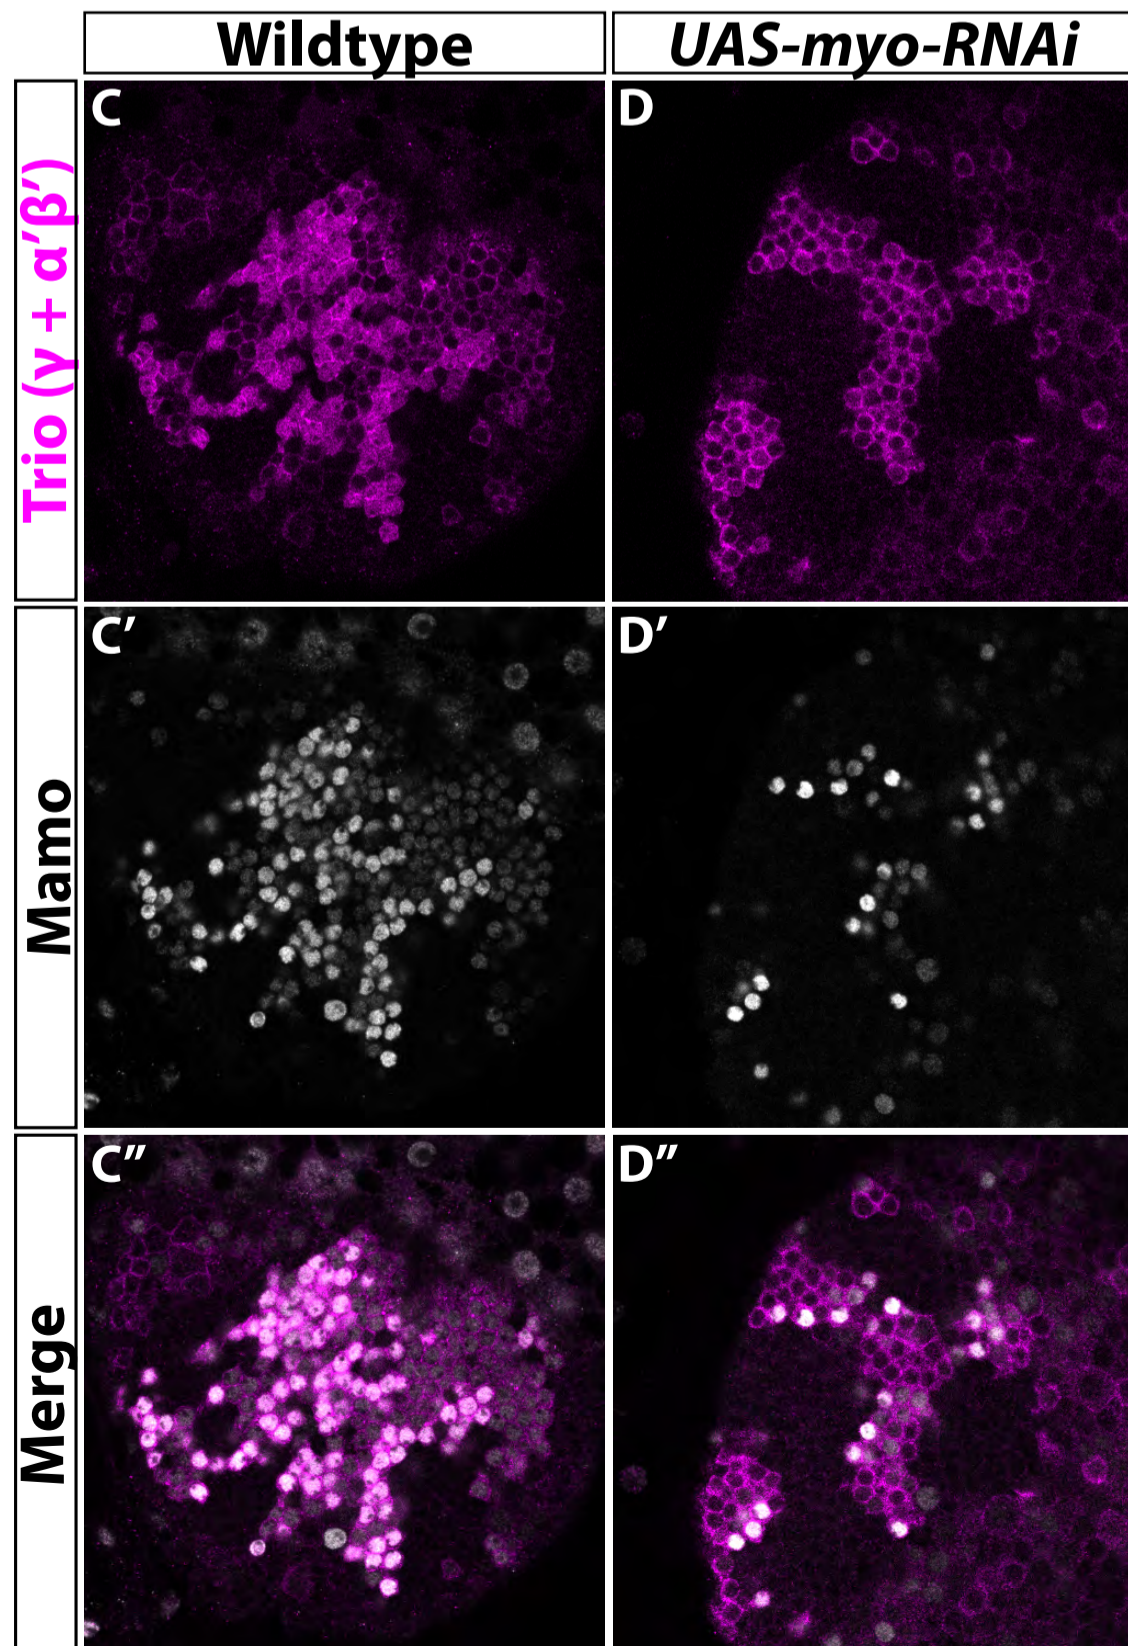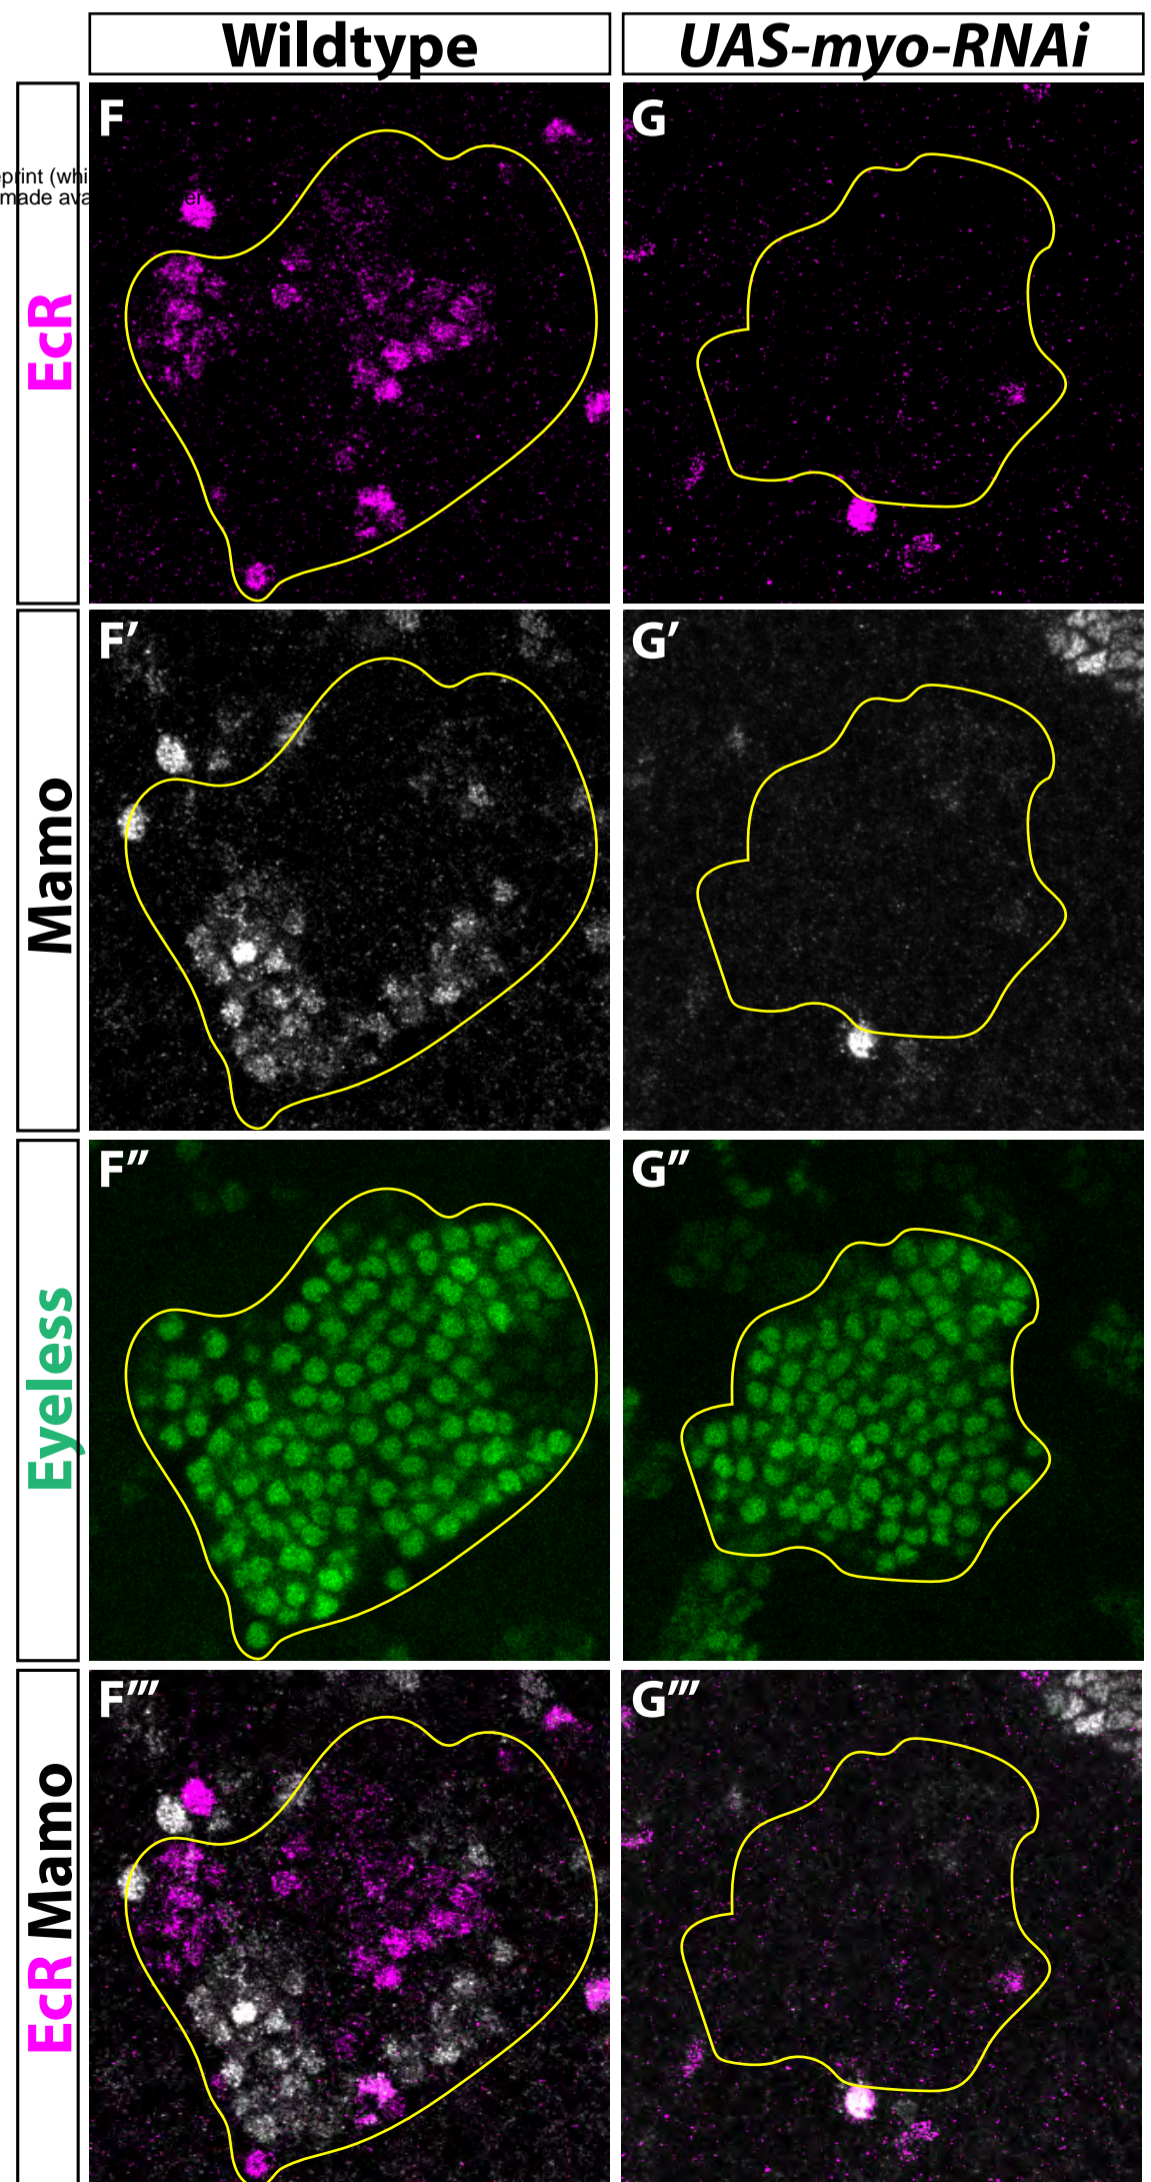

bioRxiv preprint doi: <https://doi.org/10.1101/870493>; this version posted April 23, 2020. The copyright holder for this preprint (which was not certified by peer review) is the author/funder, who has granted bioRxiv a license to display the preprint in perpetuity. It is made available under aCC-BY-ND 4.0 International license.



# Wandering L3: *mb-Gal4*

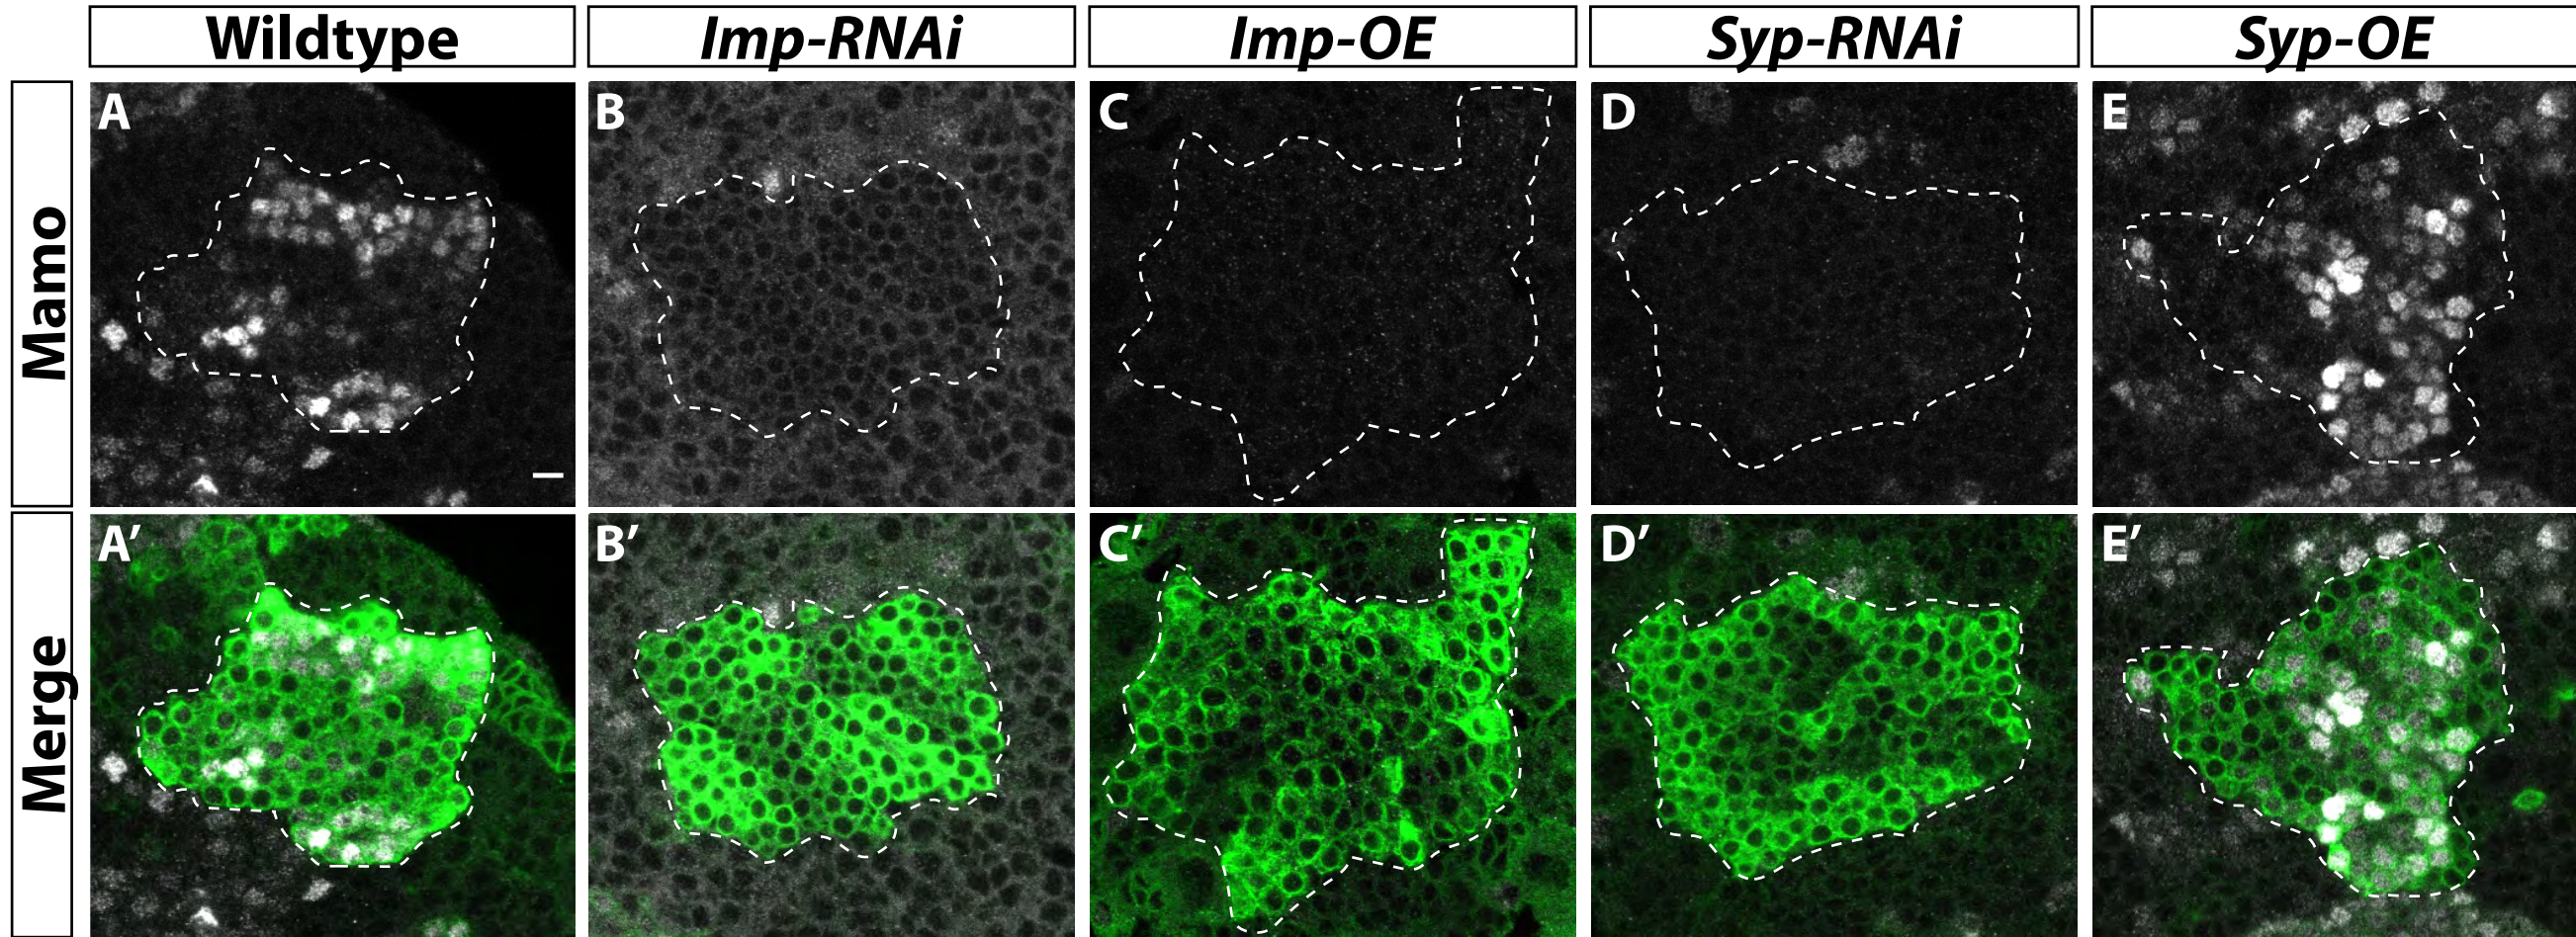

**Adult: *mb-Gal4* MARCM neuroblast clones induced at L1**

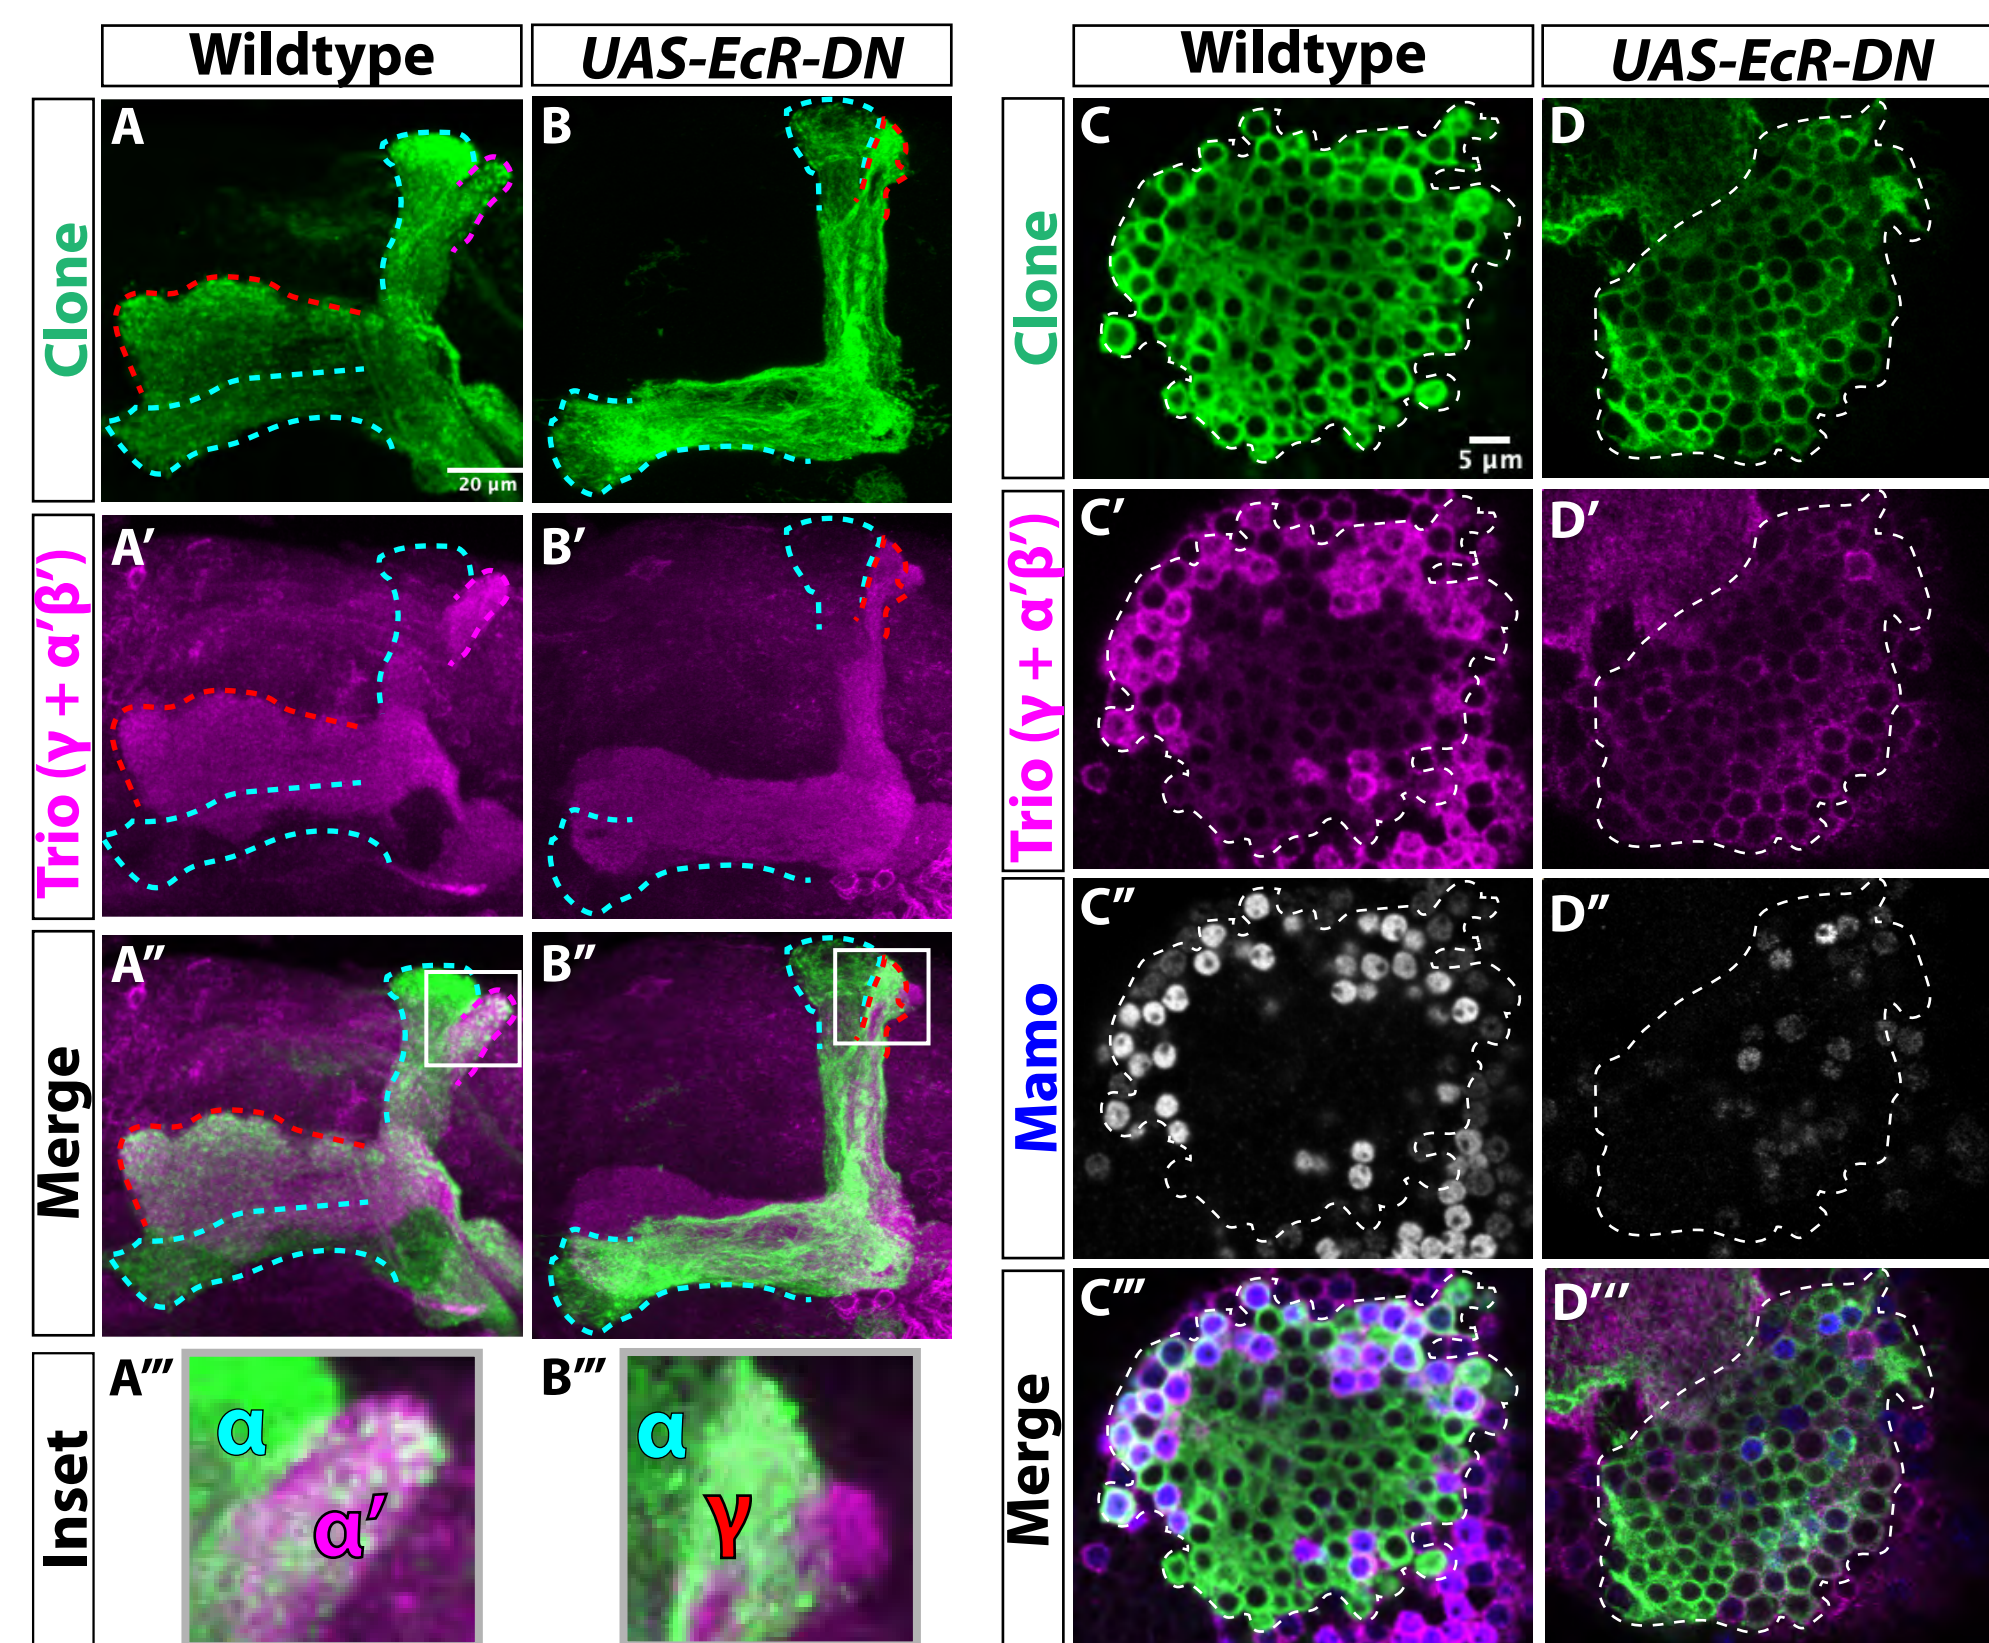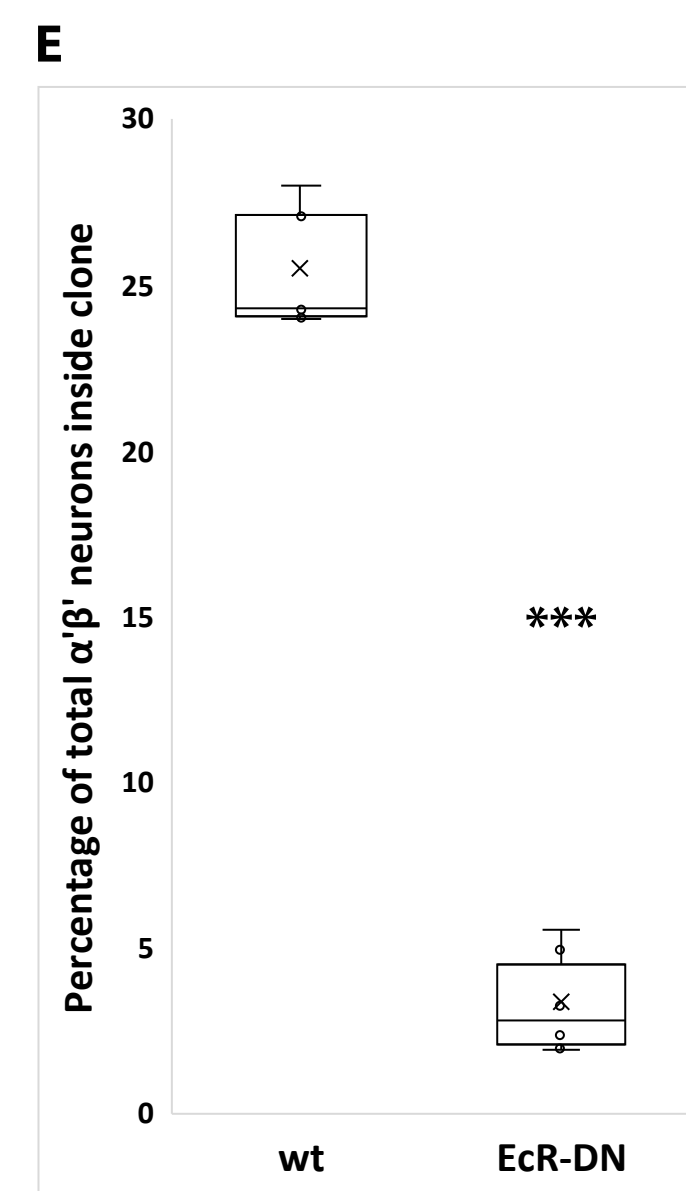

**Wandering L3: *mb-Gal4* MARCM neuroblast clones induced at L1**

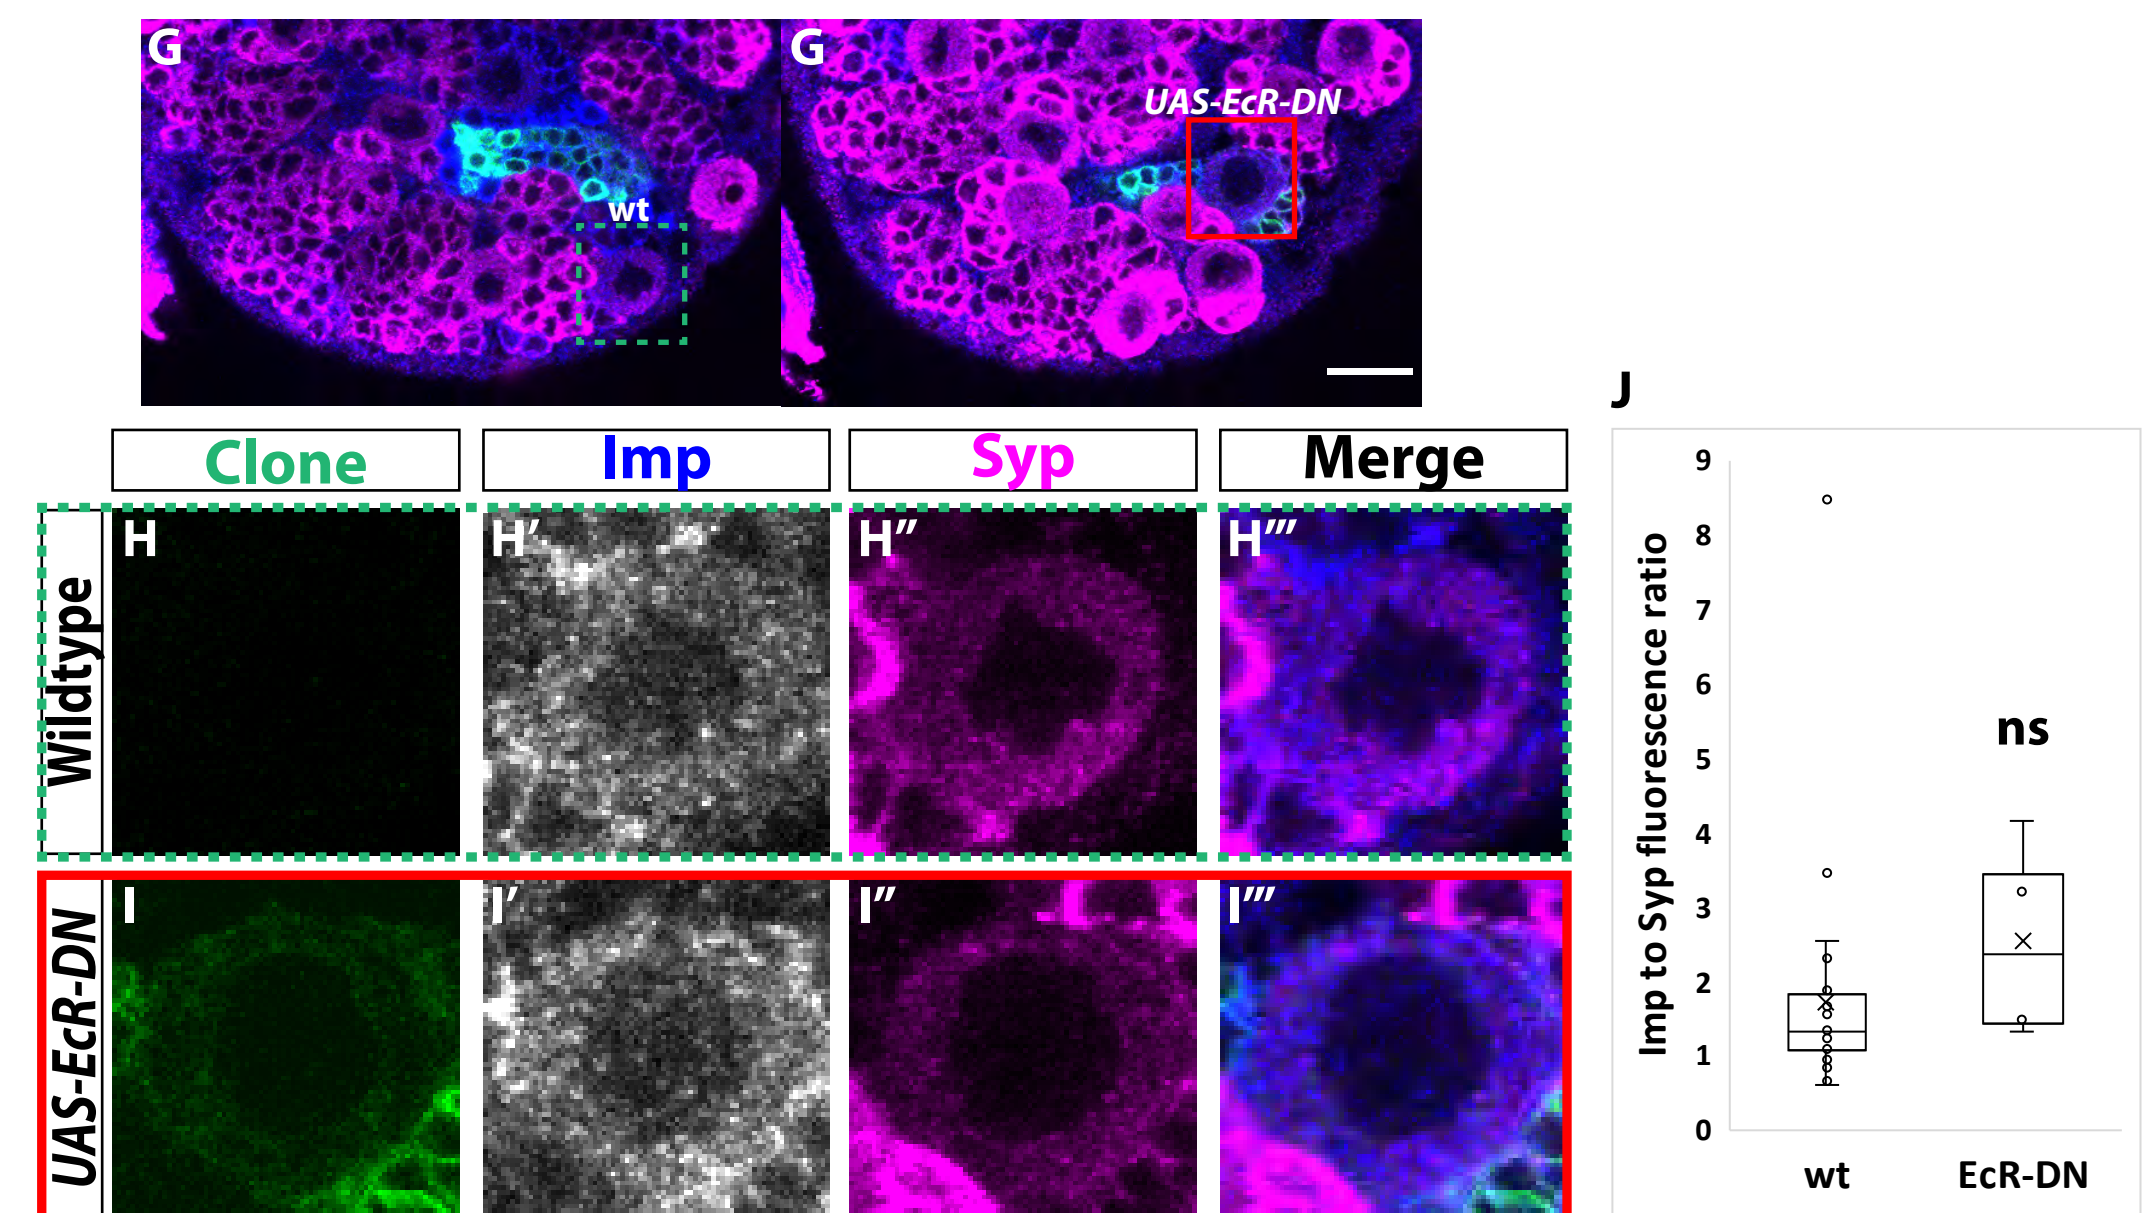

Adult axonal morphology:  $\gamma$ ,  $\alpha'\beta'$ ,  $\alpha\beta$

**Adult: MARCM neuroblast clones induced at L1**

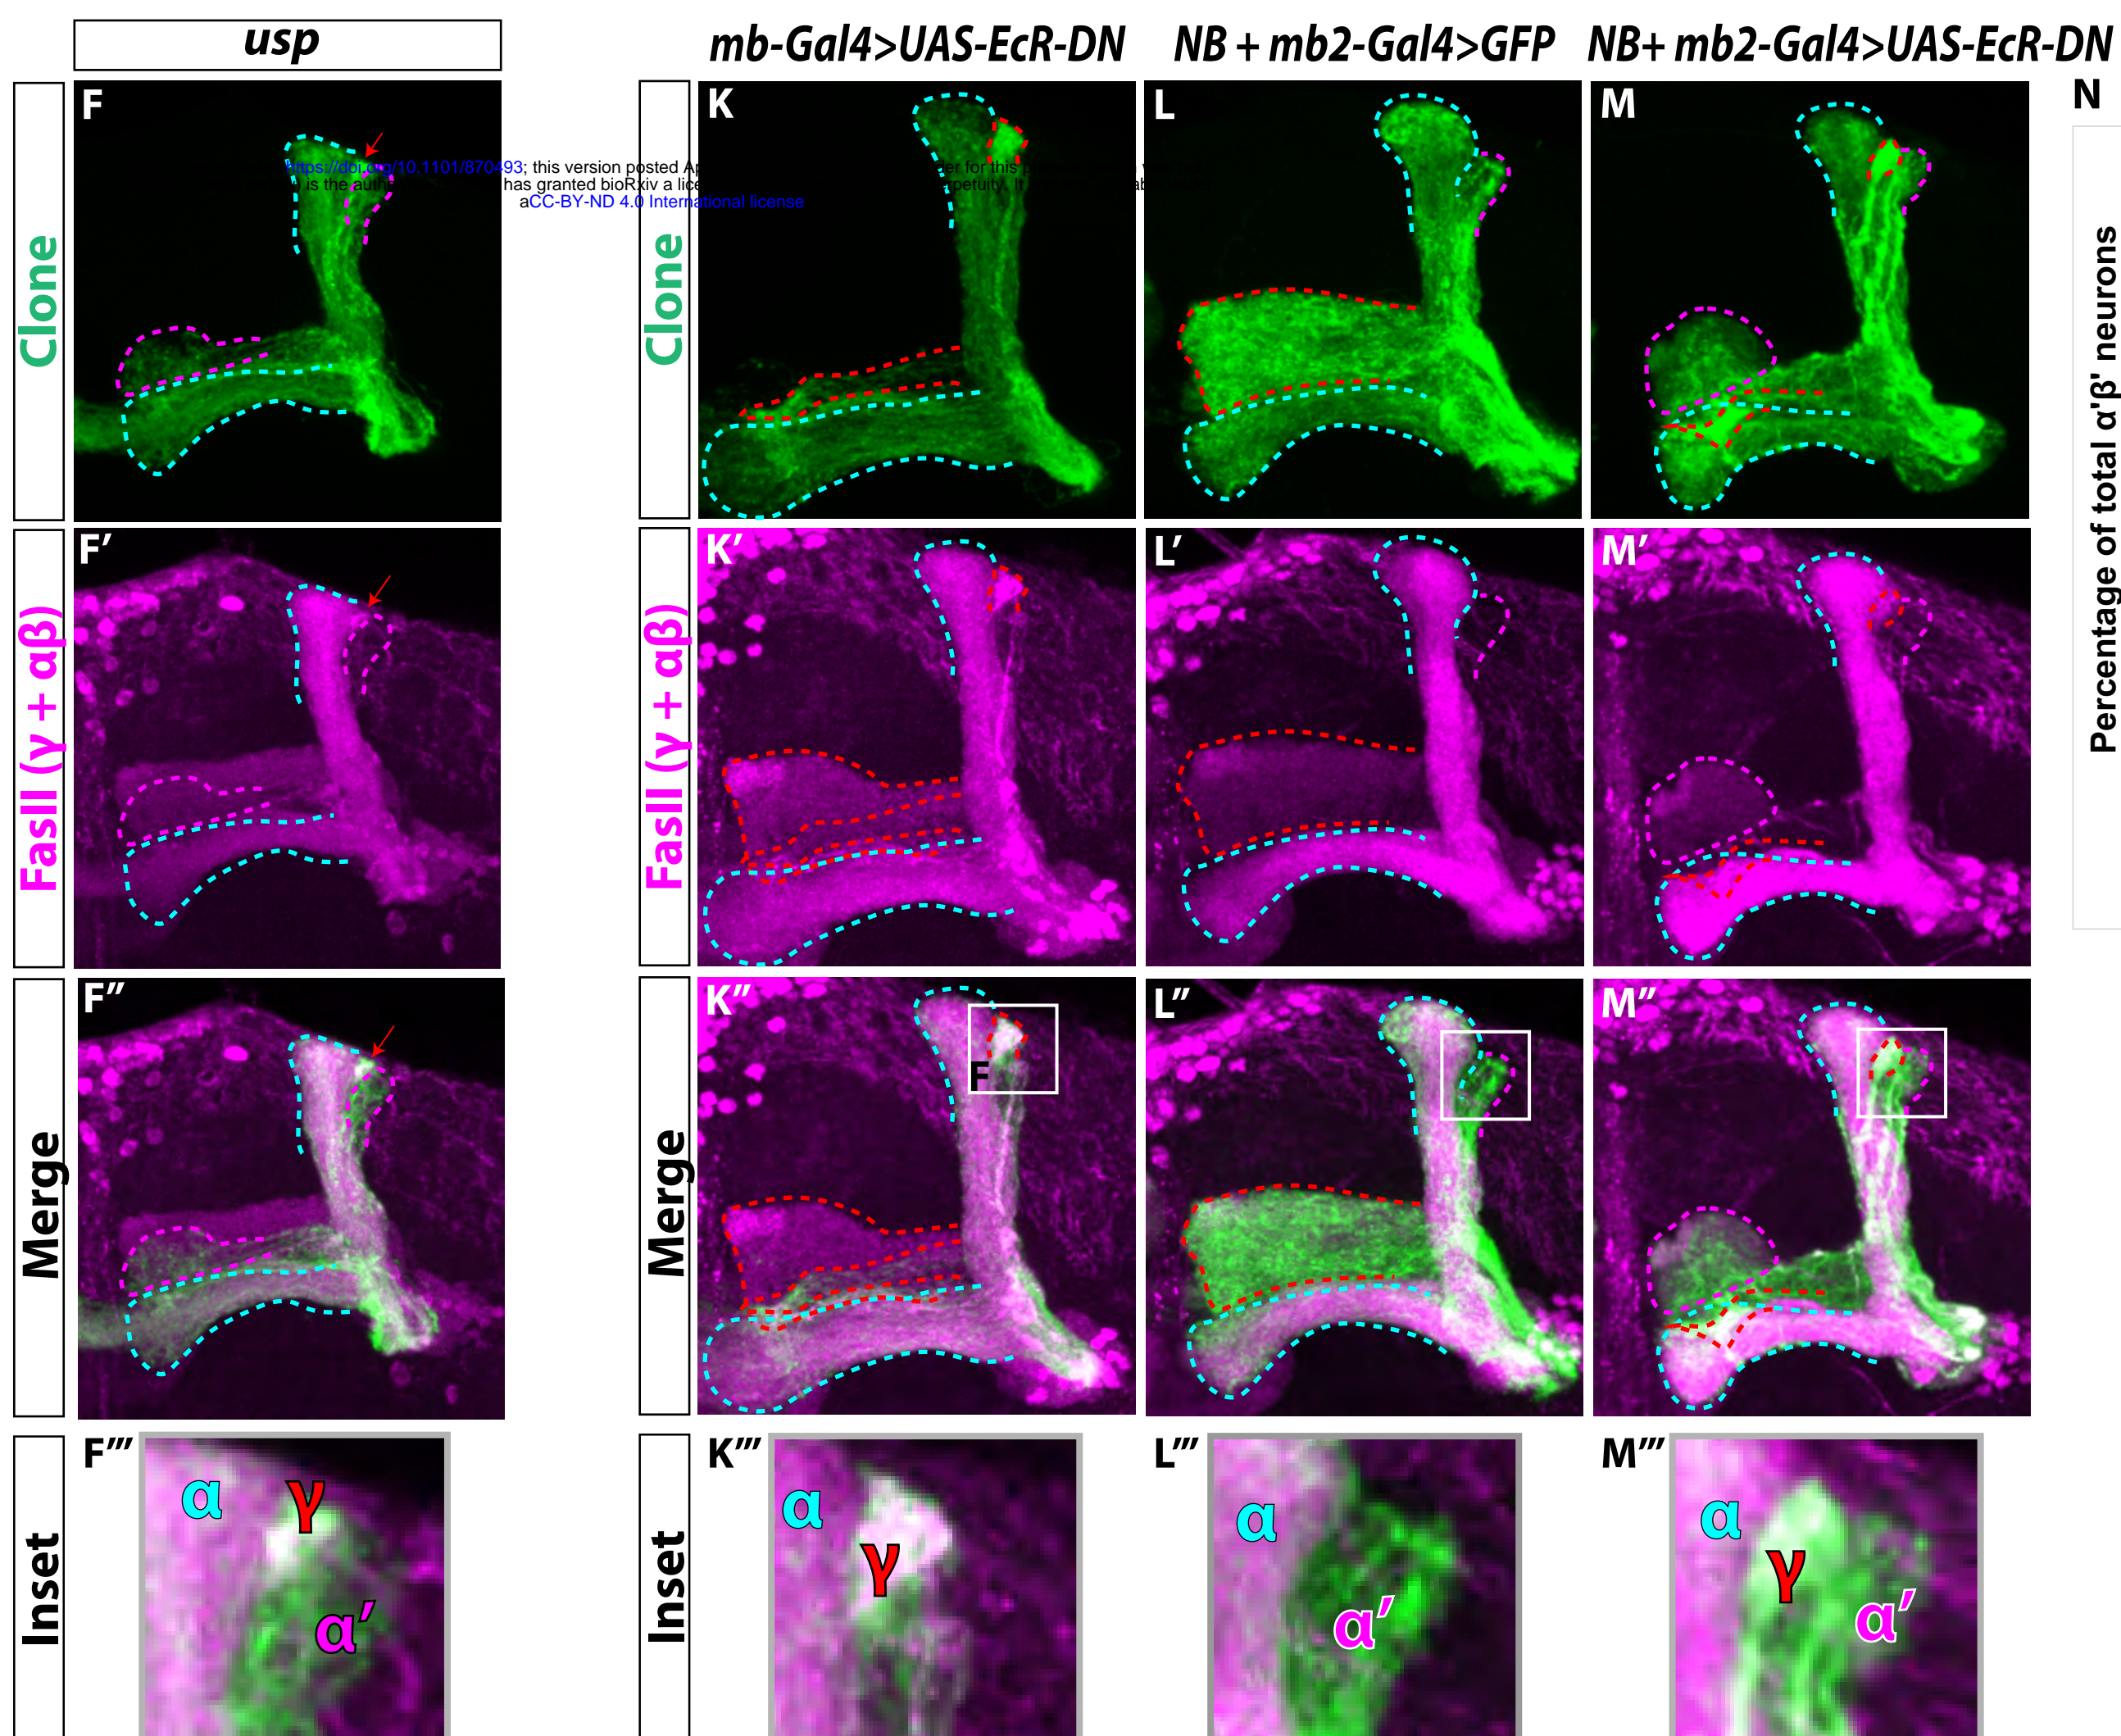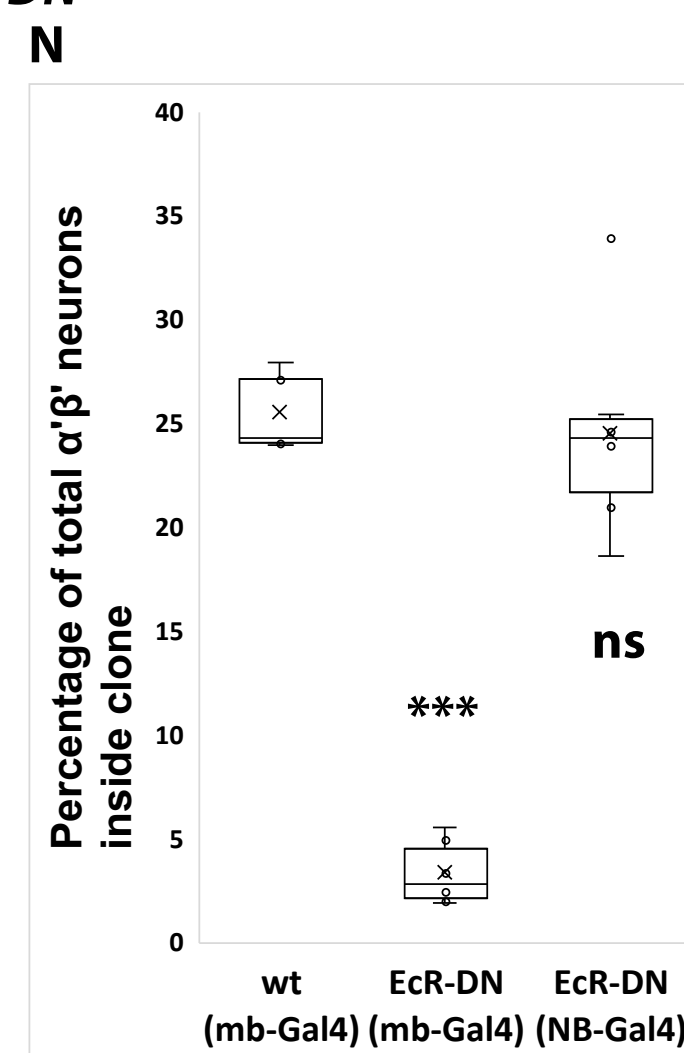

**Wandering L3: *mb-Gal4***

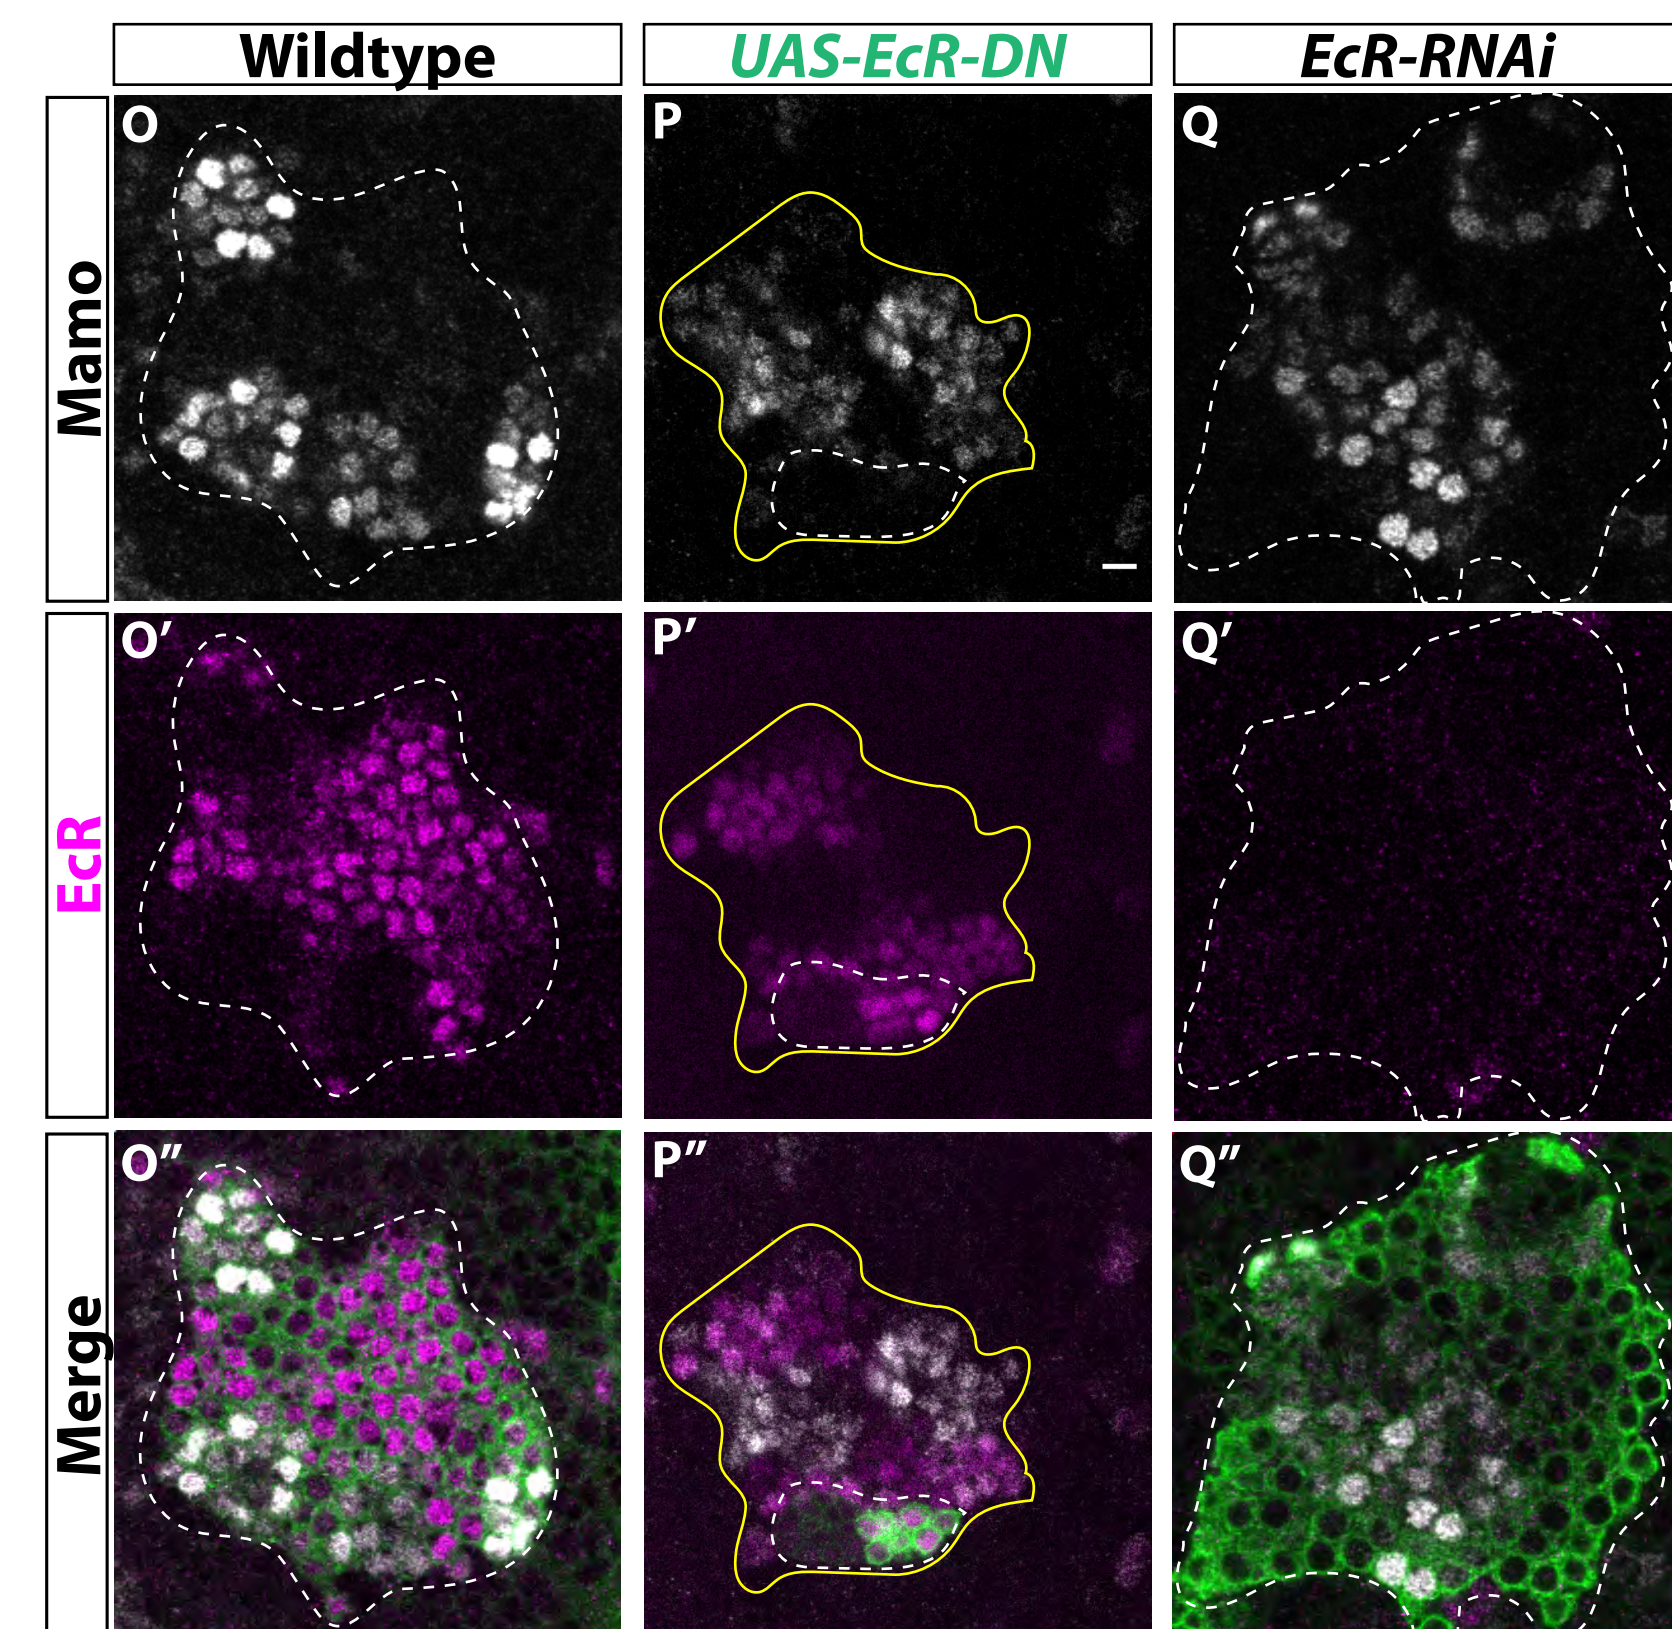

Adult axonal morphology:  $\gamma$ ,  $\alpha'\beta'$ ,  $\alpha\beta$

# Wildtype

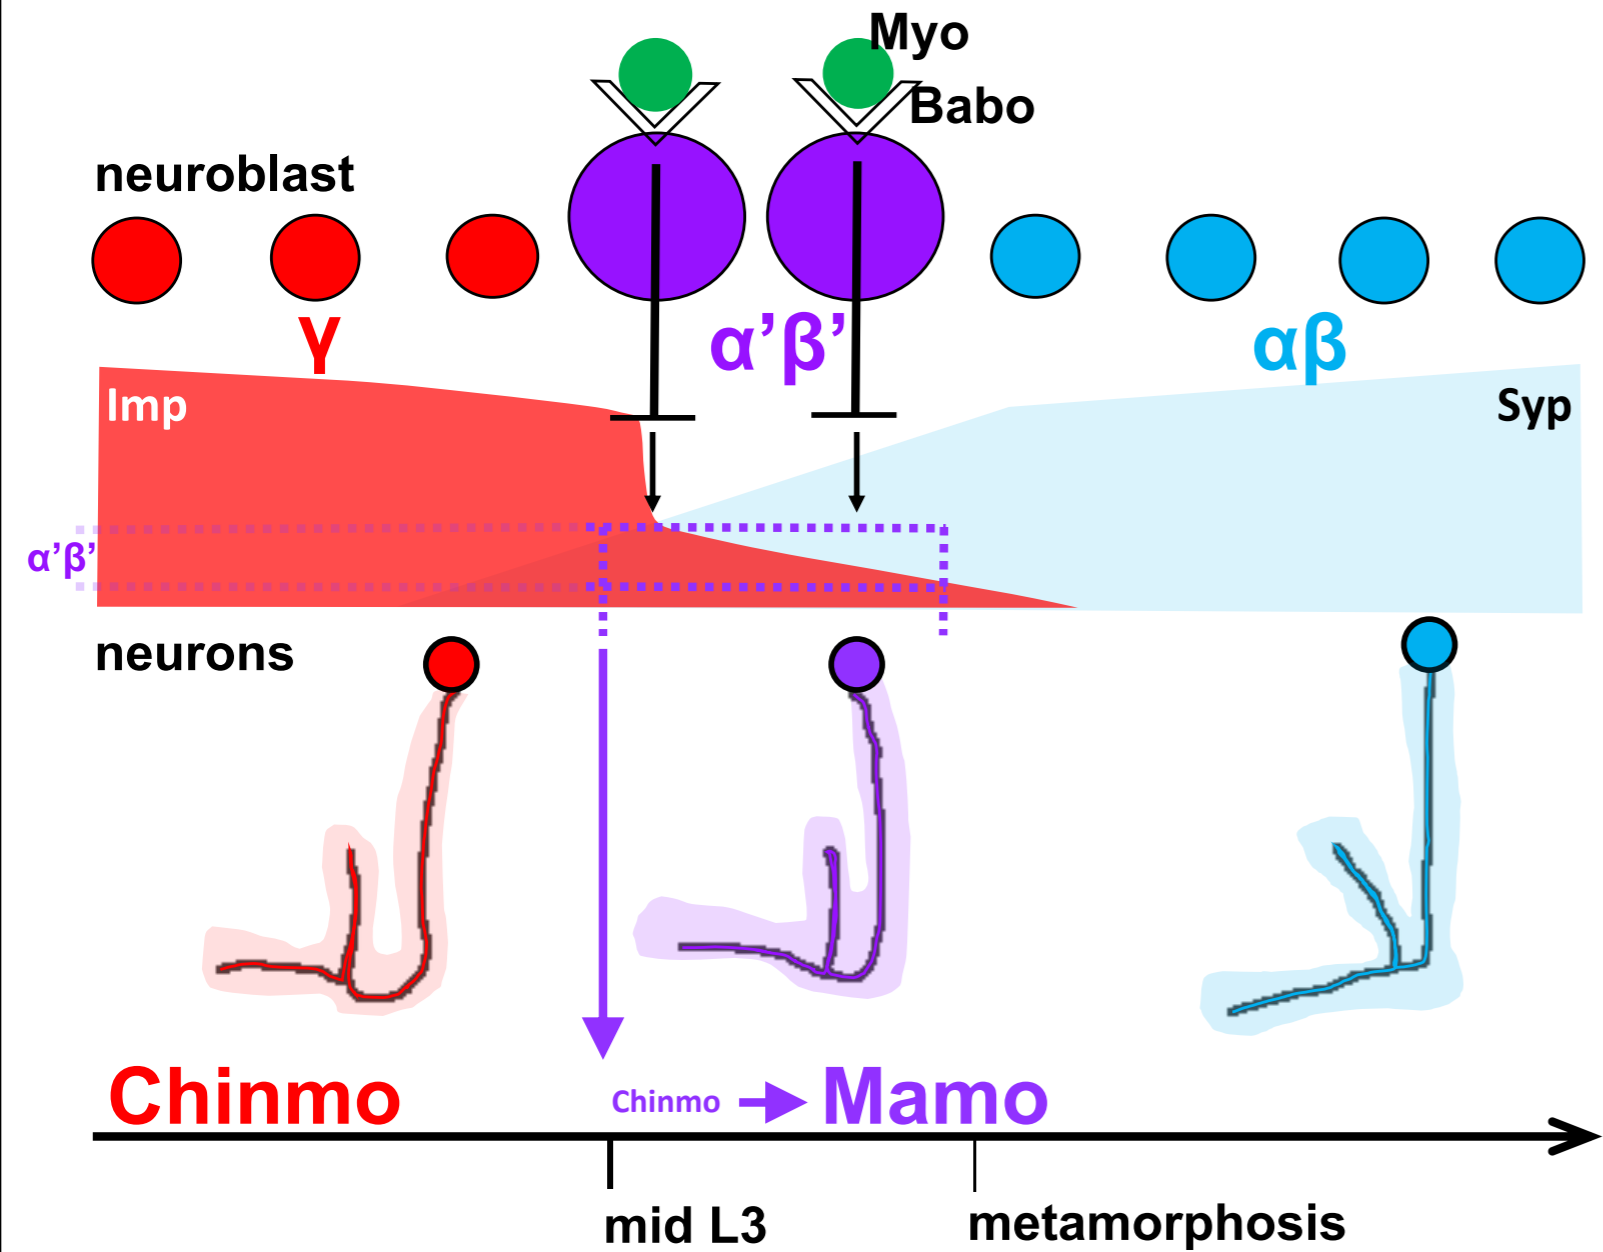

# *babo*

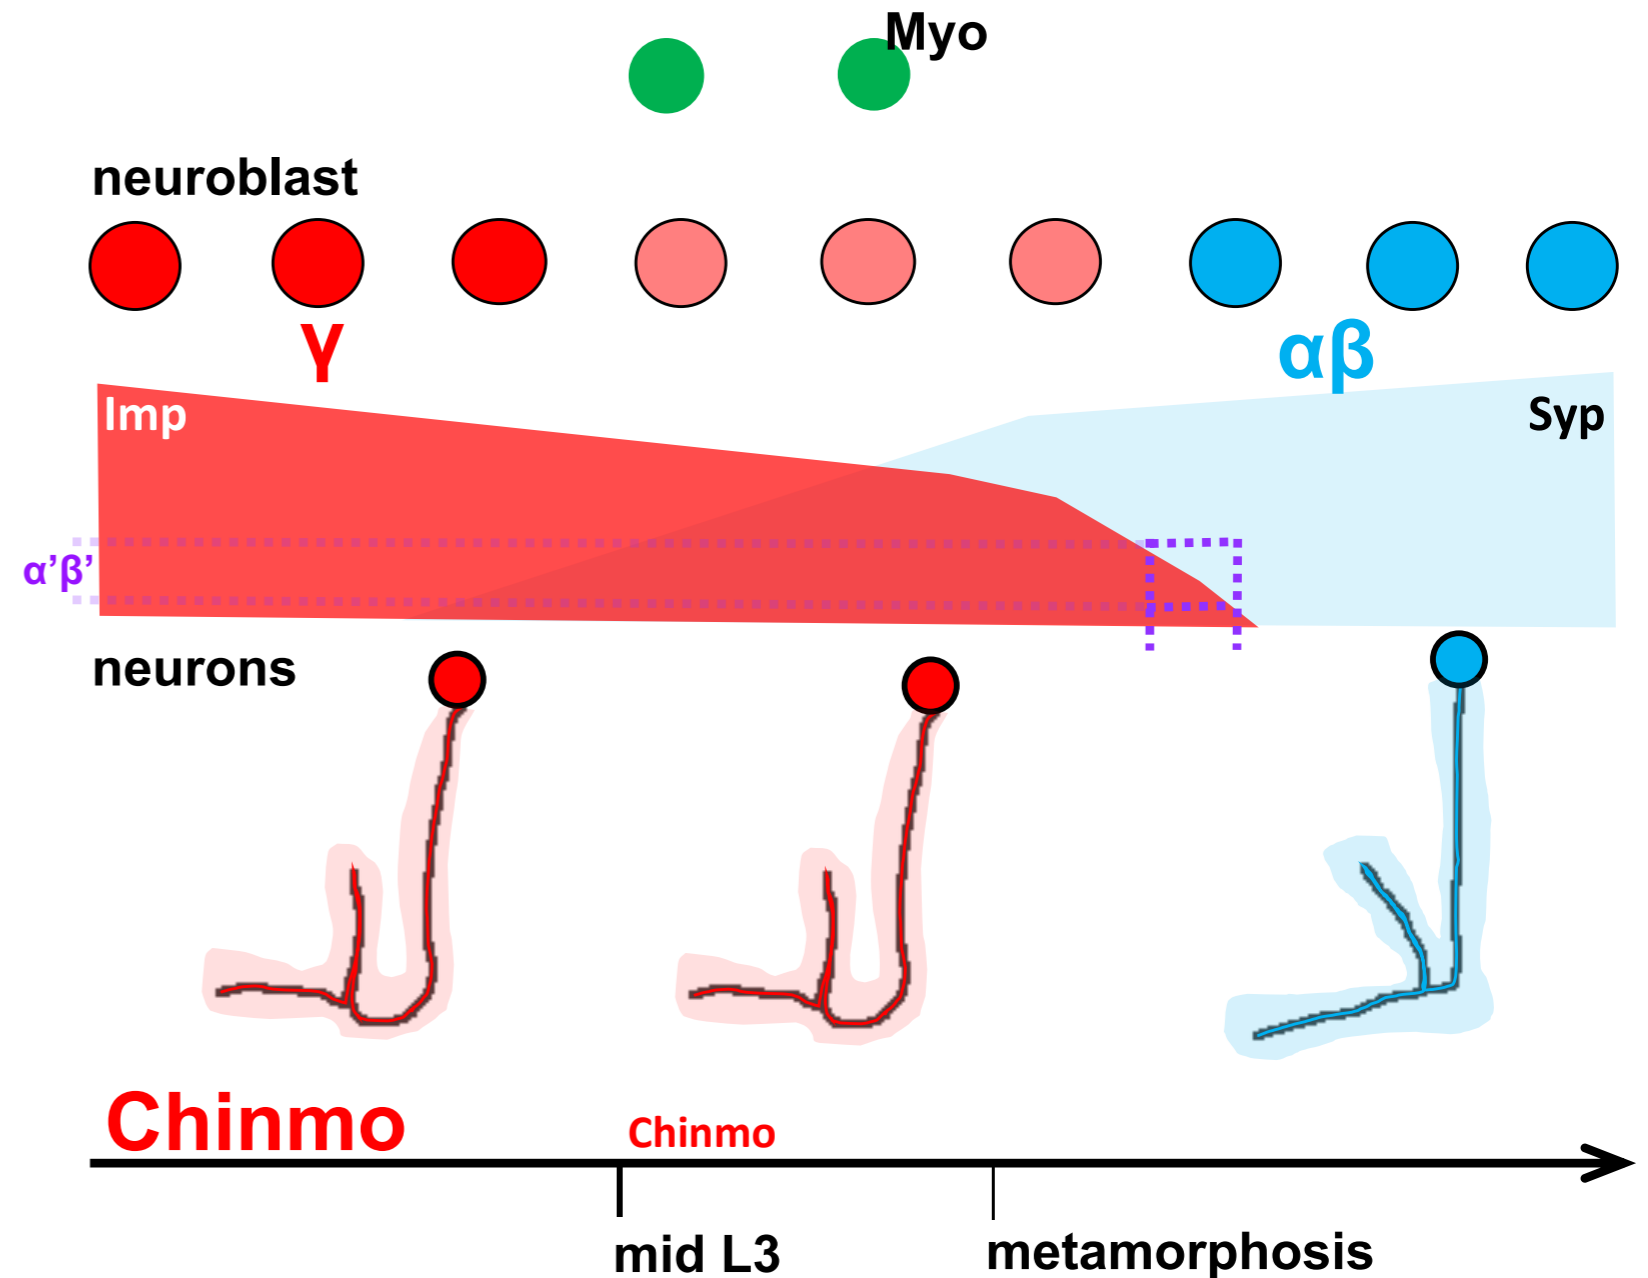

Source: https://www.biorxiv.org/content/10.1101/870493v2.full.pdf
